# Supplementary material for: Deletion 6q Drives T-cell Leukemia Progression by Ribosome Modulation
Source: Oxford University Press journal article supplement (doi:10.1158/2159-8290.cd-17-0831), 2018-09-28
Supplement: 21598290cd170831-sup-186739_3_supp_5007899_p4jdqj.xlsx [file 21598290cd170831-sup-186739_3_supp_5007899_p4jdqj.xlsx]

## Sheet: Table S4
Table S4. Transcripts from 475 genes were differentially translated between deleted and non deleted cells.
The list is ordered according to the ratio del/Non del cells (decreased towards increased translation efficiency)
Gene symbol	apvEff	apvRvmPAdj	singleRegMode
MT1X	-1.53399	0.119022	translation
UQCRB	-1.30772	0.112494	translation
PPIP5K2	-1.28717	0.0942767	translation
TXN	-1.24387	0.101992	translation
DNAJC1	-1.22686	0.0942767	translation
HRSP12	-1.22596	0.0942767	translation
RPL22L1	-1.21623	0.113438	translation
COX7C	-1.20588	0.115391	translation
B4GALT6	-1.17191	0.113438	translation
MRPS18C	-1.16374	0.116423	translation
PPP1R1C	-1.15542	0.115391	translation
PLAC8	-1.12388	0.0942767	translation
SNRPE	-1.07486	0.142615	translation
AK6	-1.07169	0.115664	translation
REEP5	-1.05938	0.142388	translation
KIRREL2	-1.05436	0.116423	translation
PAGE5	-1.05166	0.113438	translation
CTSC	-1.04399	0.119759	translation
COX6C	-1.03989	0.0945295	translation
POMP	-1.03188	0.0942767	translation
TMEM14C	-1.00809	0.119022	translation
COA6	-1.00596	0.116423	translation
TMEM242	-1.00105	0.113438	translation
PPIL3	-0.999436	0.113438	translation
ATG4C	-0.99784	0.116423	translation
DCBLD2	-0.99523	0.146377	translation
COX16	-0.995191	0.134057	translation
AKAP7	-0.986234	0.095601	translation
MRPL13	-0.974558	0.095601	translation
NUDCD2	-0.973428	0.116423	translation
GALNT1	-0.97212	0.137286	translation
ST3GAL5	-0.968197	0.113438	translation
TMEM126B	-0.960041	0.113438	translation
HIGD1A	-0.959117	0.111793	translation
VPS29	-0.956359	0.116423	translation
USMG5	-0.953972	0.113438	translation
TEX30	-0.953877	0.113438	translation
BBIP1	-0.952669	0.113438	translation
EPC2	-0.944665	0.113438	translation
NDUFAF2	-0.941232	0.119022	translation
SF3B6	-0.937408	0.113438	translation
NEXN	-0.93624	0.116423	translation
SMIM20	-0.932667	0.146131	translation
DNAJC19	-0.931052	0.119022	translation
SLIRP	-0.928412	0.113438	translation
CISD2	-0.926	0.113438	translation
WBP5	-0.918281	0.142388	translation
CAMLG	-0.917665	0.113438	translation
UCHL3	-0.917439	0.137988	translation
FDX1	-0.902209	0.146299	translation
NDUFS4	-0.90088	0.111046	translation
C10orf107	-0.898864	0.119022	translation
NDUFA5	-0.897498	0.113438	translation
MRPS17	-0.895865	0.113438	translation
ITGB3BP	-0.8886	0.115391	translation
EBPL	-0.886866	0.142615	translation
SNX25	-0.883052	0.123767	translation
SBF2-AS1	-0.882336	0.137286	translation
GLRX	-0.880245	0.116423	translation
ARL6IP5	-0.876763	0.119022	translation
KIAA0101	-0.87215	0.14553	translation
COX11	-0.870072	0.113438	translation
NIPSNAP3A	-0.866894	0.146299	translation
MAGOHB	-0.863915	0.113438	translation
DACH1	-0.858505	0.115391	translation
USP51	-0.855787	0.142615	translation
GKAP1	-0.852625	0.113438	translation
SVIP	-0.850536	0.113438	translation
THAP1	-0.848883	0.113438	translation
C5orf28	-0.848733	0.136529	translation
SNRPD1	-0.845607	0.134316	translation
LYRM5	-0.844952	0.116423	translation
LOC100505920	-0.84314	0.142615	translation
LINC00998	-0.841256	0.116423	translation
LSM5	-0.836705	0.116423	translation
ERGIC2	-0.836217	0.137286	translation
ERP44	-0.835511	0.116423	translation
ABRACL	-0.828999	0.116423	translation
CRIPT	-0.824287	0.148575	translation
DTWD1	-0.823916	0.116423	translation
OTUD6B-AS1	-0.819877	0.146299	translation
LYPLAL1	-0.818352	0.119022	translation
C1D	-0.816023	0.115391	translation
DPH3	-0.809425	0.116423	translation
NDUFA4	-0.804763	0.119759	translation
SCD5	-0.804689	0.119759	translation
EMC7	-0.803657	0.138386	translation
CNIH1	-0.799942	0.123767	translation
RPA3	-0.799002	0.121776	translation
CENPA	-0.798109	0.129382	translation
MSANTD3	-0.794111	0.130189	translation
CCNG1	-0.79312	0.142388	translation
NDUFB5	-0.792981	0.119234	translation
TRAT1	-0.792042	0.119022	translation
MED30	-0.79143	0.119022	translation
TXNDC17	-0.789381	0.119022	translation
COX7B	-0.789129	0.121776	translation
CRIP1	-0.787652	0.148333	translation
TXNDC9	-0.786872	0.142388	translation
SUV39H2	-0.784635	0.137286	translation
MED21	-0.783378	0.116423	translation
ANAPC10	-0.782555	0.119022	translation
COMMD8	-0.780057	0.119022	translation
CYCS	-0.7791	0.119022	translation
SDHAF3	-0.774859	0.142388	translation
IFT22	-0.773207	0.13322	translation
CCDC109B	-0.770926	0.116423	translation
MRPL47	-0.767582	0.136529	translation
BET1	-0.767077	0.137286	translation
RPS27L	-0.765927	0.137988	translation
MRPL50	-0.765516	0.127635	translation
ATP5J	-0.764382	0.119022	translation
ZNF302	-0.762153	0.119759	translation
CHAC2	-0.761938	0.120826	translation
FKBP3	-0.759669	0.116423	translation
EFCAB11	-0.758388	0.127783	translation
APIP	-0.754966	0.119759	translation
EMC2	-0.752093	0.137988	translation
BLVRA	-0.744565	0.119022	translation
CENPW	-0.743001	0.11997	translation
PAIP2B	-0.741698	0.14553	translation
PTS	-0.739421	0.14553	translation
EFCAB2	-0.734705	0.146131	translation
SETD9	-0.734438	0.136355	translation
ZNF138	-0.732819	0.136529	translation
FAIM	-0.732566	0.120826	translation
SEC11C	-0.731673	0.119022	translation
GLRX2	-0.727448	0.121776	translation
GMFB	-0.726394	0.119759	translation
SMYD2	-0.723364	0.120826	translation
ZBTB8OS	-0.71534	0.136504	translation
FAM92A1	-0.711279	0.123767	translation
NDUFB2	-0.710089	0.146299	translation
C12orf29	-0.709657	0.137988	translation
DPY30	-0.705629	0.13322	translation
MRPS28	-0.704163	0.127635	translation
C16orf87	-0.702383	0.142615	translation
SLMO2	-0.700568	0.139806	translation
SCLT1	-0.698203	0.124494	translation
CCNC	-0.697085	0.146299	translation
EFCAB10	-0.693105	0.142388	translation
SCOC	-0.6922	0.142615	translation
NIFK	-0.690817	0.142615	translation
DTD2	-0.686538	0.148168	translation
COMMD1	-0.684024	0.142615	translation
ZNF181	-0.682227	0.137988	translation
MPC1	-0.681011	0.135415	translation
C12orf73	-0.681	0.137286	translation
RAB9A	-0.679692	0.139418	translation
FASTKD3	-0.679181	0.142693	translation
TAF9	-0.678307	0.142615	translation
POT1	-0.677217	0.14102	translation
ARMC10	-0.675614	0.14113	translation
RPGRIP1L	-0.668969	0.142388	translation
MRPS36	-0.666391	0.136529	translation
LSM3	-0.664993	0.135172	translation
ACOT13	-0.664567	0.144326	translation
SMIM14	-0.664377	0.137988	translation
SAT2	-0.662465	0.142388	translation
ZNF737	-0.65877	0.146299	translation
ARL6IP1	-0.653135	0.148168	translation
PHTF2	-0.652958	0.142388	translation
ASUN	-0.650479	0.144951	translation
ASAH1	-0.646512	0.140315	translation
ZCCHC10	-0.645666	0.140315	translation
ZNF596	-0.644833	0.146091	translation
MRPL30	-0.644011	0.137286	translation
PSMC1	-0.638967	0.142388	translation
UBE2V2	-0.638844	0.142388	translation
ATG10	-0.63322	0.145033	translation
PFDN4	-0.631883	0.149094	translation
RBM7	-0.63005	0.142615	translation
NUCB2	-0.627421	0.146299	translation
DNAJC24	-0.6257	0.146299	translation
FAM175A	-0.625414	0.146299	translation
MRPS14	-0.623678	0.14553	translation
TATDN1	-0.621416	0.149547	translation
PDE6D	-0.618497	0.144951	translation
IRAK1BP1	-0.617038	0.142615	translation
IQCK	-0.614826	0.146299	translation
C1orf21	-0.609476	0.148912	translation
TMEM237	-0.607259	0.146299	translation
EAF2	-0.606568	0.146299	translation
C11orf73	-0.605889	0.146299	translation
TCTEX1D2	-0.591742	0.146299	translation
QARS	0.603974	0.148912	translation
COPG1	0.617295	0.146299	translation
DIDO1	0.625918	0.148168	translation
IQGAP3	0.630915	0.142615	translation
ZMYM3	0.635208	0.144951	translation
ANAPC2	0.635754	0.142388	translation
ZNF76	0.640037	0.142615	translation
CEP131	0.64085	0.146299	translation
GINS4	0.642155	0.146131	translation
TRAP1	0.645961	0.142388	translation
YEATS2	0.649219	0.142615	translation
POLG	0.654026	0.142615	translation
ATXN7L3	0.654302	0.142615	translation
PTPN1	0.65672	0.148575	translation
NLGN2	0.657248	0.146299	translation
WDR1	0.658065	0.146299	translation
ATP8B3	0.65829	0.142615	translation
LSS	0.66974	0.145003	translation
THRAP3	0.671067	0.135172	translation
DHRS2	0.675993	0.135172	translation
HECTD3	0.677324	0.142615	translation
PCGF2	0.680088	0.14553	translation
SMARCA2	0.680199	0.134057	translation
HDAC1	0.68331	0.146299	translation
SLC35A4	0.683894	0.142615	translation
PRC1	0.685149	0.142615	translation
IFT122	0.687512	0.134316	translation
MCM3	0.692597	0.131462	translation
TNKS1BP1	0.693267	0.142388	translation
DHX34	0.694374	0.122893	translation
DCAF8	0.696652	0.146299	translation
ZNF496	0.696745	0.142615	translation
EZR	0.696907	0.144951	translation
STAT6	0.698119	0.142388	translation
MTMR3	0.699173	0.126901	translation
SRPR	0.699379	0.134316	translation
NRBP1	0.699804	0.140315	translation
HIRA	0.703132	0.142025	translation
GTF2F1	0.705219	0.146091	translation
PPIL2	0.708706	0.120826	translation
MAST1	0.711895	0.148168	translation
MECP2	0.712616	0.142615	translation
ZC3H13	0.713736	0.148209	translation
TRIM14	0.71556	0.120826	translation
HIVEP1	0.715997	0.123767	translation
HP1BP3	0.721389	0.119759	translation
ACTN1	0.72408	0.146299	translation
IPO4	0.725599	0.119022	translation
NUP214	0.72667	0.131034	translation
URB1	0.727619	0.119022	translation
METAP1	0.728199	0.135172	translation
CLASP1	0.731614	0.137286	translation
ALDOC	0.734619	0.142615	translation
PHF12	0.742994	0.146091	translation
IGF2R	0.743004	0.136529	translation
JRK	0.746546	0.135415	translation
GON4L	0.746609	0.119759	translation
USP36	0.750307	0.119759	translation
PDCD11	0.750538	0.120826	translation
GRIPAP1	0.751324	0.120826	translation
SART1	0.752638	0.146091	translation
DIAPH1	0.755436	0.119759	translation
DCAF7	0.762839	0.135172	translation
ATXN2	0.764577	0.135172	translation
SLC6A6	0.764743	0.116423	translation
DGCR8	0.768897	0.14553	translation
PTPRF	0.771461	0.146299	translation
PSME3	0.772332	0.116423	translation
RPL8	0.77352	0.116423	translation
CCDC88C	0.776252	0.146299	translation
HCLS1	0.778254	0.128785	translation
KMT2A	0.782122	0.120826	translation
SEC24C	0.783325	0.136529	translation
ZSWIM4	0.78797	0.137988	translation
ARFGAP1	0.788085	0.142615	translation
SCAF4	0.788253	0.146299	translation
CLSTN1	0.790035	0.134316	translation
ZC3H4	0.79014	0.14102	translation
RCC2	0.790671	0.146299	translation
PSTPIP2	0.790776	0.119759	translation
RERE	0.79422	0.137902	translation
GTF3C1	0.796339	0.142615	translation
TPX2	0.800799	0.132724	translation
TFIP11	0.805003	0.1206	translation
CALR	0.808321	0.140315	translation
NUP188	0.809385	0.135172	translation
R3HDM2	0.812264	0.121673	translation
ZAP70	0.813054	0.142615	translation
KDM2A	0.814952	0.128696	translation
LONP1	0.815991	0.116423	translation
CSNK2A1	0.816988	0.116423	translation
SETD5	0.818039	0.116423	translation
PIP4K2B	0.819587	0.146299	translation
PABPC4	0.819714	0.1206	translation
USP5	0.820841	0.142388	translation
KAT2A	0.821761	0.117653	translation
DLG4	0.822001	0.121776	translation
SLX4	0.82397	0.137988	translation
LASP1	0.82437	0.136529	translation
EWSR1	0.825275	0.14102	translation
HECTD4	0.826717	0.1206	translation
ACTN4	0.827819	0.116423	translation
NMT1	0.829943	0.119759	translation
SND1	0.8306	0.116423	translation
TCOF1	0.831499	0.113438	translation
CS	0.836194	0.113438	translation
AMPD2	0.836934	0.134316	translation
NFRKB	0.837732	0.113438	translation
MICAL3	0.839483	0.135172	translation
SREBF2	0.839761	0.146299	translation
SCAMP4	0.840106	0.113438	translation
VPS53	0.843703	0.124494	translation
TCF20	0.845954	0.119022	translation
PPP1R15A	0.847124	0.148096	translation
KIF18B	0.847416	0.126962	translation
UBQLN4	0.847794	0.119759	translation
SMC1A	0.848187	0.136355	translation
GNL3L	0.848783	0.116423	translation
MARK4	0.849833	0.116423	translation
SETD2	0.852631	0.116423	translation
PLCG1	0.854327	0.116423	translation
XRCC6	0.856297	0.142388	translation
RNF213	0.857881	0.137988	translation
WDR6	0.857945	0.116423	translation
YY1AP1	0.85887	0.113438	translation
LARP1	0.860121	0.113438	translation
DDX11	0.869191	0.116423	translation
PRRC2C	0.869275	0.113438	translation
CPSF7	0.872457	0.113438	translation
NELFA	0.876534	0.123767	translation
GOLGA3	0.876682	0.116423	translation
TICRR	0.878183	0.127635	translation
CAP1	0.879854	0.137286	translation
SLC25A23	0.892092	0.132724	translation
NOP14	0.893017	0.116423	translation
UBE2O	0.896142	0.113438	translation
VAT1	0.898092	0.11997	translation
SF3B3	0.898404	0.119022	translation
TSPYL2	0.898991	0.142388	translation
SP2	0.89961	0.115391	translation
CEP250	0.905464	0.121673	translation
RNF216	0.906121	0.116423	translation
RRBP1	0.907809	0.113438	translation
PSMD2	0.908722	0.111793	translation
SLC25A39	0.910941	0.119022	translation
NKX2-5	0.913052	0.142615	translation
RNF40	0.913648	0.116423	translation
MCM2	0.918925	0.142388	translation
RANGAP1	0.920385	0.113438	translation
TAF15	0.920744	0.119022	translation
TCF7	0.921094	0.116423	translation
MAP2K2	0.924434	0.134057	translation
ZNF384	0.925691	0.116423	translation
MED15	0.92575	0.137286	translation
ATP1A3	0.925789	0.113438	translation
PSD4	0.928004	0.142615	translation
PARP1	0.928969	0.113438	translation
RPS15	0.936198	0.142615	translation
WARS	0.94151	0.113438	translation
LCP1	0.94161	0.119759	translation
CIT	0.944042	0.113438	translation
RAC2	0.944053	0.146299	translation
DNM2	0.944224	0.126962	translation
GIGYF2	0.945813	0.107022	translation
NXF1	0.947438	0.116423	translation
ARAP1	0.948986	0.146299	translation
HMGA1	0.949903	0.137988	translation
AP2M1	0.950272	0.14553	translation
PHACTR4	0.956449	0.119022	translation
ZNF609	0.95762	0.116423	translation
SLIT1	0.960926	0.136529	translation
UBTF	0.962338	0.116423	translation
ASXL1	0.965014	0.111046	translation
NISCH	0.966996	0.119022	translation
MKI67	0.96746	0.142388	translation
WNK1	0.969341	0.134057	translation
SPEN	0.971772	0.134316	translation
UBR4	0.972987	0.127635	translation
ULK3	0.975158	0.137286	translation
PRMT5	0.977377	0.115664	translation
AARS	0.985752	0.113438	translation
PLEKHG2	0.987241	0.127635	translation
PTPN7	0.98875	0.113438	translation
SYMPK	0.990613	0.137988	translation
TGFB1	0.992548	0.146299	translation
CKAP5	0.993486	0.119022	translation
FAT1	0.994002	0.119022	translation
ALDOA	0.995601	0.113438	translation
MORC2	0.995864	0.11092	translation
RREB1	0.996546	0.113438	translation
INTS3	1.00284	0.116423	translation
ODF2	1.00313	0.134316	translation
PCNT	1.0087	0.119759	translation
KDM5B	1.01769	0.119022	translation
GPATCH8	1.02125	0.116423	translation
CHERP	1.02284	0.120826	translation
SF3B2	1.02648	0.136529	translation
MLLT6	1.02666	0.142615	translation
CDC25B	1.02879	0.119022	translation
PRKCSH	1.03112	0.0942767	translation
SMG7	1.03689	0.146299	translation
CHD8	1.03763	0.116423	translation
IL2RG	1.03781	0.095601	translation
ABHD14B	1.04471	0.119022	translation
STRN4	1.0459	0.142615	translation
PI4KA	1.05106	0.111046	translation
PPRC1	1.06205	0.095601	translation
LEF1	1.07079	0.113438	translation
BCORL1	1.07376	0.113438	translation
HK1	1.07442	0.0942767	translation
CLUH	1.08184	0.101992	translation
NCAPD2	1.08495	0.111046	translation
EP300	1.08785	0.113438	translation
USP11	1.09754	0.126901	translation
GBF1	1.09764	0.116423	translation
UBA1	1.1038	0.116423	translation
STAT3	1.10417	0.113438	translation
DDX23	1.10644	0.0942767	translation
TMC6	1.10834	0.119022	translation
ACIN1	1.1084	0.111046	translation
MYO18B	1.11032	0.095601	translation
TBCD	1.12823	0.116423	translation
FARSA	1.1351	0.119022	translation
CCAR2	1.13649	0.116423	translation
PPDPF	1.13771	0.121776	translation
SAFB	1.13955	0.0874474	translation
MOB3A	1.14716	0.14553	translation
U2AF2	1.14952	0.106376	translation
MYO1G	1.15901	0.119022	translation
GATAD2B	1.16104	0.0874474	translation
EXOC3	1.16463	0.113438	translation
DBN1	1.16617	0.121776	translation
FXYD5	1.16738	0.0874474	translation
SMG5	1.18298	0.113438	translation
GCN1	1.18683	0.14553	translation
ILF3	1.20016	0.0874474	translation
CUL9	1.20137	0.116423	translation
FAM193A	1.20537	0.0874474	translation
UBAP2L	1.2054	0.146299	translation
MYBBP1A	1.20714	0.0874474	translation
TXLNA	1.20924	0.0942767	translation
PRRC2B	1.21005	0.147863	translation
TNRC18	1.218	0.142388	translation
FASN	1.21809	0.116423	translation
CAD	1.21867	0.142615	translation
GPI	1.22976	0.0874474	translation
MSN	1.23104	0.095601	translation
GRAMD1A	1.23377	0.111793	translation
GYS1	1.23881	0.146299	translation
ATP2A3	1.25327	0.142388	translation
NCOA5	1.2538	0.119022	translation
EFTUD2	1.25636	0.113438	translation
DHX37	1.26237	0.095601	translation
PTBP1	1.27221	0.113438	translation
ANKRD52	1.27297	0.0874474	translation
DNMT1	1.29841	0.0942767	translation
XPO6	1.30267	0.0874474	translation
EIF3B	1.30504	0.113438	translation
SMARCA4	1.31165	0.095601	translation
MCM7	1.31216	0.0874474	translation
PTMS	1.31507	0.119022	translation
RPTOR	1.32505	0.11997	translation
ALDH1A2	1.32915	0.0874474	translation
LENG8	1.32978	0.116423	translation
SPTBN1	1.33196	0.113438	translation
TAF3	1.34329	0.146299	translation
ZNF512B	1.37179	0.113438	translation
HUWE1	1.37502	0.113438	translation
TAF6	1.37621	0.116423	translation
SNRNP200	1.38035	0.119759	translation
MYO18A	1.3898	0.126901	translation
PKM	1.43894	0.0874474	translation
NONO	1.43902	0.0874474	translation
SRRT	1.45587	0.0874474	translation
CC2D1A	1.48472	0.128785	translation
DYNLRB1	1.50004	0.0874474	translation
SMARCC2	1.50712	0.1206	translation
MAPK8IP3	1.53328	0.111046	translation
WBP2	1.57599	0.0874474	translation
ARID1A	1.58227	0.116423	translation
DCTN1	1.6044	0.137286	translation
CNN2	1.62322	0.116423	translation
CABIN1	1.63319	0.146131	translation
SRRM2	1.64615	0.113438	translation
EIF4G1	1.67017	0.111046	translation
SUPT6H	1.70504	0.095601	translation
SUPT5H	1.73152	0.0945295	translation
LGALS9	1.92538	0.142314	translation
RNA45S5	1.95935	0.0874474	translation
TUBB4A	2.12052	0.0874474	translation
