# Supplementary material for: Deletion 6q Drives T-cell Leukemia Progression by Ribosome Modulation
Source: Oxford University Press journal article supplement (doi:10.1158/2159-8290.cd-17-0831), 2018-09-28
Supplement: 21598290cd170831-sup-186739_3_supp_5007900_ppjdqj.xlsx [file 21598290cd170831-sup-186739_3_supp_5007900_ppjdqj.xlsx]

## Sheet: REGULATED GENES
Human T-ALL from xenograft, ShRNA SNCRIP-SNHG5 (n=4) versus ShRNA LUC (Ctrl, n=4)
2 sheets
	Up-regulated	Down-regulated	All
Number of regulated genes	524	1311	1835
Min fold-change	1.2	1.2	1.2
Average fold-change	1.38235	1.47397	1.4478
Median of fold-change	1.33	1.43	1.4
Max fold-change	2.94	2.63	2.94
Gene with the max fold-change	AK126906	NTM	AK126906
1. List of 1,835 Regulated Genes (Fold-change ≥ 1,2; P-Value ≤ 0,05)
Green, down-regulated genes; Pink, up-regulated genes (ranked by fold change value)
FAST DB STABLE ID	Gene Symbol	Regulation	Fold-Change	P-Value	Gene Coordinates (hg19)	UCSC Link	Gene Name	Aliases and Synonyms	Representative Transcript ID	Entrez Gene ID	EnsEMBL ID	Intensity shLUC	Intensity shDOUBLE	Low-specificity probe included?
GSHG0005412	NTM	down	2.63	0.0117	chr11(+):131240376-132205529	UCSC	neurotrimin	HNT // IGLON2 // NTRI	AY358331	50863	ENSG00000182667	8.88	7.49	No
GSHG0008375	---	down	2.42	0.0113	chr13(-):28003948-28006057	UCSC	---	---	AK124468	---	---	6.64	5.37	No
GSHG0030892	RFK	down	2.42	0.00876	chr9(-):79000446-79009433	UCSC	riboflavin kinase	FLJ11149 // RIFK	BC007069	55312	ENSG00000135002	7.97	6.69	No
GSHG0019602	ATP5J	down	2.33	0.0136	chr21(-):27096812-27107984	UCSC	ATP synthase, H+ transporting, mitochondrial Fo complex, subunit F6	ATP5 // ATP5A // ATPM // CF6	BC001178	522	ENSG00000154723	9.88	8.66	No
GSHG0003589	---	down	2.3	0.000221	chr10(+):98280742-98281483	UCSC	---	---	AF124819	---	---	6.14	4.94	No
GSHG0015149	ZNF528	down	2.28	0.00228	chr19(+):52901102-52921656	UCSC	zinc finger protein 528	KIAA1827	AK056552	84436	ENSG00000167555	7.87	6.68	No
GSHG0012249	---	down	2.27	0.0418	chr17(+):15622532-15624098	UCSC	---	---	AK055651	---	---	6.75	5.56	No
GSHG0001611	C1orf150	down	2.2	0.0428	chr1(+):247670379-247740990	UCSC	chromosome 1 open reading frame 150	FLJ44728	AK126682	148823	ENSG00000169224	7.88	6.74	No
GSHG0015150	ZNF534	down	2.19	0.000958	chr19(+):52932440-52955568	UCSC	zinc finger protein 534	KRBO3 // FLJ25344	AK058073	147658	ENSG00000198633	8.81	7.67	Yes
GSHG0000799	---	down	2.18	0.00274	chr1(+):111486089-111495470	UCSC	---	---	AK124172	---	---	7.64	6.51	No
GSHG0009036	GPR65	down	2.12	0.0125	chr14(+):88471493-88478418	UCSC	G protein-coupled receptor 65	hTDAG8 // TDAG8	BC035633	8477	ENSG00000140030	7.01	5.93	Yes
GSHG0007242	CD69	down	2.12	0.0485	chr12(-):9905086-9916175	UCSC	CD69 molecule	CLEC2C	DQ893175	969	ENSG00000110848	10.51	9.42	No
GSHG0029007	---	down	2.11	0.0285	chr8(+):53038150-53038778	UCSC	---	---	AF074982	---	---	7.98	6.9	No
GSHG0003392	CDK1	down	2.11	0.0112	chr10(+):62538123-62553924	UCSC	cyclin-dependent kinase 1	CDC2 // CDC28A	Y00272	983	ENSG00000170312	8.57	7.5	No
GSHG0013035	---	down	2.09	0.0151	chr17(-):6676150-6679438	UCSC	---	---	AK128092	---	---	7.19	6.13	No
GSHG0029074	---	down	2.09	0.023	chr8(+):70854829-70856283	UCSC	---	---	BC045716	---	---	11.12	10.05	Yes
GSHG0010494	RPS27L	down	2.08	0.0136	chr15(-):63446052-63449676	UCSC	ribosomal protein S27-like	---	BC047648	51065	ENSG00000185088	8.71	7.66	No
GSHG0003468	VDAC2	down	2.07	0.0113	chr10(+):76970563-76991204	UCSC	voltage-dependent anion channel 2	---	BC000165	7417	ENSG00000165637	10.62	9.57	No
GSHG0024950	ARRDC3	down	2.06	0.0256	chr5(-):90664543-90679124	UCSC	arrestin domain containing 3	KIAA1376	BC053619	57561	ENSG00000113369	8.54	7.5	No
GSHG0008018	POMP	down	2.05	0.011	chr13(+):29230753-29253059	UCSC	proteasome maturation protein	C13orf12 // HSPC014 // UMP1	DQ894129	51371	ENSG00000132963	11.25	10.22	No
GSHG0010095	FAM103A1	down	2.04	0.0123	chr15(+):83654986-83659801	UCSC	family with sequence similarity 103, member A1	C15orf18 // HsT19360 // MGC2560	AK027095	83640	ENSG00000169612	7.58	6.55	No
GSHG0032211	---	down	2.02	0.00832	chrX(-):89295032-89296198	UCSC	---	---	AL078636	---	---	7.95	6.93	No
GSHG0026765	---	down	2.02	0.0243	chr6(-):87962961-87967500	UCSC	---	---	BC043168	---	---	7.84	6.82	No
GSHG0030354	FAM206A	down	2.01	0.0189	chr9(+):111696461-111703235	UCSC	family with sequence similarity 206, member A	C9orf6 // CG-8 // FLJ20457	BC015795	54942	ENSG00000119328	7.9	6.9	No
GSHG0030073	ANXA2P2	down	2	0.039	chr9(+):33624223-33625516	UCSC	annexin A2 pseudogene 2	ANX2L2 // ANX2P2 // LPC2B	M62898	304	ENSG00000231991	9.11	8.1	No
GSHG0010470	GTF2A2	down	1.99	0.0299	chr15(-):59931063-59949737	UCSC	general transcription factor IIA, 2, 12kDa	HsT18745 // TFIIA	BC001919	2958	ENSG00000140307	9.59	8.59	No
GSHG0005417	---	down	1.99	0.0237	chr11(+):131607718-131612114	UCSC	---	---	AK127348	---	---	7.6	6.61	No
GSHG0005525	---	down	1.98	0.000384	chr11(-):5717301-5718058	UCSC	---	---	AL360187	---	---	7.17	6.18	No
GSHG0003150	AKR1C3	down	1.98	0.00148	chr10(+):5119973-5149876	UCSC	aldo-keto reductase family 1, member C3 (3-alpha hydroxysteroid dehydrogenase, type II)	HSD17B5 // DDX // HAKRB // KIAA0119 // PGFS	AK296829	8644	ENSG00000196139	8.11	7.12	No
GSHG0015689	ZNF675	down	1.98	0.0319	chr19(-):23708434-23870004	UCSC	zinc finger protein 675	TBZF // TIZ	BC032394	171392	ENSG00000197372	8.21	7.23	No
GSHG0007501	---	down	1.97	0.0431	chr12(-):53434583-53435835	UCSC	---	---	AF119854	---	---	7.66	6.68	No
GSHG0015691	ZNF681	down	1.97	0.00104	chr19(-):23926160-23941696	UCSC	zinc finger protein 681	FLJ31526	AK056088	148213	ENSG00000196172	8.18	7.2	No
GSHG0015687	ZNF91	down	1.97	0.0022	chr19(-):23542036-23578269	UCSC	zinc finger protein 91	HPF7 // HTF10	AK291256	7644	ENSG00000167232	9.91	8.93	No
GSHG0029571	ST18	down	1.96	0.0068	chr8(-):53023399-53322365	UCSC	suppression of tumorigenicity 18 (breast carcinoma) (zinc finger protein)	ZNF387 // KIAA0535	AB011107	9705	ENSG00000147488	8.29	7.32	No
GSHG0008926	EIF2S1	down	1.95	0.0216	chr14(+):67827045-67852156	UCSC	eukaryotic translation initiation factor 2, subunit 1 alpha, 35kDa	EIF2 // EIF-2alpha // EIF2A	BC002513	1965	ENSG00000134001	9.34	8.37	No
GSHG0024186	SNX2	down	1.95	0.0266	chr5(+):122110750-122165800	UCSC	sorting nexin 2	---	AK023716	6643	ENSG00000205302	8.89	7.93	No
GSHG0015662	ZNF626	down	1.94	0.0248	chr19(-):20807091-20844406	UCSC	zinc finger protein 626	---	BC172571	199777	ENSG00000188171	8.3	7.34	No
GSHG0010298	---	down	1.94	0.0137	chr15(-):35397325-35399726	UCSC	---	---	AL117570	---	---	6.03	5.07	No
GSHG0010055	PSMA4	down	1.94	0.00482	chr15(+):78832769-78841543	UCSC	proteasome (prosome, macropain) subunit, alpha type, 4	HC9 // HsT17706	BC056249	5685	ENSG00000041357	9.52	8.56	No
GSHG0005794	---	down	1.94	0.0323	chr11(-):58386062-58387370	UCSC	---	---	AF305825	---	---	8.57	7.61	No
GSHG0031743	NXT2	down	1.94	0.0259	chrX(+):108779010-108787919	UCSC	nuclear transport factor 2-like export factor 2	P15-2	AK023289	55916	ENSG00000101888	9.28	8.32	No
GSHG0008366	MTMR6	down	1.93	0.00946	chr13(-):25802307-25861704	UCSC	myotubularin related protein 6	---	AX748005	9107	ENSG00000139505	8.42	7.47	No
GSHG0005333	SC5DL	down	1.93	0.00536	chr11(+):121163453-121179347	UCSC	sterol-C5-desaturase (ERG3 delta-5-desaturase homolog, S. cerevisiae)-like	---	AB016247	6309	ENSG00000109929	8.42	7.47	No
GSHG0002775	---	down	1.93	0.0231	chr1(-):179922319-179923575	UCSC	---	---	BC039325	---	---	6.48	5.54	No
GSHG0013278	---	down	1.92	0.00746	chr17(-):34151260-34152957	UCSC	---	---	AK022003	---	---	5.88	4.94	No
GSHG0007640	OSBPL8	down	1.92	0.019	chr12(-):76745580-76953589	UCSC	oxysterol binding protein-like 8	MST120 // MSTP120 // ORP8 // OSBP10	AF392452	114882	ENSG00000091039	9.16	8.22	No
GSHG0003739	---	down	1.92	0.0279	chr10(+):123725279-123727215	UCSC	---	---	BC011188	---	---	6.46	5.52	No
GSHG0011686	THUMPD1	down	1.91	0.0112	chr16(-):20744991-20753406	UCSC	THUMP domain containing 1	FLJ20274	BX640898	55623	ENSG00000066654	7.62	6.69	No
GSHG0011145	ZNF267	down	1.91	0.012	chr16(+):31885119-31928626	UCSC	zinc finger protein 267	HZF2	AK096390	10308	ENSG00000185947	7.46	6.53	No
GSHG0010299	ATPBD4	down	1.91	0.0214	chr15(-):35509571-35838393	UCSC	ATP binding domain 4	MGC14798	AX748407	89978	ENSG00000134146	7.63	6.7	No
GSHG0025501	HIST1H3E	down	1.91	0.0237	chr6(+):26224427-26227699	UCSC	histone cluster 1, H3e	H3FD // H3.1 // H3/d	BC052981	8353	ENSG00000196966	10	9.07	No
GSHG0013303	---	down	1.89	0.043	chr17(-):35685778-35685925	UCSC	---	---	AY315624	---	---	6.49	5.57	No
GSHG0008706	---	down	1.89	0.04	chr14(+):21678715-21678866	UCSC	---	---	Z70766	---	---	7.07	6.15	No
GSHG0002369	---	down	1.89	0.0338	chr1(-):113667294-113669346	UCSC	---	---	BC017961	---	---	6.8	5.88	No
GSHG0010981	---	down	1.88	0.035	chr16(+):15506577-15507128	UCSC	---	---	AF075063	---	---	8.72	7.8	No
GSHG0006089	CHORDC1	down	1.87	0.0329	chr11(-):89934184-89956532	UCSC	cysteine and histidine-rich domain (CHORD) containing 1	CHP1	BC002339	26973	ENSG00000110172	8.65	7.75	No
GSHG0029707	---	down	1.87	0.000535	chr8(-):92006025-92006371	UCSC	---	---	AF086030	---	---	5.76	4.86	Yes
GSHG0020439	NDUFA6	down	1.87	0.0139	chr22(-):42481531-42486888	UCSC	NADH dehydrogenase (ubiquinone) 1 alpha subcomplex, 6, 14kDa	B14 // CI-B14 // LYRM6 // NADHB14	BC002772	4700	ENSG00000184983	10.45	9.54	No
GSHG0010283	---	down	1.86	0.0383	chr15(-):34522198-34524904	UCSC	---	---	AK056019	---	---	9.59	8.69	No
GSHG0020087	PNPLA3 // SAMM50	down	1.86	0.0472	chr22(+):44319619-44392411	UCSC	patatin-like phospholipase domain containing 3 // sorting and assembly machinery component 50 homolog (S. cerevisiae)	ADPN // C22orf20 // adiponutrin // CGI-51 // dJ796I17.1 // FLJ22012 // OMP85 // TOB55 // TRG-3 // YNL026W	BC011681	25813 // 80339	ENSG00000100344 // ENSG00000100347	9.65	8.75	Yes
GSHG0033140	TAGLN2	down	1.86	0.00662	chr1(-):159887903-159895297	UCSC	transgelin 2	HA1756 // KIAA0120	GU727636	8407	ENSG00000158710	10.16	9.26	No
GSHG0012790	RPL38	down	1.85	0.0213	chr17(+):72199801-72205968	UCSC	ribosomal protein L38	L38	AK312119	6169	ENSG00000172809	11.65	10.76	No
GSHG0011230	ARL2BP	down	1.85	0.0264	chr16(+):57279038-57287507	UCSC	ADP-ribosylation factor-like 2 binding protein	BART // BART1	AK075050	23568	ENSG00000102931	10.07	9.19	No
GSHG0007668	DUSP6	down	1.85	0.0396	chr12(-):89741839-89746280	UCSC	dual specificity phosphatase 6	MKP-3 // PYST1	BC037236	1848	ENSG00000139318	9.4	8.51	No
GSHG0006974	BTBD11	down	1.85	0.0339	chr12(+):107712198-108053419	UCSC	BTB (POZ) domain containing 11	FLJ33957	AK122818	121551	ENSG00000151136	7.82	6.93	Yes
GSHG0032226	---	down	1.85	0.00184	chrX(-):100446103-100446426	UCSC	---	---	DQ145510	---	---	8.32	7.43	No
GSHG0033333	---	down	1.84	0.000602	chr19(+):8386384-8387809	UCSC	---	---	AK293636	---	---	9.91	9.03	No
GSHG0012041	GINS2	down	1.84	7.67e-05	chr16(-):85711280-85722588	UCSC	GINS complex subunit 2 (Psf2 homolog)	Pfs2 // PSF2	BC003186	51659	ENSG00000131153	8.79	7.91	No
GSHG0007394	RACGAP1P	down	1.84	0.00338	chr12(-):45456401-45459194	UCSC	Rac GTPase activating protein 1 pseudogene	FKSG42	AF334184	83956	---	8.14	7.26	Yes
GSHG0004345	USMG5	down	1.84	0.0393	chr10(-):105148811-105156240	UCSC	up-regulated during skeletal muscle growth 5 homolog (mouse)	bA792D24.4 // DAPIT // MGC14697	AJ272056	84833	ENSG00000173915	10.71	9.83	No
GSHG0020992	TFG	down	1.84	0.00472	chr3(+):100428269-100467807	UCSC	TRK-fused gene	FLJ36137 // TF6	AK093456	10342	ENSG00000114354	9.54	8.67	No
GSHG0020027	APOBEC3G	down	1.84	0.0233	chr22(+):39473010-39483748	UCSC	apolipoprotein B mRNA editing enzyme, catalytic polypeptide-like 3G	bK150C2.7 // CEM15 // dJ494G10.1 // FLJ12740 // MDS019	AK092614	60489	ENSG00000239713	8.77	7.89	No
GSHG0018774	YWHAB	down	1.84	0.00838	chr20(+):43514347-43537161	UCSC	tyrosine 3-monooxygenase/tryptophan 5-monooxygenase activation protein, beta polypeptide	YWHAA	AL834170	7529	ENSG00000166913	10.88	9.99	No
GSHG0014085	PMAIP1	down	1.83	0.000784	chr18(+):57567228-57571537	UCSC	phorbol-12-myristate-13-acetate-induced protein 1	APR // NOXA	D90070	5366	ENSG00000141682	7.64	6.77	No
GSHG0009342	POLE2	down	1.83	0.00544	chr14(-):50110274-50155021	UCSC	polymerase (DNA directed), epsilon 2 (p59 subunit)	DPE2	BC126220	5427	ENSG00000100479	8.19	7.31	No
GSHG0009305	PPP2R3C	down	1.83	0.018	chr14(-):35554679-35591679	UCSC	protein phosphatase 2, regulatory subunit B'', gamma	C14orf10 // FLJ20644 // G4-1 // G5PR	AK293717	55012	ENSG00000092020	8.17	7.3	No
GSHG0031097	TNFSF8	down	1.83	0.00474	chr9(-):117665124-117692875	UCSC	tumor necrosis factor (ligand) superfamily, member 8	CD30LG // CD153	L09753	944	ENSG00000106952	8.78	7.91	No
GSHG0023497	MAD2L1	down	1.83	0.0439	chr4(-):120980577-120987988	UCSC	MAD2 mitotic arrest deficient-like 1 (yeast)	HSMAD2 // MAD2	AK298228	4085	ENSG00000164109	6.37	5.49	No
GSHG0009369	ERO1L	down	1.82	0.0154	chr14(-):53108607-53162432	UCSC	ERO1-like (S. cerevisiae)	ERO1-alpha // ERO1A	AF081886	30001	ENSG00000197930	8.91	8.04	No
GSHG0009320	TRAPPC6B	down	1.82	0.01	chr14(-):39617017-39639741	UCSC	trafficking protein particle complex 6B	---	BC030604	122553	ENSG00000182400	8.5	7.63	No
GSHG0006785	USP15	down	1.82	0.000142	chr12(+):62654138-62799898	UCSC	ubiquitin specific peptidase 15	KIAA0529 // UNPH4	AF106069	9958	ENSG00000135655	10.2	9.34	No
GSHG0005128	ACER3	down	1.82	0.00742	chr11(+):76571951-76733923	UCSC	alkaline ceramidase 3	PHCA // APHC // FLJ11238	AF327353	55331	ENSG00000078124	7.57	6.7	No
GSHG0029128	CPNE3	down	1.82	0.043	chr8(+):87526667-87573640	UCSC	copine III	---	BC066597	8895	ENSG00000085719	9.42	8.56	No
GSHG0016636	---	down	1.82	0.0342	chr2(+):86831130-86845885	UCSC	---	---	BC066991	---	---	7.38	6.51	No
GSHG0015684	---	down	1.82	0.00334	chr19(-):23404401-23433162	UCSC	---	---	AK301230	---	---	8.32	7.46	No
GSHG0014325	TXNL1	down	1.81	0.0272	chr18(-):54270053-54318505	UCSC	thioredoxin-like 1	TXNL // TRP32 // Txl	AK094926	9352	ENSG00000091164	9.45	8.59	No
GSHG0014278	PSTPIP2	down	1.81	0.00736	chr18(-):43563503-43652223	UCSC	proline-serine-threonine phosphatase interacting protein 2	---	BC035395	9050	ENSG00000152229	7.09	6.23	No
GSHG0008552	COMMD6	down	1.81	0.00848	chr13(-):76100432-76111985	UCSC	COMM domain containing 6	Acrg	BC171758	170622	ENSG00000188243	9.37	8.51	No
GSHG0008245	---	down	1.81	0.0336	chr13(+):99107675-99116049	UCSC	---	---	AF339785	---	---	6.37	5.51	No
GSHG0001171	BLZF1	down	1.81	0.0146	chr1(+):169337228-169365777	UCSC	basic leucine zipper nuclear factor 1	JEM-1	BC020716	8548	ENSG00000117475	9.81	8.95	No
GSHG0003904	RSU1	down	1.81	0.0245	chr10(-):16632619-16859435	UCSC	Ras suppressor protein 1	FLJ31034 // RSP-1	BX647733	6251	ENSG00000148484	10.39	9.54	No
GSHG0020682	CCR4	down	1.81	0.0162	chr3(+):32993066-32997836	UCSC	chemokine (C-C motif) receptor 4	CC-CKR-4 // CD194 // ChemR13 // CKR4 // CMKBR4 // k5-5	BC071751	1233	ENSG00000183813	9.02	8.16	No
GSHG0019583	SAMSN1	down	1.81	0.0044	chr21(-):15857549-15955723	UCSC	SAM domain, SH3 domain and nuclear localization signals 1	HACS1 // NASH1 // SASH2 // SH3D6B // SLy2	AF218085	64092	ENSG00000155307	7.99	7.14	No
GSHG0014304	ACAA2	down	1.8	0.0205	chr18(-):47309875-47340252	UCSC	acetyl-CoA acyltransferase 2	DSAEC	AK054673	10449	ENSG00000167315	8.89	8.05	No
GSHG0001838	---	down	1.8	0.0153	chr1(-):22691123-22692975	UCSC	---	---	AK057018	---	---	7.67	6.82	No
GSHG0009099	VRK1	down	1.8	0.0187	chr14(+):97263696-97347947	UCSC	vaccinia related kinase 1	---	AK290110	7443	ENSG00000100749	8.87	8.02	No
GSHG0025267	---	down	1.8	0.0401	chr5(-):172401482-172403056	UCSC	---	---	BC071728	---	---	6.33	5.48	No
GSHG0022302	---	down	1.8	0.019	chr3(-):186499570-186501968	UCSC	---	---	BC039344	---	---	6.91	6.06	No
GSHG0018280	SUMO1	down	1.8	0.00698	chr2(-):203070909-203103319	UCSC	SMT3 suppressor of mif two 3 homolog 1 (S. cerevisiae)	UBL1 // GMP1 // OFC10 // PIC1 // SMT3C // SMT3H3 // SUMO-1	U83117	7341	ENSG00000116030	8.58	7.74	No
GSHG0015761	ZNF260	down	1.8	0.0143	chr19(-):37001927-37019174	UCSC	zinc finger protein 260	ozrf1 // Zfp260	BC042676	339324	ENSG00000254004	9.34	8.49	No
GSHG0013617	---	down	1.79	0.0271	chr17(-):57915483-57916647	UCSC	---	---	BC024020	---	---	6.62	5.78	No
GSHG0012364	GOSR1	down	1.79	0.0273	chr17(+):28804426-28851218	UCSC	golgi SNAP receptor complex member 1	GOLIM2 // GOS-28 // GOS28 // GS28 // P28	BC040471	9527	ENSG00000108587	8.42	7.59	No
GSHG0009370	GNPNAT1	down	1.79	0.0143	chr14(-):53241912-53258319	UCSC	glucosamine-phosphate N-acetyltransferase 1	FLJ10607 // Gpnat1	AK090577	64841	ENSG00000100522	8.39	7.55	No
GSHG0007019	OAS2	down	1.79	0.0384	chr12(+):113416287-113449021	UCSC	2'-5'-oligoadenylate synthetase 2, 69/71kDa	---	M87434	4939	ENSG00000111335	8.42	7.59	No
GSHG0006900	MRPL42	down	1.79	0.0099	chr12(+):93861279-93896437	UCSC	mitochondrial ribosomal protein L42	HSPC204 // MRP-L31 // MRPL31 // MRPS32 // PTD007 // RPML31	CR749344	28977	ENSG00000198015	8.9	8.07	No
GSHG0003332	ZNF22	down	1.79	0.012	chr10(+):45495922-45500773	UCSC	zinc finger protein 22 (KOX 15)	HKR-T1 // KOX15 // Zfp422 // ZNF422	BC041139	7570	ENSG00000165512	9.42	8.58	No
GSHG0016054	SIGLEC10	down	1.79	0.00986	chr19(-):51913275-51921057	UCSC	sialic acid binding Ig-like lectin 10	MGC126774 // PRO940 // SIGLEC-10 // SLG2	AF311905	89790	ENSG00000142512	7.86	7.02	No
GSHG0003914	ST8SIA6	down	1.78	0.00338	chr10(-):17362732-17496386	UCSC	ST8 alpha-N-acetyl-neuraminide alpha-2,8-sialyltransferase 6	SIAT8F	BC144472	338596	ENSG00000148488	6.73	5.9	No
GSHG0030222	RMI1	down	1.78	0.00572	chr9(+):86595697-86618985	UCSC	RMI1, RecQ mediated genome instability 1, homolog (S. cerevisiae)	C9orf76 // BLAP75 // FLJ12888	BC039999	80010	ENSG00000178966	8	7.17	No
GSHG0025520	HIST1H4I	down	1.78	0.00124	chr6(+):27107055-27108285	UCSC	histone cluster 1, H4i	H4FM // H4/m	BC016336	8294	ENSG00000198339	9.13	8.29	No
GSHG0000374	---	down	1.77	0.0444	chr1(+):35471628-35473193	UCSC	---	---	BC043174	---	---	7.23	6.41	No
GSHG0012121	SRR	down	1.77	0.0285	chr17(+):2206677-2228553	UCSC	serine racemase	ILV1 // ISO1	AK023169	63826	ENSG00000167720	8.08	7.25	No
GSHG0010679	---	down	1.77	0.0233	chr15(-):83802872-83805473	UCSC	---	---	AK055438	---	---	7.49	6.67	No
GSHG0009846	PLDN	down	1.77	0.0381	chr15(+):45879417-45901908	UCSC	pallidin homolog (mouse)	PA	AK128626	26258	ENSG00000104164	8.02	7.2	No
GSHG0031637	PGK1	down	1.77	0.013	chrX(+):77359743-77382322	UCSC	phosphoglycerate kinase 1	---	AB062432	5230	ENSG00000102144	11.04	10.21	No
GSHG0002709	CREG1	down	1.77	0.00582	chr1(-):167510253-167525983	UCSC	cellular repressor of E1A-stimulated genes 1	CREG	AK075375	8804	ENSG00000143162	8.44	7.61	No
GSHG0016067	ZNF615	down	1.77	0.0162	chr19(-):52494586-52511483	UCSC	zinc finger protein 615	FLJ33710	BC053884	284370	ENSG00000197619	6.77	5.95	No
GSHG0009902	CCNB2	down	1.76	0.00476	chr15(+):59397320-59417249	UCSC	cyclin B2	HsT17299	AK001404	9133	ENSG00000157456	10	9.19	No
GSHG0008392	UBL3	down	1.76	0.0406	chr13(-):30338542-30424715	UCSC	ubiquitin-like 3	PNSC1 // DKFZP434K151 // FLJ32018 // HCG-1	BC044582	5412	ENSG00000122042	6.83	6.01	No
GSHG0008348	ZDHHC20	down	1.76	0.00672	chr13(-):21928048-22033516	UCSC	zinc finger, DHHC-type containing 20	FLJ25952	BC034944	253832	ENSG00000180776	10.43	9.61	No
GSHG0007691	NDUFA12	down	1.76	0.0441	chr12(-):95365172-95397468	UCSC	NADH dehydrogenase (ubiquinone) 1 alpha subcomplex, 12	B17.2 // DAP13	AF217092	55967	ENSG00000184752	10.73	9.91	No
GSHG0003659	INA	down	1.76	0.017	chr10(+):105036920-105050106	UCSC	internexin neuronal intermediate filament protein, alpha	NEF5 // NF-66	BC006359	9118	ENSG00000148798	7.12	6.3	No
GSHG0028342	---	down	1.76	0.000837	chr7(-):89975224-89975532	UCSC	---	---	EF212284	---	---	6.78	5.96	No
GSHG0024278	CXXC5	down	1.76	0.0398	chr5(+):139027877-139063465	UCSC	CXXC finger protein 5	HSPC195 // RINF // WID	BC006428	51523	ENSG00000171604	8.68	7.87	No
GSHG0014762	ZNF730	down	1.75	0.00666	chr19(+):23299777-23332763	UCSC	zinc finger protein 730	---	AK131472	100129543	ENSG00000183850	9.53	8.72	No
GSHG0010473	ANXA2	down	1.75	0.0167	chr15(-):60639536-60690191	UCSC	annexin A2	ANX2 // ANX2L4 // CAL1H // LPC2D // LIP2	BC016774	302	ENSG00000182718	9.57	8.77	No
GSHG0009875	MAPK6	down	1.75	0.0428	chr15(+):52311433-52358461	UCSC	mitogen-activated protein kinase 6	PRKM6 // ERK3 // HsT17250 // p97MAPK	CR749401	5597	ENSG00000069956	9.06	8.26	Yes
GSHG0007350	ERGIC2	down	1.75	0.0184	chr12(-):29490288-29534100	UCSC	ERGIC and golgi 2	Erv41 // PTX1	AL834128	51290	ENSG00000087502	9.09	8.28	No
GSHG0003552	KIF20B	down	1.75	0.0175	chr10(+):91461367-91534700	UCSC	kinesin family member 20B	MPHOSPH1 // CT90 // KRMP1 // MPP1	AB033337	9585	ENSG00000138182	8.37	7.56	No
GSHG0019389	USP16	down	1.75	0.0273	chr21(+):30396972-30426811	UCSC	ubiquitin specific peptidase 16	Ubp-M	AK294284	10600	ENSG00000156256	8.92	8.11	No
GSHG0018591	DSTN	down	1.75	0.0263	chr20(+):17550693-17588649	UCSC	destrin (actin depolymerizing factor)	ACTDP // ADF	BX647319	11034	ENSG00000125868	10.24	9.43	No
GSHG0018553	CRLS1	down	1.75	0.00718	chr20(+):5986796-6020689	UCSC	cardiolipin synthase 1	C20orf155 // CLS1 // dJ967N21.6 // GCD10	AL832419	54675	ENSG00000088766	8.75	7.94	No
GSHG0018159	OLA1	down	1.75	0.0199	chr2(-):174937177-175113365	UCSC	Obg-like ATPase 1	GTPBP9 // PTD004	AL136546	29789	ENSG00000138430	10.35	9.54	No
GSHG0002208	GNG5	down	1.74	0.00382	chr1(-):84967528-84971887	UCSC	guanine nucleotide binding protein (G protein), gamma 5	---	AK312111	2787	ENSG00000174021	9.82	9.02	Yes
GSHG0014592	ZNF627	down	1.74	0.0268	chr19(+):11708264-11729974	UCSC	zinc finger protein 627	FLJ90365	BC098416	199692	ENSG00000198551	7.51	6.71	No
GSHG0007382	ZCRB1	down	1.74	0.007	chr12(-):42705889-42719932	UCSC	zinc finger CCHC-type and RNA binding motif 1	MADP-1 // MADP1 // RBM36 // ZCCHC19	BC022543	85437	ENSG00000139168	9.19	8.39	No
GSHG0003762	FAM175B	down	1.74	0.0132	chr10(+):126490382-126525236	UCSC	family with sequence similarity 175, member B	KIAA0157 // ABRO1 // Em:AC068896.4	D63877	23172	ENSG00000165660	8.61	7.81	No
GSHG0029859	FAM49B	down	1.74	0.00662	chr8(-):130853718-131028697	UCSC	family with sequence similarity 49, member B	BM-009	AK002059	51571	ENSG00000153310	9.72	8.92	No
GSHG0029653	STAU2	down	1.74	0.0391	chr8(-):74332604-74659943	UCSC	staufen, RNA binding protein, homolog 2 (Drosophila)	39K2	AK002152	27067	ENSG00000040341	10.72	9.92	No
GSHG0029083	TERF1	down	1.74	0.0211	chr8(+):73908424-73959727	UCSC	telomeric repeat binding factor (NIMA-interacting) 1	TRBF1 // PIN2 // TRF // TRF1	DQ895789	7013	ENSG00000147601	9.14	8.34	No
GSHG0025049	---	down	1.74	0.0112	chr5(-):131973740-131991846	UCSC	---	---	BC042122	---	---	6.49	5.69	No
GSHG0009923	RAB8B	down	1.73	0.0107	chr15(+):63481733-63558252	UCSC	RAB8B, member RAS oncogene family	---	AK095444	51762	ENSG00000166128	9.51	8.72	No
GSHG0009569	TC2N	down	1.73	0.025	chr14(-):92246526-92333857	UCSC	tandem C2 domains, nuclear	C14orf47 // MTAC2D1 // C2CD1 // FLJ36557 // Tac2-N	AX748346	123036	ENSG00000165929	7.94	7.15	No
GSHG0009070	UBR7	down	1.73	0.0108	chr14(+):93673416-93695560	UCSC	ubiquitin protein ligase E3 component n-recognin 7 (putative)	C14orf130	BC015046	55148	ENSG00000012963	8.26	7.47	No
GSHG0008881	---	down	1.73	0.011	chr14(+):60574298-60575499	UCSC	---	---	BC030714	---	---	9.16	8.37	No
GSHG0006845	RAB21	down	1.73	0.0449	chr12(+):72148654-72182536	UCSC	RAB21, member RAS oncogene family	KIAA0118	AF091035	23011	ENSG00000080371	8.09	7.29	No
GSHG0005283	PAFAH1B2	down	1.73	0.0019	chr11(+):117015008-117048887	UCSC	platelet-activating factor acetylhydrolase 1b, catalytic subunit 2 (30kDa)	---	DQ836740	5049	ENSG00000168092	9.04	8.25	No
GSHG0003818	IDI1	down	1.73	0.029	chr10(-):1085850-1102644	UCSC	isopentenyl-diphosphate delta isomerase 1	---	BC057827	3422	ENSG00000067064	8.33	7.53	Yes
GSHG0003563	HHEX	down	1.73	0.0424	chr10(+):94448636-94455404	UCSC	hematopoietically expressed homeobox	PRHX // HEX // HOX11L-PEN	EU446478	3087	ENSG00000152804	6.83	6.04	No
GSHG0028980	C8orf40	down	1.73	0.0405	chr8(+):42397193-42407751	UCSC	chromosome 8 open reading frame 40	---	AK311932	114926	ENSG00000176209	8.57	7.78	No
GSHG0016349	WDR43	down	1.73	0.00572	chr2(+):29117536-29171084	UCSC	WD repeat domain 43	KIAA0007 // NET12 // UTP5	D26488	23160	ENSG00000163811	9.24	8.45	No
GSHG0010440	CCPG1 // DYX1C1	down	1.72	0.00958	chr15(-):55647447-55800432	UCSC	cell cycle progression 1 // dyslexia susceptibility 1 candidate 1	CPR8 // EKN1 // FLJ37882 // KIAA1254	BC051725	161582 // 9236	---	6.34	5.56	No
GSHG0009457	COX16	down	1.72	0.0141	chr14(-):70791799-70826448	UCSC	COX16 cytochrome c oxidase assembly homolog (S. cerevisiae)	C14orf112 // HSPC203	FJ460510	51241	ENSG00000133983	10.16	9.38	No
GSHG0008983	C14orf45	down	1.72	0.00736	chr14(+):74486120-74549566	UCSC	chromosome 14 open reading frame 45	---	AK097531	80127	ENSG00000119636	7.02	6.24	No
GSHG0008010	POLR1D	down	1.72	0.00172	chr13(+):28195083-28241547	UCSC	polymerase (RNA) I polypeptide D, 16kDa	MGC9850 // RPA16 // RPA9 // RPAC2 // RPO1-3	AK307356	51082	ENSG00000186184	10.11	9.34	No
GSHG0007636	KRR1	down	1.72	0.033	chr12(-):75891421-75905413	UCSC	KRR1, small subunit (SSU) processome component, homolog (yeast)	HRB2 // RIP-1	BC033887	11103	ENSG00000111615	9.2	8.42	No
GSHG0032037	DYNLT3	down	1.72	0.0202	chrX(-):37698089-37706831	UCSC	dynein, light chain, Tctex-type 3	TCTE1L // TCTEX1L	U02556	6990	ENSG00000165169	7.35	6.57	No
GSHG0031583	---	down	1.72	0.0352	chrX(+):65235303-65240264	UCSC	---	---	DQ680072	---	---	7.66	6.88	No
GSHG0030470	---	down	1.72	0.0307	chr9(+):130703895-130704144	UCSC	---	---	AF086096	---	---	7.4	6.62	No
GSHG0030092	---	down	1.72	0.00386	chr9(+):35001910-35003660	UCSC	---	---	AK093248	---	---	6.4	5.61	No
GSHG0027384	ZNF107	down	1.72	0.0198	chr7(+):64126500-64171399	UCSC	zinc finger protein 107	ZNF588 // smap-7 // ZFD25	BC047243	51427	ENSG00000196247	9.71	8.92	No
GSHG0001996	GJA9 // MYCBP // RRAGC	down	1.71	0.0114	chr1(-):39303874-39347293	UCSC	gap junction protein, alpha 9, 59kDa // c-myc binding protein // Ras-related GTP binding C	GJA10 // AMY-1 // CX58 // CX59 // FLJ13311 // GTR2	BC044622	26292 // 64121 // 81025	ENSG00000116954 // ENSG00000131233 // ENSG00000214114	8.46	7.69	No
GSHG0013024	C1QBP	down	1.71	0.00922	chr17(-):5336099-5342471	UCSC	complement component 1, q subcomponent binding protein	HABP1 // gC1Q-R // gC1qR // p32 // SF2p32	L04636	708	ENSG00000108561	8.94	8.17	No
GSHG0012699	VMP1	down	1.71	0.0321	chr17(+):57785003-57954207	UCSC	vacuole membrane protein 1	TMEM49 // EPG3	AM393627	81671	ENSG00000062716	9.95	9.18	No
GSHG0010400	COPS2	down	1.71	0.0108	chr15(-):49419542-49447801	UCSC	COP9 constitutive photomorphogenic homolog subunit 2 (Arabidopsis)	ALIEN // CSN2 // TRIP15	AF084260	9318	ENSG00000166200	9.5	8.73	No
GSHG0008075	DNAJC15	down	1.71	0.0102	chr13(+):43597339-43683300	UCSC	DnaJ (Hsp40) homolog, subfamily C, member 15	DNAJD1 // MCJ	BC095400	29103	ENSG00000120675	10.39	9.61	No
GSHG0008061	---	down	1.71	0.0139	chr13(+):41506168-41506761	UCSC	---	---	AF085832	---	---	6.55	5.77	No
GSHG0007683	UBE2N	down	1.71	0.00138	chr12(-):93803134-93835752	UCSC	ubiquitin-conjugating enzyme E2N	MGC8489 // UBC13 // UbcH-ben	BC000396	7334	ENSG00000177889	10.5	9.73	No
GSHG0030635	---	down	1.71	0.0321	chr9(-):2192967-2193572	UCSC	---	---	AY295762	---	---	5.84	5.06	No
GSHG0029725	CCNE2	down	1.71	0.0295	chr8(-):95892467-95907429	UCSC	cyclin E2	CYCE2	BC007015	9134	ENSG00000175305	8.87	8.09	No
GSHG0027533	ACN9	down	1.71	0.0325	chr7(+):96745895-96811073	UCSC	ACN9 homolog (S. cerevisiae)	DC11	BC028409	57001	ENSG00000196636	8.78	8.01	No
GSHG0018585	SNRPB2	down	1.71	0.0315	chr20(+):16710657-16721863	UCSC	small nuclear ribonucleoprotein polypeptide B	Msl1	BC018022	6629	ENSG00000125870	9.53	8.76	Yes
GSHG0014759	ZNF257	down	1.7	0.0322	chr19(+):22235254-22273901	UCSC	zinc finger protein 257	BMZF-4	BC036446	113835	ENSG00000197134	7.15	6.39	No
GSHG0009332	MIS18BP1	down	1.7	0.0242	chr14(-):45672394-45722605	UCSC	MIS18 binding protein 1	C14orf106 // FLJ11186 // KIAA1903 // KNL2 // M18BP1	BC065544	55320	ENSG00000129534	8.82	8.05	No
GSHG0006711	COPZ1	down	1.7	0.0388	chr12(+):54718911-54745634	UCSC	coatomer protein complex, subunit zeta 1	COPZ // CGI-120	AF151878	22818	ENSG00000111481	9.69	8.92	No
GSHG0029034	SDCBP	down	1.7	0.0188	chr8(+):59465728-59495417	UCSC	syndecan binding protein (syntenin)	SYCL	AF000652	6386	ENSG00000137575	9.8	9.04	No
GSHG0024769	---	down	1.7	0.0363	chr5(-):43573287-43575781	UCSC	---	---	BC012288	---	---	8.45	7.69	Yes
GSHG0015670	ZNF43	down	1.7	0.0142	chr19(-):21990085-22034830	UCSC	zinc finger protein 43	ZNF39L1 // HTF6 // KOX27	CR933640	7594	ENSG00000198521	9.33	8.57	No
GSHG0011643	CPPED1	down	1.69	0.00478	chr16(-):12756937-12897741	UCSC	calcineurin-like phosphoesterase domain containing 1	CSTP1 // FLJ11151	AK093854	55313	ENSG00000103381	7.46	6.7	No
GSHG0009943	RAB11A	down	1.69	0.0415	chr15(+):66161786-66181791	UCSC	RAB11A, member RAS oncogene family	YL8	AF000231	8766	ENSG00000103769	10.56	9.8	No
GSHG0009864	USP8	down	1.69	0.0109	chr15(+):50716579-50791971	UCSC	ubiquitin specific peptidase 8	HumORF8 // KIAA0055 // UBPY	BX537420	9101	ENSG00000138592	7.74	6.99	No
GSHG0007255	KLRAP1	down	1.69	0.0112	chr12(-):10741382-10752268	UCSC	killer cell lectin-like receptor subfamily A pseudogene 1	KLRA1 // Ly49 // LY49L	AK310151	10748	ENSG00000256667	6.37	5.62	No
GSHG0006823	RAP1B	down	1.69	0.049	chr12(+):69004687-69054300	UCSC	RAP1B, member of RAS oncogene family	DKFZp586H0723 // K-REV // RAL1B	AJ420497	5908	ENSG00000127314	9.92	9.16	No
GSHG0006531	GOLT1B	down	1.69	0.0165	chr12(+):21654715-21671091	UCSC	golgi transport 1B	CGI-141 // GOT1 // YMR292W	AB097020	51026	ENSG00000111711	7.29	6.53	No
GSHG0031207	C9orf78	down	1.69	0.00814	chr9(-):132589571-132597560	UCSC	chromosome 9 open reading frame 78	HSPC220	AK057004	51759	ENSG00000136819	9.64	8.88	No
GSHG0021280	MFSD1	down	1.69	0.0207	chr3(+):158519715-158547507	UCSC	major facilitator superfamily domain containing 1	FLJ14153 // UG0581B09	BC030542	64747	ENSG00000118855	8.32	7.56	No
GSHG0002477	HIST2H2AB // HIST2H2BE	down	1.69	0.0386	chr1(-):149856012-149859515	UCSC	histone cluster 2, H2ab // histone cluster 2, H2be	H2B // H2BFQ // H2B.1 // H2B/q	AK289725	317772 // 8349	ENSG00000184270 // ENSG00000184678	9.59	8.83	Yes
GSHG0014244	B4GALT6	down	1.68	0.0122	chr18(-):29202210-29264686	UCSC	UDP-Gal:betaGlcNAc beta 1,4- galactosyltransferase, polypeptide 6	beta4GalT-VI	AF097159	9331	ENSG00000118276	9.73	8.98	No
GSHG0010525	DENND4A	down	1.68	0.0257	chr15(-):65952960-66084631	UCSC	DENN/MADD domain containing 4A	MYCPBP // IRLB	AL833317	10260	ENSG00000174485	8.99	8.24	No
GSHG0009969	KIF23	down	1.68	0.0209	chr15(+):69706643-69740756	UCSC	kinesin family member 23	KNSL5 // MKLP-1 // MKLP1	BC051826	9493	ENSG00000137807	9.25	8.49	No
GSHG0009418	PPP2R5E	down	1.68	0.0286	chr14(-):63841426-64010101	UCSC	protein phosphatase 2, regulatory subunit B', epsilon isoform	---	BC034994	5529	ENSG00000154001	8.27	7.52	No
GSHG0008155	TDRD3	down	1.68	0.0433	chr13(+):60970591-61148011	UCSC	tudor domain containing 3	FLJ21007	BX537910	81550	ENSG00000083544	8.55	7.8	No
GSHG0008121	---	down	1.68	0.0457	chr13(+):50746154-50747752	UCSC	---	---	AF539468	---	---	8.81	8.06	Yes
GSHG0006901	SOCS2	down	1.68	0.0316	chr12(+):93963761-93969982	UCSC	suppressor of cytokine signaling 2	CIS2 // Cish2 // SOCS-2 // SSI-2 // SSI2 // STATI2	AK313165	8835	ENSG00000120833	7.79	7.04	No
GSHG0006141	CASP1	down	1.68	0.0288	chr11(-):104896246-105386724	UCSC	caspase 1, apoptosis-related cysteine peptidase (interleukin 1, beta, convertase)	IL1BC // ICE	AK128199	834	ENSG00000137752	7.02	6.27	No
GSHG0003869	NUDT5	down	1.68	0.0156	chr10(-):12209351-12238128	UCSC	nudix (nucleoside diphosphate linked moiety X)-type motif 5	hYSAH1 // YSA1H	AF218818	11164	ENSG00000165609	8.69	7.94	No
GSHG0003728	---	down	1.68	0.042	chr10(+):120928760-120930106	UCSC	---	---	AF118073	---	---	5.81	5.06	No
GSHG0032698	PRUNE2	down	1.68	0.0253	chr9(-):79226293-79521003	UCSC	prune homolog 2 (Drosophila)	C9orf65 // KIAA0367 // A214N16.3 // bA214N16.3 // BMCC1 // BNIPXL	FJ808773	158471	ENSG00000106772	7.17	6.42	No
GSHG0029784	NUDCD1	down	1.68	0.0153	chr8(-):110253149-110346471	UCSC	NudC domain containing 1	CML66 // FLJ14991	BC043406	84955	ENSG00000120526	8.29	7.54	No
GSHG0026648	SUPT3H	down	1.68	0.00992	chr6(-):44796472-45345778	UCSC	suppressor of Ty 3 homolog (S. cerevisiae)	SPT3 // SPT3L	BC050384	8464	ENSG00000196284	8.77	8.02	No
GSHG0002936	NEK2	down	1.68	0.0172	chr1(-):211831601-211848967	UCSC	NIMA (never in mitosis gene a)-related kinase 2	NEK2A // NLK1	AK225522	4751	ENSG00000117650	8.24	7.49	No
GSHG0020607	LSM3	down	1.68	0.00458	chr3(+):14220331-14239854	UCSC	LSM3 homolog, U6 small nuclear RNA associated (S. cerevisiae)	SMX4 // USS2 // YLR438C	AF182418	27258	ENSG00000170860	9.86	9.11	No
GSHG0015014	---	down	1.67	0.0457	chr19(+):45798568-45800306	UCSC	---	---	AK022239	---	---	6.44	5.7	No
GSHG0013037	---	down	1.67	0.00074	chr17(-):6919141-6922978	UCSC	---	---	AK098506	---	---	7.22	6.48	No
GSHG0009940	PTPLAD1	down	1.67	0.0297	chr15(+):65822804-65870683	UCSC	protein tyrosine phosphatase-like A domain containing 1	B-ind1 // HSPC121	AK074898	51495	ENSG00000074696	9.2	8.47	No
GSHG0009382	---	down	1.67	0.0478	chr14(-):55534145-55536912	UCSC	---	---	AK096674	---	---	6.45	5.71	No
GSHG0007158	ZNF140	down	1.67	0.00606	chr12(+):133656788-133684112	UCSC	zinc finger protein 140	pHZ-39	AK122741	7699	ENSG00000196387	7.74	7	No
GSHG0006727	BLOC1S1 // RDH5	down	1.67	0.0049	chr12(+):56109821-56118489	UCSC	biogenesis of lysosomal organelles complex-1, subunit 1 // retinol dehydrogenase 5 (11-cis/9-cis)	GCN5L1 // RDH1 // BLOS1 // HSD17B9 // SDR9C5	AK096656	2647 // 5959	ENSG00000135437 // ENSG00000135441	8.53	7.79	No
GSHG0006066	CCDC90B	down	1.67	0.0347	chr11(-):82972359-82997418	UCSC	coiled-coil domain containing 90B	MDS011 // MDS025	AK304769	60492	ENSG00000137500	7.66	6.92	No
GSHG0006046	ALG8	down	1.67	0.0139	chr11(-):77811988-77850699	UCSC	asparagine-linked glycosylation 8, alpha-1,3-glucosyltransferase homolog (S. cerevisiae)	MGC2840	AK098614	79053	ENSG00000159063	9.74	8.99	No
GSHG0004398	FAM204A	down	1.67	0.00292	chr10(-):120068572-120101832	UCSC	family with sequence similarity 204, member A	C10orf84 // bA319I23.1 // FLJ13188	AK023250	63877	ENSG00000165669	8.49	7.75	No
GSHG0018186	FKBP7	down	1.67	0.0026	chr2(-):179329666-179343302	UCSC	FK506 binding protein 7	FKBP23	AK292145	51661	ENSG00000079150	7.67	6.92	No
GSHG0017963	MKI67IP	down	1.67	0.0195	chr2(-):122484554-122494480	UCSC	MKI67 (FHA domain) interacting nucleolar phosphoprotein	NIFK // Nopp34	BC024238	84365	ENSG00000155438	8.74	8	No
GSHG0014740	ZNF93	down	1.66	0.0035	chr19(+):20011755-20046382	UCSC	zinc finger protein 93	ZNF505 // FLJ12488 // HPF34 // TF34	AK096342	81931	ENSG00000184635	8.72	7.98	No
GSHG0013677	PSMD12	down	1.66	0.0159	chr17(-):65334033-65362721	UCSC	proteasome (prosome, macropain) 26S subunit, non-ATPase, 12	p55 // Rpn5	AB003103	5718	ENSG00000197170	7.56	6.82	No
GSHG0012812	MRPS7	down	1.66	0.0157	chr17(+):73257785-73262454	UCSC	mitochondrial ribosomal protein S7	MRP-S // RP-S7 // RPMS7	BC000241	51081	ENSG00000125445	9.15	8.42	No
GSHG0006491	CREBL2	down	1.66	0.0197	chr12(+):12764826-12798041	UCSC	cAMP responsive element binding protein-like 2	---	BC106052	1389	ENSG00000111269	9.55	8.82	No
GSHG0003970	MTPAP	down	1.66	0.0241	chr10(-):30601759-30723387	UCSC	mitochondrial poly(A) polymerase	PAPD1 // FLJ10486 // mtPAP	AK309583	55149	ENSG00000107951	8.5	7.77	No
GSHG0031772	DOCK11	down	1.66	0.025	chrX(+):117629872-117820123	UCSC	dedicator of cytokinesis 11	FLJ32122 // FLJ43653 // ZIZ2	AY692226	139818	ENSG00000147251	8.59	7.86	No
GSHG0029816	TAF2	down	1.66	0.0321	chr8(-):120743015-120845103	UCSC	TAF2 RNA polymerase II, TATA box binding protein (TBP)-associated factor, 150kDa	TAF2B // CIF150 // TAFII150	AF026445	6873	ENSG00000064313	9	8.27	No
GSHG0029689	C8orf59	down	1.66	0.0294	chr8(-):86126287-86132607	UCSC	chromosome 8 open reading frame 59	---	BC055092	401466	ENSG00000176731	6.81	6.08	No
GSHG0029427	CNOT7	down	1.66	0.0054	chr8(-):17086740-17104387	UCSC	CCR4-NOT transcription complex, subunit 7	CAF1	BC060852	29883	ENSG00000198791	10.09	9.36	No
GSHG0014739	ZNF253	down	1.65	0.0209	chr19(+):19976709-20008579	UCSC	zinc finger protein 253	ZNF411 // BMZF-1 // FLJ90391	AK074757	56242	ENSG00000256771	9.59	8.86	No
GSHG0012757	---	down	1.65	0.0165	chr17(+):66097696-66122027	UCSC	---	---	BC045718	---	---	6.91	6.19	Yes
GSHG0010504	FAM96A	down	1.65	0.0067	chr15(-):64364763-64386149	UCSC	family with sequence similarity 96, member A	FLJ22875	BC008865	84191	ENSG00000166797	8.39	7.67	No
GSHG0007557	PTGES3	down	1.65	0.0271	chr12(-):57057136-57082159	UCSC	prostaglandin E synthase 3 (cytosolic)	cPGES // p23 // TEBP	AK098214	10728	ENSG00000110958	10.2	9.48	No
GSHG0007416	SENP1	down	1.65	0.0243	chr12(-):48436681-48500091	UCSC	SUMO1/sentrin specific peptidase 1	---	BX640784	29843	ENSG00000079387	9.99	9.26	No
GSHG0005243	C11orf1	down	1.65	0.00734	chr11(+):111750261-111756698	UCSC	chromosome 11 open reading frame 1	FLJ23499	AK027152	64776	ENSG00000137720	7.56	6.84	No
GSHG0031932	---	down	1.65	0.00694	chrX(+):154255107-154283846	UCSC	---	---	AJ272054	---	---	9.32	8.6	No
GSHG0030810	---	down	1.65	0.0362	chr9(-):37636934-37637093	UCSC	---	---	U66622	---	---	8.52	7.8	Yes
GSHG0029655	UBE2W	down	1.65	0.0154	chr8(-):74692332-74791145	UCSC	ubiquitin-conjugating enzyme E2W (putative)	FLJ11011	BC010900	55284	ENSG00000104343	8.55	7.82	No
GSHG0003289	ZEB1	down	1.65	0.0222	chr10(+):31607423-31818127	UCSC	zinc finger E-box binding homeobox 1	PPCD3 // TCF8 // AREB6 // BZP // NIL-2-A // ZEB // Zfhep // Zfhx1a	BX647794	6935	ENSG00000148516	10.23	9.51	No
GSHG0024406	PPP1R2P3	down	1.65	0.0276	chr5(+):156277497-156279539	UCSC	protein phosphatase 1, regulatory (inhibitor) subunit 2 pseudogene 3	MGC87149	BC066922	153743	ENSG00000231989	6.84	6.11	Yes
GSHG0022606	SRP72	down	1.65	0.0452	chr4(+):57333774-57369847	UCSC	signal recognition particle 72kDa	---	AF038851	6731	ENSG00000174780	10.07	9.36	No
GSHG0015146	ZNF480	down	1.64	0.00554	chr19(+):52800422-52829179	UCSC	zinc finger protein 480	MGC32104	AK096559	147657	ENSG00000198464	9.33	8.61	No
GSHG0011639	GSPT1	down	1.64	0.0162	chr16(-):11966539-12009939	UCSC	G1 to S phase transition 1	eRF3a // ETF3A // GST1	X17644	2935	ENSG00000103342	9.94	9.23	No
GSHG0009766	EIF2AK4	down	1.64	0.00246	chr15(+):40226347-40327797	UCSC	eukaryotic translation initiation factor 2 alpha kinase 4	GCN2 // KIAA1338	AB527135	440275	ENSG00000128829	7.6	6.89	No
GSHG0008052	EXOSC8	down	1.64	0.0331	chr13(+):37572388-37583535	UCSC	exosome component 8	bA421P11.3 // CIP3 // EAP2 // OIP2 // p9 // RRP43 // Rrp43p	DQ896414	11340	ENSG00000120699	8.36	7.65	No
GSHG0007776	GPN3	down	1.64	0.0474	chr12(-):110890292-110906070	UCSC	GPN-loop GTPase 3	ATPBD1C // MGC14560	BC008416	51184	ENSG00000111231	7.73	7.02	Yes
GSHG0000812	DDX20	down	1.64	0.00728	chr1(+):112298219-112310196	UCSC	DEAD (Asp-Glu-Ala-Asp) box polypeptide 20	DP103 // GEMIN3	BC034953	11218	ENSG00000064703	8.49	7.78	No
GSHG0032361	MMGT1	down	1.64	0.0132	chrX(-):135044231-135056188	UCSC	membrane magnesium transporter 1	TMEM32	BC033588	93380	ENSG00000169446	9.01	8.3	No
GSHG0026217	---	down	1.64	0.0449	chr6(+):168775377-168776033	UCSC	---	---	AF086421	---	---	7.32	6.61	No
GSHG0022733	MMRN1	down	1.64	0.0292	chr4(+):90816003-90875759	UCSC	multimerin 1	MMRN // ECM // EMILIN4 // GPIa*	AK125557	22915	ENSG00000138722	6.86	6.14	No
GSHG0020028	APOBEC3H	down	1.64	0.0172	chr22(+):39493244-39500070	UCSC	apolipoprotein B mRNA editing enzyme, catalytic polypeptide-like 3H	ARP10	BC069023	164668	ENSG00000100298	7.33	6.62	No
GSHG0002101	TXNDC12	down	1.63	0.0439	chr1(-):52485806-52521843	UCSC	thioredoxin domain containing 12 (endoplasmic reticulum)	AGR1 // ERP18 // ERP19 // hAG-1 // PDIA16 // TLP19	AK056169	51060	ENSG00000117862	9.73	9.02	No
GSHG0013349	TOP2A	down	1.63	0.0206	chr17(-):38545003-38574169	UCSC	topoisomerase (DNA) II alpha 170kDa	TOP2	BC140791	7153	ENSG00000131747	10.87	10.17	No
GSHG0013283	---	down	1.63	0.0259	chr17(-):34218741-34219673	UCSC	---	---	AK002187	---	---	6.64	5.94	Yes
GSHG0012521	PSME3	down	1.63	0.0342	chr17(+):40976443-40995523	UCSC	proteasome (prosome, macropain) activator subunit 3 (PA28 gamma; Ki)	Ki // PA28-gamma // PA28G // REG-GAMMA	AK057221	10197	ENSG00000131467	9.73	9.02	No
GSHG0010237	UBE3A	down	1.63	0.0412	chr15(-):25584271-25684182	UCSC	ubiquitin protein ligase E3A	EPVE6AP // HPVE6A // ANCR // AS // E6-AP // FLJ26981	BC002582	7337	ENSG00000114062	8.5	7.79	No
GSHG0009581	C14orf142	down	1.63	0.018	chr14(-):93669237-93673439	UCSC	chromosome 14 open reading frame 142	---	BC021733	84520	ENSG00000170270	7.96	7.26	No
GSHG0009432	ATP6V1D	down	1.63	0.0152	chr14(-):67802647-67826654	UCSC	ATPase, H+ transporting, lysosomal 34kDa, V1 subunit D	ATP6M // VATD // VMA8	AK001155	51382	ENSG00000100554	7.28	6.58	No
GSHG0008347	SKA3	down	1.63	0.0146	chr13(-):21727734-21750712	UCSC	spindle and kinetochore associated complex subunit 3	C13orf3 // MGC4832 // RAMA1	BC013418	221150	ENSG00000165480	10.1	9.4	No
GSHG0007655	CCDC59	down	1.63	0.0275	chr12(-):82746620-82752178	UCSC	coiled-coil domain containing 59	BR22 // HSPC128 // TAP26	AF161477	29080	ENSG00000133773	8.15	7.45	No
GSHG0006930	SCYL2	down	1.63	0.0403	chr12(+):100660955-100735501	UCSC	SCY1-like 2 (S. cerevisiae)	KIAA1360	BC063798	55681	ENSG00000136021	8.84	8.13	No
GSHG0006838	CNOT2	down	1.63	0.00788	chr12(+):70636810-70748768	UCSC	CCR4-NOT transcription complex, subunit 2	NOT2 // CDC36 // NOT2H	AF044215	4848	ENSG00000111596	10.3	9.59	No
GSHG0004906	---	down	1.63	0.006	chr11(+):61382508-61406921	UCSC	---	---	AK095332	---	---	9.98	9.27	No
GSHG0029795	RAD21	down	1.63	0.0104	chr8(-):117858174-117887001	UCSC	RAD21 homolog (S. pombe)	hHR21 // KIAA0078 // SCC1	D38551	5885	ENSG00000164754	9.95	9.24	No
GSHG0003361	NCOA4	down	1.63	0.0206	chr10(+):51565162-51590733	UCSC	nuclear receptor coactivator 4	ARA70 // DKFZp762E1112 // ELE1 // PTC3 // RFG	BC001562	8031	ENSG00000138293	10.23	9.52	No
GSHG0019465	TTC3	down	1.63	0.0196	chr21(+):38445571-38575406	UCSC	tetratricopeptide repeat domain 3	DCRR1 // RNF105 // TPRD // TPRDI // TPRDII // TPRDIII	D83077	7267	ENSG00000182670	9.52	8.82	No
GSHG0000414	ZMPSTE24	down	1.63	0.0412	chr1(+):40723775-40759851	UCSC	zinc metallopeptidase (STE24 homolog, S. cerevisiae)	FACE-1 // HGPS // PRO1 // STE24 // Ste24p	AK075007	10269	ENSG00000084073	8.73	8.02	No
GSHG0014334	LMAN1	down	1.62	0.00932	chr18(-):56997108-57026498	UCSC	lectin, mannose-binding, 1	F5F8D // ERGIC-53 // ERGIC53 // FMFD1 // gp58 // MCFD1 // MR60	X71661	3998	ENSG00000074695	9.5	8.8	No
GSHG0014030	HAUS1	down	1.62	0.0143	chr18(+):43684298-43708298	UCSC	HAUS augmin-like complex, subunit 1	CCDC5 // FLJ40084 // HEI-C // HsT1461	AY360137	115106	ENSG00000152240	9.44	8.75	No
GSHG0008480	SUCLA2	down	1.62	0.0385	chr13(-):48516792-48612125	UCSC	succinate-CoA ligase, ADP-forming, beta subunit	---	AK316271	8803	ENSG00000136143	7.88	7.19	No
GSHG0004586	OR56B1 // TRIM22	down	1.62	0.025	chr11(+):5687321-5821759	UCSC	olfactory receptor, family 56, subfamily B, member 1 // tripartite motif containing 22	OR56B1P // GPSTAF50 // RNF94 // STAF50	AK308796	10346 // 387748	ENSG00000132274 // ENSG00000181023	9.16	8.47	No
GSHG0029621	SNHG6	down	1.62	0.0256	chr8(-):67834165-67837777	UCSC	small nucleolar RNA host gene 6 (non-protein coding)	HBII-276HG // NCRNA00058 // U87HG	AY264285	641638	ENSG00000245910	7.43	6.74	No
GSHG0026075	VTA1	down	1.62	0.0139	chr6(+):142468396-142542083	UCSC	Vps20-associated 1 homolog (S. cerevisiae)	C6orf55 // HSPC228 // My012	AF271994	51534	ENSG00000009844	9.39	8.69	No
GSHG0015664	ZNF708	down	1.61	0.046	chr19(-):21473963-21512227	UCSC	zinc finger protein 708	ZNF15 // ZNF15L1 // KOX8	AK131527	7562	ENSG00000182141	9.03	8.35	Yes
GSHG0013246	EVI2B	down	1.61	0.00374	chr17(-):29630791-29641102	UCSC	ecotropic viral integration site 2B	CD361 // D17S376 // EVDB	BC005926	2124	ENSG00000185862	11.49	10.8	No
GSHG0012648	NME1 // NME1-NME2 // NME2	down	1.61	0.0143	chr17(+):49230920-49249104	UCSC	non-metastatic cells 1, protein (NM23A) expressed in // NME1-NME2 readthrough // non-metastatic cells 2, protein (NM23B) expressed in	NM23 // NM23-H1 // NM23-H2 // NM23-LV // NMELV	DQ109675	4830 // 4831 // 654364	ENSG00000011052 // ENSG00000239672 // ENSG00000243678	9.23	8.54	No
GSHG0001739	LZIC	down	1.61	0.0238	chr1(-):9990047-10003427	UCSC	leucine zipper and CTNNBIP1 domain containing	MGC15436	AB060688	84328	ENSG00000162441	8.13	7.44	No
GSHG0009383	DLGAP5	down	1.61	0.0391	chr14(-):55614839-55658396	UCSC	discs, large (Drosophila) homolog-associated protein 5	DLG7 // DLG1 // HURP // KIAA0008	AB076695	9787	ENSG00000126787	9.52	8.84	No
GSHG0008477	ESD	down	1.61	0.0412	chr13(-):47345391-47371367	UCSC	esterase D	---	AF112219	2098	ENSG00000139684	9.53	8.84	No
GSHG0007719	CCDC53	down	1.61	0.0397	chr12(-):102406720-102455847	UCSC	coiled-coil domain containing 53	CGI-116	AF151874	51019	ENSG00000120860	8.53	7.85	No
GSHG0006961	C12orf75	down	1.61	0.0043	chr12(+):105724411-105765296	UCSC	chromosome 12 open reading frame 75	OCC-1	BC013920	387882	ENSG00000235162	11.41	10.73	No
GSHG0004149	ASCC1	down	1.61	0.038	chr10(-):73856279-73980083	UCSC	activating signal cointegrator 1 complex subunit 1	ASC1p50 // CGI-18 // Em:AC022392.3	AY013290	51008	ENSG00000138303	7.32	6.64	No
GSHG0031799	STAG2	down	1.61	0.0174	chrX(+):123094529-123236349	UCSC	stromal antigen 2	SA-2 // SCC3B	CR627425	10735	ENSG00000101972	9.55	8.87	No
GSHG0030066	DNAJA1	down	1.61	0.0351	chr9(+):33025273-33039243	UCSC	DnaJ (Hsp40) homolog, subfamily A, member 1	HSJ2 // dj-2 // hdj-2 // HSPF4 // NEDD7	AK289623	3301	ENSG00000086061	9.25	8.56	No
GSHG0029985	---	down	1.61	0.0427	chr9(+):2042994-2046019	UCSC	---	---	AK055212	---	---	7.72	7.03	No
GSHG0023334	SDAD1	down	1.61	0.0258	chr4(-):76871059-76912098	UCSC	SDA1 domain containing 1	FLJ10498	CR749574	55153	ENSG00000198301	8.62	7.93	No
GSHG0022695	COPS4	down	1.61	0.0401	chr4(+):83955600-83996970	UCSC	COP9 constitutive photomorphogenic homolog subunit 4 (Arabidopsis)	CSN4	AK094238	51138	ENSG00000138663	7.67	6.98	Yes
GSHG0021629	---	down	1.61	0.00512	chr3(-):41262338-41266542	UCSC	---	---	AK311005	---	---	6.75	6.06	Yes
GSHG0002824	---	down	1.61	0.0247	chr1(-):197473881-197476148	UCSC	---	---	AK093982	---	---	8.81	8.12	No
GSHG0018746	---	down	1.61	0.0131	chr20(+):37652513-37653130	UCSC	---	---	AF086439	---	---	7.26	6.57	No
GSHG0002503	VPS72	down	1.61	0.0491	chr1(-):151148934-151167797	UCSC	vacuolar protein sorting 72 homolog (S. cerevisiae)	TCFL1 // Swc2 // YL-1 // YL1	AK225130	6944	ENSG00000163159	8.62	7.93	No
GSHG0013148	COPS3	down	1.6	0.000796	chr17(-):17150141-17184591	UCSC	COP9 constitutive photomorphogenic homolog subunit 3 (Arabidopsis)	CSN3 // SGN3	AF098109	8533	ENSG00000141030	10.03	9.35	No
GSHG0011688	DCUN1D3 // ERI2	down	1.6	0.0253	chr16(-):20791516-20911671	UCSC	DCN1, defective in cullin neddylation 1, domain containing 3 (S. cerevisiae) // ERI1 exoribonuclease family member 2	EXOD1 // DKFZp686O0290 // FLJ41725 // KIAA1504 // MGC16943 // MGC48972	BX648185	112479 // 123879	ENSG00000188215 // ENSG00000196678	7.8	7.13	No
GSHG0008896	HIF1A	down	1.6	0.00694	chr14(+):62162231-62214977	UCSC	hypoxia inducible factor 1, alpha subunit (basic helix-loop-helix transcription factor)	bHLHe78 // HIF-1alpha // HIF1 // MOP1 // PASD8	BX648795	3091	ENSG00000100644	9.87	9.19	No
GSHG0007286	GPR19	down	1.6	0.0278	chr12(-):12813825-12837455	UCSC	G protein-coupled receptor 19	---	AK074729	2842	ENSG00000183150	7.56	6.88	No
GSHG0006564	FAR2	down	1.6	0.0135	chr12(+):29302133-29487134	UCSC	fatty acyl CoA reductase 2	MLSTD1 // FLJ10462 // SDR10E2	AL136843	55711	ENSG00000064763	9.36	8.69	No
GSHG0004772	HSD17B12	down	1.6	0.0327	chr11(+):43702258-43878160	UCSC	hydroxysteroid (17-beta) dehydrogenase 12	KAR // SDR12C1	AK075011	51144	ENSG00000149084	8.64	7.97	No
GSHG0004162	ANXA7	down	1.6	0.00938	chr10(-):75135204-75173836	UCSC	annexin A7	ANX7	AK295319	310	ENSG00000138279	7.7	7.02	No
GSHG0003499	C10orf57	down	1.6	0.00245	chr10(+):81838198-81852306	UCSC	chromosome 10 open reading frame 57	bA369J21.6 // FLJ13263	BC022252	80195	ENSG00000133678	9.35	8.66	No
GSHG0022763	CISD2	down	1.6	0.0364	chr4(+):103790197-103810398	UCSC	CDGSH iron sulfur domain 2	WFS2 // ZCD2 // ERIS // Miner1	BX537971	493856	ENSG00000145354	8.85	8.17	No
GSHG0019965	YWHAH	down	1.6	0.0373	chr22(+):32340509-32353590	UCSC	tyrosine 3-monooxygenase/tryptophan 5-monooxygenase activation protein, eta polypeptide	YWHA1	BC003047	7533	ENSG00000128245	9.94	9.27	Yes
GSHG0014270	---	down	1.59	0.0014	chr18(-):37642867-37646437	UCSC	---	---	AK128175	---	---	5.98	5.31	No
GSHG0011866	MT1G	down	1.59	0.00332	chr16(-):56700650-56701977	UCSC	metallothionein 1G	MT1 // MT1K	BC005311	4495	ENSG00000125144	10	9.33	No
GSHG0011661	FOPNL	down	1.59	0.0238	chr16(-):15959577-15982470	UCSC	FGFR1OP N-terminal like	C16orf63 // DKFZp686N1651 // FLJ31153 // FOR20 // PHSECRG2	AL832498	123811	ENSG00000133393	8.6	7.93	No
GSHG0009960	PIAS1	down	1.59	0.00588	chr15(+):68346569-68480402	UCSC	protein inhibitor of activated STAT, 1	DDXBP1 // GBP // GU/RH-II // ZMIZ3	AF167160	8554	ENSG00000033800	11.13	10.46	No
GSHG0009393	EXOC5	down	1.59	0.0342	chr14(-):57673523-57735622	UCSC	exocyst complex component 5	SEC10L1 // SEC10 // SEC10P	BC031298	10640	ENSG00000070367	8.31	7.64	Yes
GSHG0001308	NEK7	down	1.59	0.0453	chr1(+):198126128-198288769	UCSC	NIMA (never in mitosis gene a)-related kinase 7	---	AK313411	140609	ENSG00000151414	9.24	8.57	Yes
GSHG0008040	RFC3	down	1.59	0.0423	chr13(+):34392265-34411632	UCSC	replication factor C (activator 1) 3, 38kDa	MGC5276 // RFC38	BC000149	5983	ENSG00000133119	9.23	8.56	No
GSHG0006554	STK38L	down	1.59	0.00412	chr12(+):27397078-27478888	UCSC	serine/threonine kinase 38 like	KIAA0965 // NDR2	AB023182	23012	ENSG00000211455	8.66	7.99	No
GSHG0029817	DSCC1	down	1.59	0.0431	chr8(-):120846206-120868149	UCSC	defective in sister chromatid cohesion 1 homolog (S. cerevisiae)	DCC1 // hDCC1 // MGC5528	BC001316	79075	ENSG00000136982	8.3	7.63	No
GSHG0029753	YWHAZ	down	1.59	0.0233	chr8(-):101922984-101965569	UCSC	tyrosine 3-monooxygenase/tryptophan 5-monooxygenase activation protein, zeta polypeptide	YWHAD // 14-3-3-zeta // KCIP-1	DQ894884	7534	ENSG00000164924	11.96	11.29	No
GSHG0003458	ADK	down	1.59	0.0188	chr10(+):75936444-76468781	UCSC	adenosine kinase	AK	U50196	132	ENSG00000156110	8.67	8	No
GSHG0027742	---	down	1.59	0.0162	chr7(+):133168851-133169833	UCSC	---	---	AK129981	---	---	7.43	6.76	No
GSHG0027180	AHR	down	1.59	0.0436	chr7(+):17338276-17385754	UCSC	aryl hydrocarbon receptor	bHLHe76	BC070080	196	ENSG00000106546	8.47	7.8	No
GSHG0025499	HIST1H4E	down	1.59	0.00886	chr6(+):26204780-26206266	UCSC	histone cluster 1, H4e	H4FJ // H4/j	BC012587	8367	ENSG00000198518	10.82	10.15	No
GSHG0003178	ATP5C1	down	1.59	0.0271	chr10(+):7830119-7849778	UCSC	ATP synthase, H+ transporting, mitochondrial F1 complex, gamma polypeptide 1	ATP5C // ATP5CL1	D16563	509	ENSG00000165629	10.35	9.69	No
GSHG0018179	NFE2L2	down	1.59	0.0222	chr2(-):178095039-178257427	UCSC	nuclear factor (erythroid-derived 2)-like 2	NRF2	BX647407	4780	ENSG00000116044	9.37	8.7	No
GSHG0011949	EXOSC6	down	1.58	0.0454	chr16(-):70282699-70900733	UCSC	exosome component 6	EAP4 // hMtr3p // MTR3 // Mtr3p // p11	AK095542	118460	ENSG00000223496	9.83	9.17	Yes
GSHG0007629	ZFC3H1	down	1.58	0.0466	chr12(-):72003384-72057638	UCSC	zinc finger, C3H1-type containing	CCDC131 // PSRC2 // KIAA0546 // MGC23401	BX647709	196441	ENSG00000133858	8.73	8.07	No
GSHG0004739	HIPK3	down	1.58	0.000579	chr11(+):33278218-33375851	UCSC	homeodomain interacting protein kinase 3	DYRK6 // FIST3 // PKY // YAK1	AK315277	10114	ENSG00000110422	9	8.34	No
GSHG0004373	BBIP1	down	1.58	0.0161	chr10(-):112658489-112679033	UCSC	BBSome interacting protein 1	NCRNA00081 // bA348N5.3 // BBIP10	BC073157	92482	ENSG00000214413	7.66	6.99	No
GSHG0032188	---	down	1.58	0.0106	chrX(-):74960373-74961903	UCSC	---	---	AK304575	---	---	9.58	8.91	Yes
GSHG0003564	EXOC6	down	1.58	0.0396	chr10(+):94586588-94819250	UCSC	exocyst complex component 6	SEC15L1 // DKFZp761I2124 // EXOC6A // FLJ1125 // MGC33397 // SEC15L // Sec15p	AK128190	54536	ENSG00000138190	8.11	7.45	No
GSHG0026894	ECHDC1	down	1.58	0.0268	chr6(-):127609859-127664716	UCSC	enoyl CoA hydratase domain containing 1	dJ351K20.2	AL834469	55862	ENSG00000093144	8.7	8.03	No
GSHG0026828	CD164	down	1.58	0.0476	chr6(-):109687715-109703672	UCSC	CD164 molecule, sialomucin	MGC-24 // MUC-24	D14043	8763	ENSG00000135535	10.62	9.96	No
GSHG0023449	BDH2	down	1.58	0.00876	chr4(-):103999254-104021017	UCSC	3-hydroxybutyrate dehydrogenase, type 2	DHRS6 // FLJ13261 // PRO20933 // SDR15C1 // UCPA-OR // UNQ6308	BC095414	56898	ENSG00000164039	8.63	7.97	No
GSHG0023164	LCORL	down	1.58	0.00834	chr4(-):17844844-18023380	UCSC	ligand dependent nuclear receptor corepressor-like	FLJ30696 // MLR1	BC037322	254251	ENSG00000178177	7.78	7.12	No
GSHG0021955	---	down	1.58	0.0377	chr3(-):114339157-114341717	UCSC	---	---	AK123099	---	---	7.14	6.48	Yes
GSHG0002965	---	down	1.58	0.0213	chr1(-):219395599-219398839	UCSC	---	---	BC038730	---	---	6.64	5.98	Yes
GSHG0021323	---	down	1.58	0.0473	chr3(+):171889805-171891421	UCSC	---	---	AK022461	---	---	5.95	5.29	No
GSHG0020637	RAB5A	down	1.58	0.0324	chr3(+):19988756-20026658	UCSC	RAB5A, member RAS oncogene family	RAB5	AF464088	5868	ENSG00000144566	10.06	9.4	No
GSHG0019939	UQCR10	down	1.58	0.0109	chr22(+):30163350-30165935	UCSC	ubiquinol-cytochrome c reductase, complex III subunit X	HSPC051 // QCR9 // UCCR7.2 // UCRC	AF161536	29796	ENSG00000184076	10.48	9.82	No
GSHG0002728	METTL18	down	1.58	0.0075	chr1(-):169761670-169764037	UCSC	methyltransferase like 18	C1orf156 // AsTP2 // HPM1 // MGC9084	AL035369	92342	ENSG00000171806	7.32	6.66	No
GSHG0009752	C15orf41	down	1.57	0.00198	chr15(+):36872045-37102432	UCSC	chromosome 15 open reading frame 41	FLJ22851 // HH114 // MGC11326	BC006254	84529	ENSG00000186073	8.48	7.83	No
GSHG0009303	BAZ1A	down	1.57	0.0336	chr14(-):35221939-35344853	UCSC	bromodomain adjacent to zinc finger domain, 1A	ACF1 // hACF1 // WALp1 // WCRF180	AB032252	11177	ENSG00000198604	9.52	8.87	No
GSHG0008396	---	down	1.57	0.0396	chr13(-):30770623-30771014	UCSC	---	---	EF212287	---	---	6.54	5.88	No
GSHG0007106	ZNF664	down	1.57	0.0446	chr12(+):124457670-124499973	UCSC	zinc finger protein 664	ZNF176 // DKFZp761B128 // ZFOC1	AL834266	144348	ENSG00000179195	8.52	7.87	No
GSHG0005633	TSG101	down	1.57	0.0222	chr11(-):18501860-18548472	UCSC	tumor susceptibility gene 101	TSG10 // VPS23	AK130787	7251	ENSG00000074319	8.82	8.16	No
GSHG0032195	TAF9B	down	1.57	0.0401	chrX(-):77385246-77395339	UCSC	TAF9B RNA polymerase II, TATA box binding protein (TBP)-associated factor, 31kDa	TAF9L // DN-7 // DN7 // TAFII31L // TFIID-31	BC009566	51616	ENSG00000187325	10.48	9.83	No
GSHG0031137	ZBTB6	down	1.57	0.0384	chr9(-):125670336-125675609	UCSC	zinc finger and BTB domain containing 6	ZNF482 // ZID	BC037282	10773	ENSG00000186130	8.39	7.74	No
GSHG0017057	WDR75	down	1.57	0.0171	chr2(+):190306159-190340287	UCSC	WD repeat domain 75	FLJ12519 // NET16 // UTP17	BC040567	84128	ENSG00000115368	9.42	8.76	No
GSHG0016068	ZNF614	down	1.57	0.0137	chr19(-):52516025-52531664	UCSC	zinc finger protein 614	FLJ21941	BC004930	80110	ENSG00000142556	7.65	7.01	No
GSHG0015534	ZNF490	down	1.56	0.0328	chr19(-):12660826-12721617	UCSC	zinc finger protein 490	KIAA1198	AB033024	57474	ENSG00000188033	7.84	7.2	No
GSHG0011002	CCP110	down	1.56	0.0352	chr16(+):19535208-19564726	UCSC	centriolar coiled coil protein 110kDa	CP110 // KIAA0419	BC036654	9738	ENSG00000103540	8.75	8.11	No
GSHG0008256	TM9SF2	down	1.56	0.0337	chr13(+):100153671-100215645	UCSC	transmembrane 9 superfamily member 2	P76	BC110656	9375	ENSG00000125304	11.28	10.64	No
GSHG0007391	TWF1	down	1.56	0.0195	chr12(-):44187528-44200181	UCSC	twinfilin, actin-binding protein, homolog 1 (Drosophila)	PTK9 // A6	BC043148	5756	ENSG00000151239	8.06	7.42	No
GSHG0007175	DCP1B	down	1.56	0.0196	chr12(-):2050757-2114209	UCSC	DCP1 decapping enzyme homolog B (S. cerevisiae)	FLJ31638	AK299203	196513	ENSG00000151065	8.55	7.91	No
GSHG0006982	ISCU	down	1.56	0.00128	chr12(+):108955239-108963158	UCSC	iron-sulfur cluster scaffold homolog (E. coli)	NIFUN // hnifU // IscU // ISU2	AK057251	23479	ENSG00000136003	9.45	8.82	No
GSHG0006558	MRPS35	down	1.56	0.0189	chr12(+):27863729-27909229	UCSC	mitochondrial ribosomal protein S35	MDS023 // MRPS28	AF182422	60488	ENSG00000061794	6.81	6.17	No
GSHG0004344	PCGF6	down	1.56	0.00926	chr10(-):105062554-105110907	UCSC	polycomb group ring finger 6	RNF134 // MBLR	BC010235	84108	ENSG00000156374	8.27	7.63	No
GSHG0003982	KIF5B	down	1.56	0.0335	chr10(-):32300071-32345337	UCSC	kinesin family member 5B	KNS1 // KNS	X65873	3799	ENSG00000170759	10.57	9.92	No
GSHG0027296	EPDR1	down	1.56	4.44e-05	chr7(+):37960163-37991534	UCSC	ependymin related protein 1 (zebrafish)	EPDR // MERP-1 // MERP1 // UCC1	AY027862	54749	ENSG00000086289	7.85	7.21	No
GSHG0003218	RPP38	down	1.56	0.0081	chr10(+):15139202-15146255	UCSC	ribonuclease P/MRP 38kDa subunit	---	AK223418	10557	ENSG00000152464	8.2	7.56	No
GSHG0023861	SUB1	down	1.56	0.0072	chr5(+):32585663-32604185	UCSC	SUB1 homolog (S. cerevisiae)	p14 // p15 // PC4	BC071655	10923	ENSG00000113387	10.27	9.62	No
GSHG0019972	FBXO7	down	1.56	0.0454	chr22(+):32870710-32894818	UCSC	F-box protein 7	Fbx // FBX7 // PARK15	BC008361	25793	ENSG00000100225	10.33	9.7	No
GSHG0019486	WRB	down	1.56	0.00468	chr21(+):40752252-40786214	UCSC	tryptophan rich basic protein	CHD5	AK293866	7485	ENSG00000182093	8.66	8.01	No
GSHG0016535	SNRNP27	down	1.56	0.0205	chr2(+):70121090-70132348	UCSC	small nuclear ribonucleoprotein 27kDa (U4/U6.U5)	RY1	BC017890	11017	ENSG00000124380	9.38	8.74	No
GSHG0015483	---	down	1.55	0.0384	chr19(-):9800600-9811452	UCSC	---	---	AK296815	---	---	7.68	7.05	Yes
GSHG0013839	DCXR	down	1.55	0.0351	chr17(-):79993758-79995579	UCSC	dicarbonyl/L-xylulose reductase	DCR // KIDCR // SDR20C1	AK226040	51181	ENSG00000169738	9.95	9.31	No
GSHG0012763	AMZ2	down	1.55	0.00682	chr17(+):66243715-66253297	UCSC	archaelysin family metallopeptidase 2	---	AK126146	51321	ENSG00000196704	8.5	7.87	No
GSHG0010524	C15orf44	down	1.55	0.0207	chr15(-):65871120-65903580	UCSC	chromosome 15 open reading frame 44	DKFZP564O1664	AK027475	81556	ENSG00000138614	9.9	9.27	No
GSHG0009873	TMOD3	down	1.55	0.0463	chr15(+):52121828-52221651	UCSC	tropomodulin 3 (ubiquitous)	UTMOD	BX647277	29766	ENSG00000138594	8.68	8.05	No
GSHG0009310	MBIP	down	1.55	0.016	chr14(-):36767771-36789883	UCSC	MAP3K12 binding inhibitory protein 1	---	AB038523	51562	ENSG00000151332	8.62	8	No
GSHG0008861	MUDENG	down	1.55	0.0385	chr14(+):57735627-57756794	UCSC	MU-2/AP1M2 domain containing, death-inducing	C14orf108 // FLJ10813 // MuD	AL136685	55745	ENSG00000053770	9.19	8.56	No
GSHG0008491	KPNA3	down	1.55	0.00784	chr13(-):50273462-50367057	UCSC	karyopherin alpha 3 (importin alpha 4)	hSRP1 // IPOA4 // SRP1gamma // SRP4	BC035090	3839	ENSG00000102753	9.09	8.46	No
GSHG0007716	ARL1	down	1.55	0.0389	chr12(-):101786923-101801570	UCSC	ADP-ribosylation factor-like 1	ARFL1	BX537387	400	ENSG00000120805	9.34	8.71	No
GSHG0006105	MTMR2	down	1.55	0.0259	chr11(-):95566046-95657459	UCSC	myotubularin related protein 2	CMT4B // KIAA1073	AB028996	8898	ENSG00000087053	8.25	7.61	No
GSHG0005385	FAM118B	down	1.55	0.000337	chr11(+):126081667-126132540	UCSC	family with sequence similarity 118, member B	FLJ21103	AK225081	79607	ENSG00000197798	8.8	8.16	No
GSHG0004436	UROS	down	1.55	0.00564	chr10(-):127477148-127511796	UCSC	uroporphyrinogen III synthase	---	BC002573	7390	ENSG00000188690	9.12	8.49	No
GSHG0000775	GNAI3	down	1.55	0.0309	chr1(+):110091233-110136975	UCSC	guanine nucleotide binding protein (G protein), alpha inhibiting activity polypeptide 3	87U6	M27543	2773	ENSG00000065135	7.98	7.35	No
GSHG0004226	GLUD1	down	1.55	0.0181	chr10(-):88810247-88854656	UCSC	glutamate dehydrogenase 1	GLUD // GDH	M20867	2746	ENSG00000148672	9.83	9.2	Yes
GSHG0003721	SLC18A2	down	1.55	0.0224	chr10(+):119000600-119038941	UCSC	solute carrier family 18 (vesicular monoamine), member 2	VMAT2 // SVAT // SVMT	BC030593	6571	ENSG00000165646	8.83	8.19	No
GSHG0032242	TCEAL8	down	1.55	0.00146	chrX(-):102507924-102510114	UCSC	transcription elongation factor A (SII)-like 8	MGC45400	AL833632	90843	ENSG00000180964	7.31	6.68	No
GSHG0003562	KIF11	down	1.55	0.0296	chr10(+):94352904-94415150	UCSC	kinesin family member 11	KNSL1 // Eg5 // HKSP // TRIP5	BC050421	3832	ENSG00000138160	9.16	8.52	No
GSHG0030369	HSDL2	down	1.55	0.00904	chr9(+):115142217-115234684	UCSC	hydroxysteroid dehydrogenase like 2	C9orf99 // SDR13C1	AY093428	84263	ENSG00000119471	7.43	6.8	No
GSHG0029464	TNFRSF10B	down	1.55	0.0358	chr8(-):22877651-22926554	UCSC	tumor necrosis factor receptor superfamily, member 10b	CD262 // DR5 // KILLER // TRAIL-R2 // TRICK2A // TRICKB	BX538104	8795	ENSG00000120889	7.17	6.54	No
GSHG0027163	---	down	1.55	0.0073	chr7(+):7841311-7918849	UCSC	---	---	AK027125	---	---	9.35	8.72	No
GSHG0026762	SNHG5	down	1.55	0.00984	chr6(-):86386798-86388438	UCSC	small nucleolar RNA host gene 5 (non-protein coding)	C6orf160 // bA33E24.2 // LINC00044 // MGC16362 // NCRNA00044 // U50HG	BC108291	387066	ENSG00000203875	8.65	8.02	Yes
GSHG0024420	UBLCP1	down	1.55	0.0496	chr5(+):158690278-158713040	UCSC	ubiquitin-like domain containing CTD phosphatase 1	CPUB1 // MGC10067	AY444562	134510	ENSG00000164332	8.03	7.39	No
GSHG0021997	PTPLB	down	1.55	0.0488	chr3(-):123210397-123304036	UCSC	protein tyrosine phosphatase-like (proline instead of catalytic arginine), member b	---	BC049369	201562	ENSG00000206527	8.51	7.89	No
GSHG0021182	NCK1	down	1.55	0.0499	chr3(+):136581073-136667967	UCSC	NCK adaptor protein 1	NCK // NCKalpha	BC006403	4690	ENSG00000158092	9.2	8.57	Yes
GSHG0019190	C20orf111	down	1.55	0.0406	chr20(-):42825136-42839450	UCSC	chromosome 20 open reading frame 111	dJ1183I21.1 // HSPC207 // Perit1	AL133000	51526	ENSG00000132823	6.75	6.12	No
GSHG0017734	DUSP11	down	1.55	0.0197	chr2(-):73989326-74007248	UCSC	dual specificity phosphatase 11 (RNA/RNP complex 1-interacting)	PIR1	AF023917	8446	ENSG00000144048	9.54	8.91	Yes
GSHG0017044	DNAJC10	down	1.55	0.0111	chr2(+):183580997-183644331	UCSC	DnaJ (Hsp40) homolog, subfamily C, member 10	ERdj5 // PDIA19	AL832632	54431	ENSG00000077232	8.21	7.58	No
GSHG0016993	PDK1	down	1.55	0.0464	chr2(+):173420100-173489823	UCSC	pyruvate dehydrogenase kinase, isozyme 1	---	AK302321	5163	ENSG00000152256	9.16	8.53	No
GSHG0016521	PNO1	down	1.55	0.00872	chr2(+):68385005-68403089	UCSC	partner of NOB1 homolog (S. cerevisiae)	KHRBP1 // RRP20	BC008304	56902	ENSG00000115946	7.04	6.41	No
GSHG0002309	VAV3	down	1.55	0.0137	chr1(-):108113790-108507631	UCSC	vav 3 guanine nucleotide exchange factor	---	AF067817	10451	ENSG00000134215	8.74	8.11	No
GSHG0015656	ZNF506	down	1.54	0.044	chr19(-):19896651-19932560	UCSC	zinc finger protein 506	DKFZp761G1812	AL136548	440515	ENSG00000081665	8.61	7.99	No
GSHG0002210	CTBS	down	1.54	0.046	chr1(-):85018806-85040163	UCSC	chitobiase, di-N-acetyl-	CTB	BC096752	1486	ENSG00000117151	7.83	7.2	No
GSHG0013934	PSMG2	down	1.54	0.0153	chr18(+):12658738-12725739	UCSC	proteasome (prosome, macropain) assembly chaperone 2	TNFSF5IP1 // CLAST3 // HCCA3 // HsT1707 // MDS003 // MGC15092 // PAC2	AF068295	56984	ENSG00000128789	10.51	9.89	No
GSHG0012685	RAD51C	down	1.54	0.0158	chr17(+):56769930-56811690	UCSC	RAD51 homolog C (S. cerevisiae)	RAD51L2	BC107753	5889	ENSG00000108384	9.1	8.48	No
GSHG0012179	C17orf49 // RNASEK	down	1.54	0.00632	chr17(+):6915953-6920844	UCSC	chromosome 17 open reading frame 49 // ribonuclease, RNase K	MGC49942 // MGC71993	BC040148	124944 // 440400	ENSG00000161939 // ENSG00000219200	10.71	10.09	No
GSHG0011219	MT1IP	down	1.54	0.0161	chr16(+):56710044-56711676	UCSC	metallothionein 1I, pseudogene	MT1 // MT1I // MTE	BC171791	644314	---	7.84	7.22	No
GSHG0010677	BTBD1	down	1.54	0.0011	chr15(-):83685183-83736006	UCSC	BTB (POZ) domain containing 1	---	AL136853	53339	ENSG00000064726	7.95	7.33	No
GSHG0010437	RSL24D1	down	1.54	0.0281	chr15(-):55473513-55489231	UCSC	ribosomal L24 domain containing 1	C15orf15 // HRP-L30-iso // L30 // RPL24 // RPL24L	AF212226	51187	ENSG00000137876	8.88	8.26	No
GSHG0010404	GABPB1	down	1.54	0.00322	chr15(-):50569455-50647399	UCSC	GA binding protein transcription factor, beta subunit 1	GABPB2 // E4TF1-47 // GABPB	BC036080	2553	ENSG00000104064	9.32	8.69	No
GSHG0009341	DNAAF2	down	1.54	0.0289	chr14(-):50091892-50101867	UCSC	dynein, axonemal, assembly factor 2	C14orf104 // FLJ10563 // KTU	FJ158843	55172	ENSG00000165506	7.07	6.45	No
GSHG0008555	FBXL3	down	1.54	0.0245	chr13(-):77579390-77601299	UCSC	F-box and leucine-rich repeat protein 3	FBXL3A // FBL3 // FBL3A	BC072448	26224	ENSG00000005812	8.71	8.09	No
GSHG0007359	FAM60A	down	1.54	0.00832	chr12(-):31433529-31479121	UCSC	family with sequence similarity 60, member A	C12orf14 // TERA	AF212220	58516	ENSG00000139146	9.26	8.63	No
GSHG0006941	CHPT1	down	1.54	0.0451	chr12(+):102091424-102123424	UCSC	choline phosphotransferase 1	CPT1	AK226127	56994	ENSG00000111666	8.01	7.39	Yes
GSHG0005920	YIF1A	down	1.54	0.0335	chr11(-):66052052-66056616	UCSC	Yip1 interacting factor homolog A (S. cerevisiae)	YIF1 // 54TM // FinGER7 // YIF1P	AK291124	10897	ENSG00000174851	8.38	7.76	No
GSHG0004717	METTL15	down	1.54	0.0162	chr11(+):28129916-28354943	UCSC	methyltransferase like 15	METT5D1 // FLJ33979	BC066900	196074	ENSG00000169519	8.44	7.82	No
GSHG0031636	COX7B	down	1.54	0.0383	chrX(+):77154971-77160881	UCSC	cytochrome c oxidase subunit VIIb	---	Z14244	1349	ENSG00000131174	8.11	7.49	No
GSHG0003567	CEP55	down	1.54	0.0495	chr10(+):95256389-95325718	UCSC	centrosomal protein 55kDa	C10orf3 // CT111 // FLJ10540	HQ447335	55165	ENSG00000138180	8.92	8.3	No
GSHG0030684	TTC39B	down	1.54	0.0176	chr9(-):15170843-15307358	UCSC	tetratricopeptide repeat domain 39B	C9orf52 // FLJ33868	BC142985	158219	ENSG00000155158	7.16	6.54	No
GSHG0003358	---	down	1.54	0.0267	chr10(+):51371378-51734610	UCSC	---	---	AK098044	---	---	10.25	9.63	Yes
GSHG0026824	SNX3	down	1.54	0.0145	chr6(-):108532430-108582456	UCSC	sorting nexin 3	Grd19	AK289476	8724	ENSG00000112335	9.15	8.53	No
GSHG0026779	LYRM2	down	1.54	0.0193	chr6(-):90277863-90348472	UCSC	LYR motif containing 2	DJ122O8.2	AK311275	57226	ENSG00000083099	8.61	7.99	No
GSHG0024988	PJA2	down	1.54	0.0314	chr5(-):108670411-108745609	UCSC	praja ring finger 2	RNF131 // KIAA0438 // Neurodap1	AB007898	9867	ENSG00000198961	9	8.37	No
GSHG0023898	FBXO4	down	1.54	0.0103	chr5(+):41925356-41941670	UCSC	F-box protein 4	FBX4	AK024075	26272	ENSG00000151876	7.41	6.79	No
GSHG0023597	ANXA2P1	down	1.54	0.0123	chr4(-):154228621-154229963	UCSC	annexin A2 pseudogene 1	ANX2L1 // ANX2P1 // LPC2A	M62896	303	ENSG00000213406	7.19	6.57	No
GSHG0022511	RBPJ	down	1.54	0.0167	chr4(+):26321332-26432806	UCSC	recombination signal binding protein for immunoglobulin kappa J region	IGKJRB1 // RBPSUH // CBF1 // IGKJRB // KBF2 // RBP-J // RBPJK // SUH	BC020780	3516	ENSG00000168214	8.99	8.37	No
GSHG0015760	ZNF566	down	1.54	0.0444	chr19(-):36937940-36980764	UCSC	zinc finger protein 566	FLJ14779 // MGC12515	BX649070	84924	ENSG00000186017	7.39	6.76	No
GSHG0015694	---	down	1.54	0.029	chr19(-):28221181-28237138	UCSC	---	---	AK094188	---	---	5.99	5.36	Yes
GSHG0015669	ZNF100	down	1.53	0.0499	chr19(-):21905567-21950379	UCSC	zinc finger protein 100	---	BC035579	163227	ENSG00000197020	8.74	8.13	No
GSHG0014328	NARS	down	1.53	0.0195	chr18(-):55267888-55289040	UCSC	asparaginyl-tRNA synthetase	NARS1	BC001687	4677	ENSG00000134440	9.1	8.48	No
GSHG0014185	PPP4R1	down	1.53	0.0159	chr18(-):9546793-9614575	UCSC	protein phosphatase 4, regulatory subunit 1	PP4R1	AF111106	9989	ENSG00000154845	9.29	8.68	No
GSHG0013907	ANKRD12	down	1.53	0.0168	chr18(+):9136781-9283757	UCSC	ankyrin repeat domain 12	FLJ20053 // GAC-1 // KIAA0874	AY373757	23253	ENSG00000101745	9.39	8.77	No
GSHG0011717	---	down	1.53	0.0057	chr16(-):23947916-23948406	UCSC	---	---	AF085827	---	---	6.79	6.17	Yes
GSHG0008867	PSMA3	down	1.53	0.00446	chr14(+):58711574-58738727	UCSC	proteasome (prosome, macropain) subunit, alpha type, 3	HC8	BC005265	5684	ENSG00000100567	8.39	7.78	Yes
GSHG0008603	GPR18	down	1.53	0.00744	chr13(-):99906972-99913998	UCSC	G protein-coupled receptor 18	---	BC066927	2841	ENSG00000125245	7.14	6.53	No
GSHG0008353	SACS	down	1.53	0.0328	chr13(-):23902972-23949682	UCSC	spastic ataxia of Charlevoix-Saguenay (sacsin)	ARSACS // DKFZp686B15167 // DNAJC29 // KIAA0730	BX640926	26278	ENSG00000151835	8.44	7.82	No
GSHG0005142	---	down	1.53	0.0072	chr11(+):78244222-78269592	UCSC	---	---	BC042472	---	---	7.05	6.44	No
GSHG0003656	AS3MT // C10orf32	down	1.53	0.0128	chr10(+):104613979-104661653	UCSC	arsenic (+3 oxidation state) methyltransferase // chromosome 10 open reading frame 32	CYT19 // FLJ40752	BC040069	119032 // 57412	ENSG00000166275 // ENSG00000214435	7.91	7.29	No
GSHG0032152	PDZD11	down	1.53	0.013	chrX(-):69506416-69509768	UCSC	PDZ domain containing 11	PDZK11	AK311539	51248	ENSG00000120509	8.64	8.02	No
GSHG0031401	SYAP1	down	1.53	0.0312	chrX(+):16737721-16779557	UCSC	synapse associated protein 1	FLJ14495 // PRO3113	CR749849	94056	ENSG00000169895	6.93	6.32	No
GSHG0030920	GOLM1 // ISCA1	down	1.53	0.0108	chr9(-):88641062-88897676	UCSC	golgi membrane protein 1 // iron-sulfur cluster assembly 1 homolog (S. cerevisiae)	C9orf155 // GOLPH2 // HBLD2 // bA379P1.3 // FLJ23608 // GP73 // hIscA // ISA1 // MGC4276	AK309289	51280 // 81689	ENSG00000135052 // ENSG00000135070	9.39	8.78	No
GSHG0029640	TRAM1	down	1.53	0.0121	chr8(-):71485673-71520622	UCSC	translocation associated membrane protein 1	TRAM // TRAMP	BC037738	23471	ENSG00000067167	10	9.38	No
GSHG0024782	MOCS2	down	1.53	0.0235	chr5(-):52393887-52405603	UCSC	molybdenum cofactor synthesis 2	MOCO1	BC095417	4338	ENSG00000164172	7.51	6.9	No
GSHG0022772	AIMP1	down	1.53	0.0465	chr4(+):107236771-107269648	UCSC	aminoacyl tRNA synthetase complex-interacting multifunctional protein 1	SCYE1 // EMAP-2 // EMAPII // p43	AK095951	9255	ENSG00000164022	7.75	7.14	No
GSHG0002521	S100A11	down	1.53	0.0178	chr1(-):152004982-152009511	UCSC	S100 calcium binding protein A11	S100C	D38583	6282	ENSG00000163191	9.75	9.13	No
GSHG0017609	MCFD2	down	1.53	0.045	chr2(-):47129017-47168878	UCSC	multiple coagulation factor deficiency 2	F5F8D // LMAN1IP // SDNSF	AK293889	90411	ENSG00000180398	7.74	7.13	No
GSHG0033345	---	down	1.53	0.00816	chr19(-):43406240-43422043	UCSC	---	---	BC020652	---	---	6.9	6.29	No
GSHG0001980	MEAF6	down	1.52	0.0053	chr1(-):37958176-37980381	UCSC	MYST/Esa1-associated factor 6	C1orf149 // CENP-28 // Eaf6 // FLJ11730 // NY-SAR-91	BX640719	64769	ENSG00000163875	10.16	9.55	No
GSHG0010031	UBE2Q2	down	1.52	0.0432	chr15(+):76135648-76193380	UCSC	ubiquitin-conjugating enzyme E2Q family member 2	DKFZp762C143	AK000617	92912	ENSG00000140367	8.32	7.72	Yes
GSHG0008007	RPL21	down	1.52	0.0294	chr13(+):27825691-27830705	UCSC	ribosomal protein L21	DKFZp686C06101 // FLJ27458 // L21 // MGC104274 // MGC104275 // MGC71252	BC104667	6144	ENSG00000122026	9.79	9.19	No
GSHG0006654	LARP4	down	1.52	0.0269	chr12(+):50794648-50873788	UCSC	La ribonucleoprotein domain family, member 4	PP13296	AL832198	113251	ENSG00000161813	8.62	8.02	No
GSHG0003851	---	down	1.52	0.00774	chr10(-):7200572-7203727	UCSC	---	---	AK057130	---	---	8.98	8.37	No
GSHG0003843	GDI2	down	1.52	0.033	chr10(-):5807185-5855397	UCSC	GDP dissociation inhibitor 2	RABGDIB	Y13286	2665	ENSG00000057608	10.35	9.74	No
GSHG0031112	PSMD5	down	1.52	0.0339	chr9(-):123578334-123605229	UCSC	proteasome (prosome, macropain) 26S subunit, non-ATPase, 5	KIAA0072 // S5B	BC014478	5711	ENSG00000095261	8.26	7.65	No
GSHG0030772	SIGMAR1	down	1.52	0.0423	chr9(-):34634717-34637806	UCSC	sigma non-opioid intracellular receptor 1	OPRS1 // SR-BP1	AK130502	10280	ENSG00000147955	9.17	8.56	No
GSHG0030652	C9orf46	down	1.52	0.00404	chr9(-):5357969-5630076	UCSC	chromosome 9 open reading frame 46	AD025 // FLJ14688 // MDS030	BC036853	55848	ENSG00000107020	6.71	6.11	No
GSHG0000508	BTF3L4	down	1.52	0.0494	chr1(+):52521967-52556445	UCSC	basic transcription factor 3-like 4	MGC23908	AK027750	91408	ENSG00000134717	10.16	9.56	Yes
GSHG0029594	---	down	1.52	0.00416	chr8(-):57872365-57874470	UCSC	---	---	AX746720	---	---	7.82	7.22	No
GSHG0027636	PRKAR2B	down	1.52	0.0174	chr7(+):106685139-106802255	UCSC	protein kinase, cAMP-dependent, regulatory, type II, beta	PRKAR2	BC075800	5577	ENSG00000005249	8.39	7.78	No
GSHG0026837	SLC22A16	down	1.52	0.0295	chr6(-):110745904-110797844	UCSC	solute carrier family 22 (organic cation/carnitine transporter), member 16	CT2 // FLIPT2 // OCT6 // OKB1	BC047565	85413	ENSG00000004809	7.27	6.66	No
GSHG0026402	HIST1H3J	down	1.52	0.0432	chr6(-):27858158-27858570	UCSC	histone cluster 1, H3j	H3FJ // H3/j	AB463735	8356	ENSG00000197153	10.78	10.17	Yes
GSHG0025908	MANEA	down	1.52	0.0275	chr6(+):96025411-96057328	UCSC	mannosidase, endo-alpha	FLJ12838 // mandaselin	BX640869	79694	ENSG00000172469	8.6	7.99	No
GSHG0024110	RFESD	down	1.52	0.0369	chr5(+):94982558-94992837	UCSC	Rieske (Fe-S) domain containing	---	BC035110	317671	ENSG00000175449	6.9	6.3	No
GSHG0015353	ZNF77	down	1.51	0.0151	chr19(-):2933217-2944931	UCSC	zinc finger protein 77	pT1	BC062561	58492	ENSG00000175691	7.01	6.42	No
GSHG0011637	RSL1D1	down	1.51	0.00678	chr16(-):11931210-11950887	UCSC	ribosomal L1 domain containing 1	CSIG // DKFZP564M182 // L12 // PBK1 // UTP30	HQ258426	26156	ENSG00000171490	10.11	9.52	No
GSHG0011357	ZFP1	down	1.51	0.00776	chr16(+):75182390-75206131	UCSC	zinc finger protein 1 homolog (mouse)	FLJ34243 // ZNF475	BC064604	162239	ENSG00000184517	8.39	7.8	No
GSHG0010323	C15orf57 // MRPL42P5	down	1.51	0.0264	chr15(-):40823540-40857241	UCSC	chromosome 15 open reading frame 57 // mitochondrial ribosomal protein L42 pseudogene 5	CCDC32 // MGC20481	AK098781	359821 // 90416	ENSG00000128891	8.29	7.7	No
GSHG0007399	SLC38A1	down	1.51	0.0442	chr12(-):46581584-46662826	UCSC	solute carrier family 38, member 1	ATA1 // NAT2 // SAT1	AK225778	81539	ENSG00000111371	9.95	9.36	No
GSHG0006103	FAM76B	down	1.51	0.0166	chr11(-):95502117-95522954	UCSC	family with sequence similarity 76, member B	MGC33371	BC026013	143684	ENSG00000077458	8.78	8.19	No
GSHG0005667	KIF18A	down	1.51	0.0268	chr11(-):28042166-28129726	UCSC	kinesin family member 18A	DKFZP434G2226	AY791349	81930	ENSG00000121621	8.67	8.07	No
GSHG0005161	C11orf73	down	1.51	0.0204	chr11(+):86013269-86056984	UCSC	chromosome 11 open reading frame 73	HSPC138 // HSPC179	BC021621	51501	ENSG00000149196	8.9	8.31	No
GSHG0004938	RARRES3	down	1.51	0.0496	chr11(+):63304280-63313929	UCSC	retinoic acid receptor responder (tazarotene induced) 3	HRASLS4 // TIG3	AF092922	5920	ENSG00000133321	8.5	7.91	No
GSHG0032363	ARHGEF6	down	1.51	0.026	chrX(-):135747708-135863503	UCSC	Rac/Cdc42 guanine nucleotide exchange factor (GEF) 6	MRX46 // alpha-PIX // alphaPIX // Cool-2 // Cool2 // KIAA0006	BC039856	9459	ENSG00000129675	9.51	8.91	No
GSHG0033758	---	down	1.51	0.0408	chrX(-):74588262-74591027	UCSC	---	---	AK123754	---	---	6.8	6.21	No
GSHG0031789	ZBTB33	down	1.51	0.0154	chrX(+):119384607-119392251	UCSC	zinc finger and BTB domain containing 33	kaiso // WUGSC:H_DJ525N14.1 // ZNF-kaiso // ZNF348	BC042753	10009	ENSG00000177485	9.81	9.22	No
GSHG0031076	C9orf80	down	1.51	0.00232	chr9(-):115448793-115480390	UCSC	chromosome 9 open reading frame 80	HSPC043	AK000637	58493	ENSG00000148153	8.86	8.27	No
GSHG0003555	RPP30	down	1.51	0.00994	chr10(+):92631274-92665818	UCSC	ribonuclease P/MRP 30kDa subunit	TSG15	AK225532	10556	ENSG00000148688	9.03	8.44	No
GSHG0030758	PTENP1	down	1.51	0.0305	chr9(-):33673509-33676902	UCSC	phosphatase and tensin homolog pseudogene 1	psiPTEN // PTEN-rs // PTEN2 // PTH2	BC038293	11191	ENSG00000237984	10.77	10.18	Yes
GSHG0030249	CKS2	down	1.51	0.049	chr9(+):91926113-91931617	UCSC	CDC28 protein kinase regulatory subunit 2	---	X54942	1164	ENSG00000123975	9.74	9.15	No
GSHG0029177	---	down	1.51	0.0216	chr8(+):103391872-103392610	UCSC	---	---	BC047082	---	---	5.6	5	No
GSHG0003271	RAB18	down	1.51	0.0274	chr10(+):27793213-27829097	UCSC	RAB18, member RAS oncogene family	---	BC029350	22931	ENSG00000099246	7.66	7.07	Yes
GSHG0003221	PTER	down	1.51	0.0125	chr10(+):16478942-16555450	UCSC	phosphotriesterase related	---	BX648556	9317	ENSG00000165983	9.22	8.62	No
GSHG0022648	DCK	down	1.51	0.037	chr4(+):71859280-71896627	UCSC	deoxycytidine kinase	---	BC103764	1633	ENSG00000156136	9.66	9.06	Yes
GSHG0020167	BID	down	1.51	0.0288	chr22(-):18216906-18257431	UCSC	BH3 interacting domain death agonist	---	BC009197	637	ENSG00000015475	9.04	8.45	No
GSHG0019198	TOMM34	down	1.51	0.0117	chr20(-):43570772-43589066	UCSC	translocase of outer mitochondrial membrane 34	HTOM34P // TOM34	BC007423	10953	ENSG00000025772	8.68	8.09	No
GSHG0018312	IDH1	down	1.51	0.021	chr2(-):209100954-209119838	UCSC	isocitrate dehydrogenase 1 (NADP+), soluble	---	AF020038	3417	ENSG00000138413	9.11	8.52	No
GSHG0016188	CHMP2A	down	1.51	0.0163	chr19(-):59062934-59066459	UCSC	charged multivesicular body protein 2A	BC-2 // CHMP2 // VPS2 // VPS2A	AF042384	27243	ENSG00000130724	10.15	9.56	No
GSHG0016075	---	down	1.51	0.0392	chr19(-):52892095-52901018	UCSC	---	---	AK097590	---	---	6.8	6.2	Yes
GSHG0013935	SEH1L	down	1.5	0.00923	chr18(+):12948010-12987535	UCSC	SEH1-like (S. cerevisiae)	SEC13L // Seh1 // SEH1A // SEH1B	AF136976	81929	ENSG00000085415	9.05	8.47	No
GSHG0013724	SUMO2	down	1.5	0.0285	chr17(-):73163408-73179080	UCSC	SMT3 suppressor of mif two 3 homolog 2 (S. cerevisiae)	SMT3H2 // SMT3B	BC008450	6613	ENSG00000188612	11.91	11.32	No
GSHG0012374	ATAD5	down	1.5	0.0432	chr17(+):29158986-29222295	UCSC	ATPase family, AAA domain containing 5	C17orf41 // ELG1 // FLJ12735 // FRAG1	AY557611	79915	ENSG00000176208	8.94	8.36	No
GSHG0012237	MAP2K4	down	1.5	0.00656	chr17(+):11924135-12047147	UCSC	mitogen-activated protein kinase kinase 4	SERK1 // JNKK1 // MEK4 // MKK4 // PRKMK4	BC060764	6416	ENSG00000065559	8.06	7.48	No
GSHG0011821	VPS35	down	1.5	0.00446	chr16(-):46693589-46723094	UCSC	vacuolar protein sorting 35 homolog (S. cerevisiae)	FLJ10752 // MEM3	AF186382	55737	ENSG00000069329	9.07	8.48	No
GSHG0011019	UQCRC2	down	1.5	0.00394	chr16(+):21963981-21994673	UCSC	ubiquinol-cytochrome c reductase core protein II	QCR2 // UQCR2	AK094006	7385	ENSG00000140740	10.49	9.91	No
GSHG0010311	---	down	1.5	0.0413	chr15(-):39163988-39166036	UCSC	---	---	AK090546	---	---	6.57	5.98	Yes
GSHG0009647	C14orf2	down	1.5	0.0024	chr14(-):104378626-104387866	UCSC	chromosome 14 open reading frame 2	MP68	AF054175	9556	ENSG00000156411	8.96	8.37	No
GSHG0009399	TIMM9	down	1.5	0.0427	chr14(-):58875212-58894232	UCSC	translocase of inner mitochondrial membrane 9 homolog (yeast)	TIM9A	BC020213	26520	ENSG00000100575	7.18	6.6	No
GSHG0009336	NEMF	down	1.5	0.0135	chr14(-):50250529-50319513	UCSC	nuclear export mediator factor	SDCCAG1 // FLJ10051 // NY-CO-1	AK304695	9147	ENSG00000165525	8.63	8.04	No
GSHG0008856	RPL13AP3	down	1.5	0.0156	chr14(+):56232963-56234434	UCSC	ribosomal protein L13a pseudogene 3	---	BC067891	645683	ENSG00000177350	9.39	8.8	Yes
GSHG0008854	KTN1	down	1.5	0.049	chr14(+):56046925-56151301	UCSC	kinectin 1 (kinesin receptor)	CG1 // KIAA0004	D13629	3895	ENSG00000126777	7.32	6.74	No
GSHG0008829	TMX1	down	1.5	0.0113	chr14(+):51706894-51722766	UCSC	thioredoxin-related transmembrane protein 1	TXNDC // TXNDC1 // PDIA11 // TMX	BC036460	81542	ENSG00000139921	10.23	9.65	No
GSHG0008560	RNF219	down	1.5	0.0255	chr13(-):79188424-79234701	UCSC	ring finger protein 219	C13orf7 // FLJ13449	AK098640	79596	ENSG00000152193	7.85	7.26	No
GSHG0008340	---	down	1.5	0.045	chr13(-):21276269-21277786	UCSC	---	---	AK090664	---	---	6.54	5.96	No
GSHG0008177	UCHL3	down	1.5	0.012	chr13(+):76123896-76180035	UCSC	ubiquitin carboxyl-terminal esterase L3 (ubiquitin thiolesterase)	---	M30496	7347	ENSG00000118939	8.77	8.19	No
GSHG0001240	---	down	1.5	0.0398	chr1(+):180857290-180859387	UCSC	---	---	AB075495	---	---	6.57	5.99	No
GSHG0007669	GALNT4 // POC1B	down	1.5	0.0261	chr12(-):89813500-89920039	UCSC	UDP-N-acetyl-alpha-D-galactosamine:polypeptide N-acetylgalactosaminyltransferase 4 (GalNAc-T4) // POC1 centriolar protein homolog B (Chlamydomonas)	WDR51B // FLJ14923 // GalNAc-T4 // TUWD12	AK074772	282809 // 8693	ENSG00000139323 // ENSG00000257594	8.25	7.66	No
GSHG0006831	YEATS4	down	1.5	0.0491	chr12(+):69753532-69784575	UCSC	YEATS domain containing 4	GAS41 // NuBI-1 // YAF9	U61384	8089	ENSG00000127337	8.39	7.81	No
GSHG0004384	ABLIM1	down	1.5	0.0253	chr10(-):116190870-116528019	UCSC	actin binding LIM protein 1	ABLIM // LIMAB1 // abLIM // limatin	D31883	3983	ENSG00000099204	9.33	8.74	No
GSHG0004279	TM9SF3	down	1.5	0.0175	chr10(-):98280432-98346809	UCSC	transmembrane 9 superfamily member 3	SMBP	AF269150	56889	ENSG00000077147	9.87	9.28	No
GSHG0029726	TP53INP1	down	1.5	0.0112	chr8(-):95938201-95961594	UCSC	tumor protein p53 inducible nuclear protein 1	DKFZp434M1317 // FLJ22139 // P53DINP1 // SIP // Teap // TP53INP1A // TP53INP1B	AK125880	94241	ENSG00000164938	8.43	7.85	No
GSHG0026370	HIST1H1C	down	1.5	0.0448	chr6(-):26055812-26056663	UCSC	histone cluster 1, H1c	H1F2 // H1.2	AB590706	3006	ENSG00000187837	10.17	9.59	No
GSHG0025514	HMGN4	down	1.5	0.025	chr6(+):26538623-26547160	UCSC	high mobility group nucleosomal binding domain 4	HMG17L3 // NHC	BC001282	10473	ENSG00000182952	9.66	9.07	No
GSHG0024593	MED10	down	1.5	0.0437	chr5(-):6372276-6378639	UCSC	mediator complex subunit 10	L6 // MGC5309 // NUT2 // TRG20	BC003353	84246	ENSG00000133398	8.28	7.7	No
GSHG0022869	ELMOD2	down	1.5	0.0103	chr4(+):141445318-141474930	UCSC	ELMO/CED-12 domain containing 2	MGC10084	BX648349	255520	ENSG00000179387	7.03	6.44	No
GSHG0022529	PGM2	down	1.5	0.0158	chr4(+):37828325-37864558	UCSC	phosphoglucomutase 2	FLJ10983	AF109360	55276	ENSG00000169299	9.46	8.87	No
GSHG0014667	TPM4	down	1.49	0.0098	chr19(+):16178348-16213813	UCSC	tropomyosin 4	---	AK023385	7171	ENSG00000167460	10.34	9.77	No
GSHG0014656	CYP4F22	down	1.49	0.0397	chr19(+):15619336-15663127	UCSC	cytochrome P450, family 4, subfamily F, polypeptide 22	FLJ39501	AK096820	126410	ENSG00000171954	7.69	7.11	Yes
GSHG0014213	---	down	1.49	0.0452	chr18(-):18533529-18691813	UCSC	---	---	BC113114	---	---	8.8	8.23	Yes
GSHG0013004	UBE2G1	down	1.49	0.0346	chr17(-):4174128-4269868	UCSC	ubiquitin-conjugating enzyme E2G 1	UBE2G // UBC7	BC026288	7326	ENSG00000132388	10.06	9.48	No
GSHG0012168	MIS12	down	1.49	0.041	chr17(+):5389716-5394134	UCSC	MIS12, MIND kinetochore complex component, homolog (S. pombe)	hMIS12 // KNTC2AP // MGC2488 // MTW1	AK056072	79003	ENSG00000167842	8.61	8.03	No
GSHG0009627	WARS	down	1.49	0.013	chr14(-):100800125-100843142	UCSC	tryptophanyl-tRNA synthetase	IFI53 // IFP53	BX248006	7453	ENSG00000140105	8.65	8.07	No
GSHG0009052	CALM1	down	1.49	0.0127	chr14(+):90863372-90874395	UCSC	calmodulin 1 (phosphorylase kinase, delta)	CALML2 // CAMI // DD132 // PHKD	BC047523	801	ENSG00000198668	11.15	10.57	No
GSHG0008657	PCID2	down	1.49	0.0357	chr13(-):113831891-113863001	UCSC	PCI domain containing 2	FLJ11305	AK001185	55795	ENSG00000126226	9.67	9.09	No
GSHG0007780	PPP1CC	down	1.49	0.0469	chr12(-):111157615-111180676	UCSC	protein phosphatase 1, catalytic subunit, gamma isozyme	PP1gamma	X74008	5501	ENSG00000186298	10.56	9.98	No
GSHG0007425	CCNT1	down	1.49	0.0139	chr12(-):49080687-49110681	UCSC	cyclin T1	HIVE1 // CCNT // CYCT1	AF048730	904	ENSG00000129315	9.33	8.76	No
GSHG0033195	GAS2L3	down	1.49	0.0452	chr12(+):100967461-101018683	UCSC	growth arrest-specific 2 like 3	---	AK315189	283431	ENSG00000139354	6.42	5.84	No
GSHG0006931	---	down	1.49	0.0101	chr12(+):100735662-100737194	UCSC	---	---	AK021434	---	---	6.35	5.77	No
GSHG0006581	DNM1L	down	1.49	0.009	chr12(+):32832134-32898483	UCSC	dynamin 1-like	DRP1 // DVLP // DYMPLE // HDYNIV // VPS1	AB209070	10059	ENSG00000087470	8.31	7.73	No
GSHG0005610	COPB1 // PSMA1	down	1.49	0.0075	chr11(-):14479053-14665163	UCSC	coatomer protein complex, subunit beta 1 // proteasome (prosome, macropain) subunit, alpha type, 1	COPB // HC2 // MGC14542 // MGC14575 // MGC14751 // MGC1667 // MGC21459 // MGC22853 // MGC23915 // NU // PROS30	M64992	1315 // 5682	ENSG00000129083 // ENSG00000129084	10.14	9.56	No
GSHG0004311	BLOC1S2	down	1.49	0.0423	chr10(-):102033713-102046437	UCSC	biogenesis of lysosomal organelles complex-1, subunit 2	BLOS2 // FLJ30135 // MGC10120	AK054697	282991	ENSG00000196072	7.15	6.57	No
GSHG0004300	GOT1	down	1.49	0.0392	chr10(-):101156628-101190417	UCSC	glutamic-oxaloacetic transaminase 1, soluble (aspartate aminotransferase 1)	---	M37400	2805	ENSG00000120053	9.21	8.64	No
GSHG0030245	SPIN1	down	1.49	0.032	chr9(+):91002840-91093607	UCSC	spindlin 1	SPIN	AL136719	10927	ENSG00000106723	11	10.43	No
GSHG0029757	ZNF706	down	1.49	0.0142	chr8(-):102209284-102217844	UCSC	zinc finger protein 706	HSPC038	BC068524	51123	ENSG00000120963	7.89	7.31	No
GSHG0027707	ATP6V1F	down	1.49	0.0365	chr7(+):128502906-128505902	UCSC	ATPase, H+ transporting, lysosomal 14kDa, V1 subunit F	ATP6S14 // VATF // Vma7	D49400	9296	ENSG00000128524	10.4	9.83	No
GSHG0027200	KLHL7	down	1.49	0.029	chr7(+):23145353-23215036	UCSC	kelch-like 7 (Drosophila)	KLHL6 // RP42 // SBBI26	BC039585	55975	ENSG00000122550	7.53	6.96	No
GSHG0024946	MBLAC2	down	1.49	0.0496	chr5(-):89754027-89770585	UCSC	metallo-beta-lactamase domain containing 2	DKFZp686P15118 // MGC46734	AK128603	153364	ENSG00000176055	6.72	6.14	No
GSHG0024044	IQGAP2	down	1.49	0.0312	chr5(+):75699080-76003955	UCSC	IQ motif containing GTPase activating protein 2	---	U51903	10788	ENSG00000145703	9.79	9.21	No
GSHG0023441	SLC39A8	down	1.49	0.0149	chr4(-):103174554-103266631	UCSC	solute carrier family 39 (zinc transporter), member 8	BIGM103	AK304274	64116	ENSG00000138821	10.65	10.07	No
GSHG0003158	FAM208B	down	1.49	0.0295	chr10(+):5726800-5805701	UCSC	family with sequence similarity 208, member B	C10orf18 // bA318E3.2 // FLJ20360 // KIAA2006	CR936780	54906	ENSG00000108021	8.4	7.82	No
GSHG0022064	MRPL3	down	1.49	0.0223	chr3(-):131181056-131221829	UCSC	mitochondrial ribosomal protein L3	RPML3 // MRL3	X06323	11222	ENSG00000114686	9.11	8.54	No
GSHG0017307	---	down	1.49	0.0272	chr2(+):236636209-236639121	UCSC	---	---	AK055821	---	---	6.82	6.24	Yes
GSHG0014262	SLC39A6	down	1.48	0.00412	chr18(-):33688495-33709348	UCSC	solute carrier family 39 (zinc transporter), member 6	LIV-1	AK301539	25800	ENSG00000141424	8.34	7.77	No
GSHG0002057	PRDX1	down	1.48	0.00804	chr1(-):45976724-45987562	UCSC	peroxiredoxin 1	PAGA // NKEFA	BC021683	5052	ENSG00000117450	10.39	9.83	No
GSHG0011655	RRN3	down	1.48	0.0372	chr16(-):15153879-15188168	UCSC	RRN3 RNA polymerase I transcription factor homolog (S. cerevisiae)	DKFZp566E104	AK225662	54700	ENSG00000085721	8.88	8.32	No
GSHG0011378	CENPN	down	1.48	0.00868	chr16(+):81040103-81066700	UCSC	centromere protein N	C16orf60 // BM039 // FLJ13607 // FLJ22660	AK026313	55839	ENSG00000166451	9.74	9.17	No
GSHG0011359	GABARAPL2	down	1.48	0.0214	chr16(+):75600249-75611778	UCSC	GABA(A) receptor-associated protein-like 2	ATG8 // ATG8C // GATE-16 // GATE16 // GEF2	AB030710	11345	ENSG00000034713	9.18	8.62	No
GSHG0010428	ARPP19	down	1.48	0.0352	chr15(-):52839243-52861365	UCSC	cAMP-regulated phosphoprotein, 19kDa	ARPP-16 // ARPP-19 // ARPP16 // ENSAL	AL833077	10776	ENSG00000128989	8.61	8.05	No
GSHG0008511	VPS36	down	1.48	0.0378	chr13(-):52986742-53024763	UCSC	vacuolar protein sorting 36 homolog (S. cerevisiae)	C13orf9 // CGI-145 // Eap45	BX647847	51028	ENSG00000136100	8.54	7.97	No
GSHG0007301	WBP11	down	1.48	0.0138	chr12(-):14939411-14956439	UCSC	WW domain binding protein 11	NPWBP // SIPP1	BC001621	51729	ENSG00000084463	9.35	8.78	No
GSHG0005808	MRPL16	down	1.48	0.0075	chr11(-):59573608-59578345	UCSC	mitochondrial ribosomal protein L16	FLJ20484 // PNAS-111	AF183428	54948	ENSG00000166902	8.22	7.66	No
GSHG0000817	CAPZA1	down	1.48	0.0396	chr1(+):113161783-113214241	UCSC	capping protein (actin filament) muscle Z-line, alpha 1	---	BX648738	829	ENSG00000116489	10.47	9.9	No
GSHG0032146	EDA2R	down	1.48	0.0043	chrX(-):65815484-65858892	UCSC	ectodysplasin A2 receptor	EDA-A2R // EDAA2R // TNFRSF27 // XEDAR	AK299018	60401	ENSG00000131080	7.43	6.87	No
GSHG0031715	TMSB15B	down	1.48	0.00108	chrX(+):103173479-103229569	UCSC	thymosin beta 15B	MGC39900	BC019900	286527	ENSG00000158427	9.04	8.48	Yes
GSHG0031477	KDM6A	down	1.48	0.0321	chrX(+):44732429-44971851	UCSC	lysine (K)-specific demethylase 6A	UTX	AF000993	7403	ENSG00000147050	8.27	7.7	No
GSHG0033147	STAMBPL1	down	1.48	0.0358	chr10(+):90639623-90734910	UCSC	STAM binding protein-like 1	ALMalpha // AMSH-FP // AMSH-LP // bA399O19.2 // FLJ31524 // KIAA1373	AB037794	57559	ENSG00000138134	9.16	8.59	Yes
GSHG0024768	PAIP1	down	1.48	0.0142	chr5(-):43526367-43566362	UCSC	poly(A) binding protein interacting protein 1	---	DQ891110	10605	ENSG00000172239	8.69	8.12	No
GSHG0019847	SNAP29	down	1.48	0.0241	chr22(+):21213325-21243776	UCSC	synaptosomal-associated protein, 29kDa	CEDNIK // SNAP-29	CR456582	9342	ENSG00000099940	9.52	8.95	No
GSHG0018541	PRNP	down	1.48	0.00238	chr20(+):4666994-4682235	UCSC	prion protein	CJD // GSS // PRIP // CD230 // PRP	BC022532	5621	ENSG00000171867	8.93	8.36	No
GSHG0014747	ZNF430	down	1.47	0.0173	chr19(+):21203426-21241653	UCSC	zinc finger protein 430	FLJ13659	AY269787	80264	ENSG00000118620	8.76	8.2	Yes
GSHG0014077	MALT1	down	1.47	0.0273	chr18(+):56338618-56416448	UCSC	mucosa associated lymphoid tissue lymphoma translocation gene 1	MLT	AF316597	10892	ENSG00000172175	7.33	6.78	No
GSHG0013045	GABARAP	down	1.47	0.0327	chr17(-):7143740-7145757	UCSC	GABA(A) receptor-associated protein	ATG8A // MM46	AK098634	11337	ENSG00000170296	11.69	11.14	No
GSHG0001926	PEF1	down	1.47	0.0174	chr1(-):32095468-32110490	UCSC	penta-EF-hand domain containing 1	PEF1A	AK001420	553115	ENSG00000162517	8.33	7.78	No
GSHG0011897	NAE1	down	1.47	0.04	chr16(-):66836773-66864879	UCSC	NEDD8 activating enzyme E1 subunit 1	APPBP1 // ula-1	U50939	8883	ENSG00000159593	8.74	8.18	No
GSHG0010717	AP3S2 // C15orf38	down	1.47	0.0372	chr15(-):90369624-90456159	UCSC	adaptor-related protein complex 3, sigma 2 subunit // chromosome 15 open reading frame 38	MGC61550 // sigma3b	AK000495	10239 // 348110	ENSG00000157823 // ENSG00000242498	8.94	8.39	No
GSHG0001532	ARV1	down	1.47	0.0309	chr1(+):231114788-231136471	UCSC	ARV1 homolog (S. cerevisiae)	---	AF290878	64801	ENSG00000173409	8.32	7.76	No
GSHG0009095	C14orf129	down	1.47	0.014	chr14(+):96829863-96853623	UCSC	chromosome 14 open reading frame 129	---	AK000796	51527	ENSG00000100744	7.34	6.78	No
GSHG0005993	C11orf51	down	1.47	0.0216	chr11(-):71817424-71823826	UCSC	chromosome 11 open reading frame 51	DKFZP564M082 // HSPC020	AK311146	25906	ENSG00000110200	9.54	8.98	No
GSHG0003999	CUL2	down	1.47	0.0496	chr10(-):35298808-35379570	UCSC	cullin 2	---	AK095217	8453	ENSG00000108094	7.75	7.2	Yes
GSHG0032456	ZFY	down	1.47	0.0255	chrY(+):2803112-2849187	UCSC	zinc finger protein, Y-linked	ZNF911	BC114960	7544	ENSG00000067646	7.96	7.41	No
GSHG0032018	APOO	down	1.47	0.0151	chrX(-):23851481-23926037	UCSC	apolipoprotein O	FAM121B // MGC4825 // My025	BC010102	79135	ENSG00000184831	8.58	8.03	No
GSHG0032011	RPS6KA3	down	1.47	0.0241	chrX(-):20172496-20285523	UCSC	ribosomal protein S6 kinase, 90kDa, polypeptide 3	CLS // MRX19 // HU-3 // RSK // RSK2	AB208933	6197	ENSG00000177189	8.6	8.04	No
GSHG0030103	CREB3	down	1.47	0.0312	chr9(+):35731124-35737005	UCSC	cAMP responsive element binding protein 3	Luman // LZIP	AF029674	10488	ENSG00000107175	8.24	7.68	No
GSHG0029984	SMARCA2	down	1.47	0.0106	chr9(+):2015219-2193621	UCSC	SWI/SNF related, matrix associated, actin dependent regulator of chromatin, subfamily a, member 2	SNF2L2 // BAF190 // BRM // hBRM // hSNF2a // SNF2 // SNF2LA // Sth1p // SWI2	BC068252	6595	ENSG00000080503	7.91	7.36	No
GSHG0029683	IMPA1	down	1.47	0.0104	chr8(-):82570191-82598560	UCSC	inositol(myo)-1(or 4)-monophosphatase 1	IMPA	BC008381	3612	ENSG00000133731	7.88	7.33	No
GSHG0025344	SCGB3A1	down	1.47	0.0217	chr5(-):180017105-180018483	UCSC	secretoglobin, family 3A, member 1	HIN-1 // HIN1 // LU105 // PnSP-2 // UGRP2	AF086152	92304	ENSG00000161055	8.48	7.92	No
GSHG0024825	DIMT1	down	1.47	0.00766	chr5(-):61684352-61699756	UCSC	DIM1 dimethyladenosine transferase 1 homolog (S. cerevisiae)	DIMT1L // HSA9761	AK292723	27292	ENSG00000086189	7.89	7.33	No
GSHG0002755	---	down	1.47	0.0285	chr1(-):174964438-174968496	UCSC	---	---	BC038430	---	---	7.41	6.86	Yes
GSHG0019259	DPM1	down	1.47	0.0316	chr20(-):49551402-49575087	UCSC	dolichyl-phosphate mannosyltransferase polypeptide 1, catalytic subunit	CDGIE // MPDS	BC008466	8813	ENSG00000000419	9.14	8.58	No
GSHG0015479	---	down	1.46	0.0328	chr19(-):9642975-9643488	UCSC	---	---	AF086493	---	---	6.47	5.92	Yes
GSHG0000398	UTP11L	down	1.46	0.0257	chr1(+):38478388-38489588	UCSC	UTP11-like, U3 small nucleolar ribonucleoprotein, (yeast)	CGI-94	AK308377	51118	ENSG00000183520	7.77	7.23	No
GSHG0013613	SKA2	down	1.46	0.0226	chr17(-):57187316-57232561	UCSC	spindle and kinetochore associated complex subunit 2	FAM33A // FLJ12758	AK056473	348235	ENSG00000182628	9.9	9.35	No
GSHG0013308	DDX52	down	1.46	0.0312	chr17(-):35969792-36003475	UCSC	DEAD (Asp-Glu-Ala-Asp) box polypeptide 52	ROK1	BC041785	11056	ENSG00000141141	8.46	7.92	No
GSHG0011938	---	down	1.46	0.0466	chr16(-):69358502-69360926	UCSC	---	---	AK092372	---	---	6.99	6.45	No
GSHG0011914	AGRP	down	1.46	0.000256	chr16(-):67516474-67517716	UCSC	agouti related protein homolog (mouse)	Agrt // ART // ASIP2	U88063	181	ENSG00000159723	8.14	7.59	No
GSHG0010513	MTFMT	down	1.46	0.0289	chr15(-):65294845-65321977	UCSC	mitochondrial methionyl-tRNA formyltransferase	FMT1	BC033687	123263	ENSG00000103707	7.53	6.99	No
GSHG0010069	ZFAND6	down	1.46	0.0295	chr15(+):80351977-80430712	UCSC	zinc finger, AN1-type domain 6	ZA20D3 // AWP1 // ZFAND5B	AF061739	54469	ENSG00000086666	8.18	7.63	No
GSHG0008481	MED4	down	1.46	0.046	chr13(-):48650092-48669251	UCSC	mediator complex subunit 4	VDRIP // DRIP36 // HSPC126 // TRAP36	AK001934	29079	ENSG00000136146	7.47	6.93	No
GSHG0007701	CDK17	down	1.46	0.0099	chr12(-):96672335-96794274	UCSC	cyclin-dependent kinase 17	PCTK2 // PCTAIRE2	BC033005	5128	ENSG00000059758	9.22	8.67	No
GSHG0007224	SLC2A14	down	1.46	0.0179	chr12(-):7965109-8043744	UCSC	solute carrier family 2 (facilitated glucose transporter), member 14	SLC2A3P3 // GLUT14	AK316238	144195	ENSG00000173262	8.64	8.09	No
GSHG0007057	GATC	down	1.46	0.0276	chr12(+):120884247-120901542	UCSC	glutamyl-tRNA(Gln) amidotransferase, subunit C homolog (bacterial)	15E1.2 // FLJ37000 // gatC	BC034962	283459	ENSG00000111780	9.5	8.96	No
GSHG0006915	SNRPF	down	1.46	0.0313	chr12(+):96252737-96259973	UCSC	small nuclear ribonucleoprotein polypeptide F	Sm-F	X85372	6636	ENSG00000139343	7.62	7.08	No
GSHG0005165	TMEM135	down	1.46	0.0496	chr11(+):86748896-87034568	UCSC	transmembrane protein 135	FLJ22104	BX648678	65084	ENSG00000166575	7.54	6.99	Yes
GSHG0004678	---	down	1.46	0.0344	chr11(+):18283456-18285048	UCSC	---	---	AF512499	---	---	8.51	7.96	No
GSHG0004556	PGAP2	down	1.46	0.0368	chr11(+):3818954-3847600	UCSC	post-GPI attachment to proteins 2	CWH43-N // FRAG1	AL096753	27315	ENSG00000148985	9.48	8.93	No
GSHG0032982	VAMP7	down	1.46	0.0368	chrX(+):155110946-155173432	UCSC	vesicle-associated membrane protein 7	SYBL1 // TI-VAMP // VAMP-7	BC056141	6845	ENSG00000124333	9.47	8.93	No
GSHG0031575	---	down	1.46	0.0135	chrX(+):56755685-56845606	UCSC	---	---	BX537532	---	---	9.12	8.58	No
GSHG0031431	PDK3	down	1.46	0.0304	chrX(+):24483351-24557492	UCSC	pyruvate dehydrogenase kinase, isozyme 3	---	AK301965	5165	ENSG00000067992	8.61	8.06	No
GSHG0030695	PLIN2	down	1.46	0.0172	chr9(-):19115771-19127516	UCSC	perilipin 2	ADFP // ADRP	BC005127	123	ENSG00000147872	8.94	8.4	No
GSHG0030343	FKTN	down	1.46	0.043	chr9(+):108320408-108403398	UCSC	fukutin	FCMD // LGMD2M	AB008226	2218	ENSG00000106692	6.38	5.84	No
GSHG0003517	FAM190B	down	1.46	0.00186	chr10(+):86088419-86278275	UCSC	family with sequence similarity 190, member B	KIAA1128	AK298966	54462	ENSG00000107771	10.35	9.8	No
GSHG0030061	---	down	1.46	0.037	chr9(+):32465460-32466688	UCSC	---	---	BC030746	---	---	6.53	5.99	No
GSHG0029825	DERL1	down	1.46	0.016	chr8(-):124025588-124054542	UCSC	Der1-like domain family, member 1	DER-1 // DER1 // derlin-1 // FLJ13784 // MGC3067 // PRO2577	AY358818	79139	ENSG00000136986	9.18	8.63	No
GSHG0029491	PBK	down	1.46	0.0378	chr8(-):27667140-27695572	UCSC	PDZ binding kinase	CT84 // FLJ14385 // Nori-3 // SPK // TOPK	BC015191	55872	ENSG00000168078	7.51	6.96	No
GSHG0026389	HIST1H2BK	down	1.46	0.0249	chr6(-):27106073-27114619	UCSC	histone cluster 1, H2bk	H2BFT // H2BFAiii	BC000893	85236	ENSG00000197903	10.62	10.07	Yes
GSHG0026317	---	down	1.46	0.0097	chr6(-):13614345-13615387	UCSC	---	---	BC064478	---	---	7.97	7.42	Yes
GSHG0023372	PLAC8	down	1.46	0.0282	chr4(-):84011213-84035911	UCSC	placenta-specific 8	C15 // onzin	AK000140	51316	ENSG00000145287	8.56	8.02	No
GSHG0022891	ABCE1	down	1.46	0.0312	chr4(+):146019463-146050331	UCSC	ATP-binding cassette, sub-family E (OABP), member 1	RNASEL1 // RNASELI // RNS4I // OABP // RLI	X76388	6059	ENSG00000164163	9.36	8.81	No
GSHG0021653	KIAA1143	down	1.46	0.0475	chr3(-):44790238-44803156	UCSC	KIAA1143	---	BC008468	57456	ENSG00000163807	8.63	8.09	No
GSHG0018087	---	down	1.46	0.0297	chr2(-):159514849-159591516	UCSC	---	---	AK126351	---	---	6.18	5.63	Yes
GSHG0016394	MORN2	down	1.46	0.0153	chr2(+):39103103-39109789	UCSC	MORN repeat containing 2	MOPT	AY367766	729967	ENSG00000188010	6.09	5.54	No
GSHG0002386	SIKE1	down	1.46	0.00412	chr1(-):115312107-115323306	UCSC	suppressor of IKBKE 1	FLJ21168 // SIKE	CR936771	80143	ENSG00000052723	8.37	7.83	No
GSHG0015160	ZNF525 // ZNF765	down	1.45	0.0394	chr19(+):53868958-53930572	UCSC	zinc finger protein 525 // zinc finger protein 765	KIAA1979	AK293890	170958 // 91661	ENSG00000196417 // ENSG00000203326	6.91	6.38	Yes
GSHG0002189	CRYZ	down	1.45	0.0274	chr1(-):75171174-75198735	UCSC	crystallin, zeta (quinone reductase)	---	BC070058	1429	ENSG00000116791	8.53	8	No
GSHG0014761	ZNF492	down	1.45	0.0289	chr19(+):22817239-22850472	UCSC	zinc finger protein 492	ZNF115 // KIAA1473	AB040906	57615	ENSG00000229676	7.81	7.28	No
GSHG0033328	RAB8A	down	1.45	0.0111	chr19(+):16222467-16245040	UCSC	RAB8A, member RAS oncogene family	MEL // RAB8	AK025165	4218	ENSG00000167461	8.02	7.48	No
GSHG0002119	HSPB11	down	1.45	0.0178	chr1(-):54387234-54411288	UCSC	heat shock protein family B (small), member 11	C1orf41 // HSPCO34 // IFT25 // PP25	BC005245	51668	ENSG00000081870	7.64	7.1	No
GSHG0012756	KPNA2	down	1.45	0.0472	chr17(+):66031848-66042969	UCSC	karyopherin alpha 2 (RAG cohort 1, importin alpha 1)	RCH1 // IPOA1 // QIP2 // SRP1alpha	U28386	3838	ENSG00000182481	11.28	10.74	No
GSHG0011664	---	down	1.45	0.0388	chr16(-):17196183-17200389	UCSC	---	---	BX647541	---	---	8.43	7.9	Yes
GSHG0010295	ZNF770	down	1.45	0.0265	chr15(-):35270545-35280488	UCSC	zinc finger protein 770	FLJ20582 // PRO1914	BC071603	54989	ENSG00000198146	8.5	7.97	No
GSHG0008111	CDADC1	down	1.45	0.0492	chr13(+):49822062-49867622	UCSC	cytidine and dCMP deaminase domain containing 1	NYD-SP15	AY027525	81602	ENSG00000102543	9.19	8.65	No
GSHG0008105	RB1	down	1.45	0.0469	chr13(+):48877862-49056122	UCSC	retinoblastoma 1	OSRC // RB	L41870	5925	ENSG00000139687	10.05	9.51	No
GSHG0007467	SMAGP	down	1.45	0.00606	chr12(-):51638345-51664674	UCSC	small cell adhesion glycoprotein	hSMAGP // MGC149453 // MGC149454	BC045658	57228	ENSG00000170545	8.25	7.71	No
GSHG0006658	ATF1	down	1.45	0.0108	chr12(+):51157884-51214001	UCSC	activating transcription factor 1	TREB36	BC029619	466	ENSG00000123268	10.04	9.51	No
GSHG0006004	RAB6A	down	1.45	0.0416	chr11(-):73386939-73472178	UCSC	RAB6A, member RAS oncogene family	RAB6	BC068486	5870	ENSG00000175582	9.25	8.72	No
GSHG0004629	WEE1	down	1.45	0.0233	chr11(+):9595228-9611531	UCSC	WEE1 homolog (S. pombe)	---	BC051831	7465	ENSG00000166483	9.53	9	No
GSHG0004608	ZNF215	down	1.45	0.0488	chr11(+):6947592-7005863	UCSC	zinc finger protein 215	ZKSCAN11	BC014538	7762	ENSG00000149054	7.22	6.68	No
GSHG0004260	NOC3L	down	1.45	0.0298	chr10(-):96075004-96122715	UCSC	nucleolar complex associated 3 homolog (S. cerevisiae)	C10orf117 // AD24 // FAD24 // FLJ12820	AK302028	64318	ENSG00000173145	6.95	6.42	Yes
GSHG0003682	SHOC2	down	1.45	0.0296	chr10(+):112679360-112773424	UCSC	soc-2 suppressor of clear homolog (C. elegans)	KIAA0862 // SOC-2 // SOC2 // SUR-8 // SUR8	BC044752	8036	ENSG00000108061	8.97	8.43	No
GSHG0003660	TAF5	down	1.45	0.0293	chr10(+):105127710-105148815	UCSC	TAF5 RNA polymerase II, TATA box binding protein (TBP)-associated factor, 100kDa	TAF2D // TAFII100	BC052268	6877	ENSG00000148835	7.83	7.29	No
GSHG0003585	CCNJ	down	1.45	0.0183	chr10(+):97803148-97820623	UCSC	cyclin J	bA690P14.1 // FLJ10895	BC043175	54619	ENSG00000107443	9.32	8.79	No
GSHG0031466	ATP6AP2	down	1.45	0.0357	chrX(+):40440146-40465889	UCSC	ATPase, H+ transporting, lysosomal accessory protein 2	ATP6IP2 // APT6M8-9 // ATP6M8-9 // M8-9	AK075382	10159	ENSG00000182220	9.3	8.76	No
GSHG0026113	PCMT1	down	1.45	0.0403	chr6(+):150070848-150132556	UCSC	protein-L-isoaspartate (D-aspartate) O-methyltransferase	---	AK098739	5110	ENSG00000120265	9.62	9.08	Yes
GSHG0025272	BOD1	down	1.45	0.0156	chr5(-):173034525-173043656	UCSC	biorientation of chromosomes in cell division 1	FAM44B	BC007436	91272	ENSG00000145919	8.03	7.49	No
GSHG0023419	EIF4E	down	1.45	0.0329	chr4(-):99801019-99851795	UCSC	eukaryotic translation initiation factor 4E	EIF4EL1 // EIF4F // EIF4E1	BC035166	1977	ENSG00000151247	9.34	8.81	No
GSHG0023330	G3BP2	down	1.45	0.0209	chr4(-):76567971-76598597	UCSC	GTPase activating protein (SH3 domain) binding protein 2	KIAA0660	AB014560	9908	ENSG00000138757	9.51	8.98	No
GSHG0023145	FBXL5	down	1.45	0.0439	chr4(-):15552232-15657005	UCSC	F-box and leucine-rich repeat protein 5	FBL4 // FBL5 // FLR1	AM393475	26234	ENSG00000118564	10.06	9.52	Yes
GSHG0022537	KLHL5	down	1.45	0.0217	chr4(+):39046659-39123914	UCSC	kelch-like 5 (Drosophila)	---	BC053860	51088	ENSG00000109790	7.51	6.98	No
GSHG0033395	TP53RK	down	1.45	0.00238	chr20(-):45313005-45318284	UCSC	TP53 regulating kinase	C20orf64 // BUD32 // dJ101A2.2 // Nori-2p // prpk	AK096502	112858	ENSG00000172315	8.78	8.24	Yes
GSHG0015482	ZNF562	down	1.44	0.0376	chr19(-):9762955-9785776	UCSC	zinc finger protein 562	FLJ20079	AK303038	54811	ENSG00000171466	6.69	6.17	No
GSHG0012842	METTL23	down	1.44	0.0369	chr17(+):74722936-74729961	UCSC	methyltransferase like 23	C17orf95 // LOC124512	BC033998	124512	ENSG00000181038	8.39	7.87	No
GSHG0011963	PHLPP2	down	1.44	0.0296	chr16(-):71671739-71758605	UCSC	PH domain and leucine rich repeat protein phosphatase 2	PHLPPL // KIAA0931	BX647823	23035	ENSG00000040199	7.68	7.15	No
GSHG0011361	TERF2IP	down	1.44	0.0152	chr16(+):75681635-75691330	UCSC	telomeric repeat binding factor 2, interacting protein	RAP1	AK000669	54386	ENSG00000166848	8.45	7.92	No
GSHG0010227	NIPA2	down	1.44	0.0455	chr15(-):23005349-23034410	UCSC	non imprinted in Prader-Willi/Angelman syndrome 2	---	AK096305	81614	ENSG00000140157	8.83	8.3	Yes
GSHG0009970	RPLP1	down	1.44	0.00306	chr15(+):69745155-69747884	UCSC	ribosomal protein, large, P1	LP1	AK130958	6176	ENSG00000137818	11.59	11.06	No
GSHG0009777	C15orf23	down	1.44	0.00746	chr15(+):40674922-40686445	UCSC	chromosome 15 open reading frame 23	FLJ14502	AK125765	90417	ENSG00000128944	8.9	8.37	No
GSHG0006503	ATF7IP	down	1.44	0.00762	chr12(+):14518608-14651697	UCSC	activating transcription factor 7 interacting protein	FLJ10688 // p621	BC053625	55729	ENSG00000171681	11.29	10.77	No
GSHG0006000	FCHSD2	down	1.44	0.0306	chr11(-):72547812-72853091	UCSC	FCH and double SH3 domains 2	SH3MD3 // KIAA0769	AB018312	9873	ENSG00000137478	9.23	8.71	No
GSHG0005146	C11orf82	down	1.44	0.0476	chr11(+):82612740-82669319	UCSC	chromosome 11 open reading frame 82	FLJ25416 // FLJ38838	AK058145	220042	ENSG00000165490	7.79	7.27	No
GSHG0004098	CCDC6	down	1.44	0.0363	chr10(-):61548522-61666414	UCSC	coiled-coil domain containing 6	D10S170 // TST1 // H4 // PTC // TPC	BC036757	8030	ENSG00000108091	9.54	9.02	No
GSHG0032362	MAP7D3	down	1.44	0.0151	chrX(-):135295381-135338642	UCSC	MAP7 domain containing 3	FLJ12649	AL832120	79649	ENSG00000129680	8.79	8.26	No
GSHG0032039	RPGR	down	1.44	0.0313	chrX(-):38128602-38186795	UCSC	retinitis pigmentosa GTPase regulator	COD1 // CRD // RP15 // RP3 // CORDX1	AK291832	6103	ENSG00000156313	7.59	7.06	No
GSHG0031156	PPP6C	down	1.44	0.0213	chr9(-):127911659-127952083	UCSC	protein phosphatase 6, catalytic subunit	PP6	AK295190	5537	ENSG00000119414	10.52	9.99	No
GSHG0030918	AGTPBP1	down	1.44	0.0396	chr9(-):88161455-88356944	UCSC	ATP/GTP binding protein 1	KIAA1035 // Nna1	AK001544	23287	ENSG00000135049	8.43	7.9	No
GSHG0030434	---	down	1.44	0.0408	chr9(+):125815274-125816878	UCSC	---	---	AF113012	---	---	6.43	5.91	No
GSHG0003528	FAM35A	down	1.44	0.0293	chr10(+):88854953-88951220	UCSC	family with sequence similarity 35, member A	bA163M19.1 // FAM35A1 // MGC5560	AK022978	54537	ENSG00000122376	6.95	6.42	No
GSHG0003511	GHITM	down	1.44	0.00998	chr10(+):85899240-85913311	UCSC	growth hormone inducible transmembrane protein	DERP2 // HSPC282 // My021 // PTD010 // TMBIM5	AF078863	27069	ENSG00000165678	8.78	8.25	No
GSHG0003275	WAC	down	1.44	0.0328	chr10(+):28821700-28909697	UCSC	WW domain containing adaptor with coiled-coil	BM-016 // FLJ31290 // MGC10753 // PRO1741 // Wwp4	AK223600	51322	ENSG00000095787	9.55	9.03	No
GSHG0023429	LAMTOR3	down	1.44	0.0263	chr4(-):100802256-100815596	UCSC	late endosomal/lysosomal adaptor, MAPK and MTOR activator 3	MAP2K1IP1 // MAPKSP1 // MAPBP // MP1 // Ragulator3	AK223311	8649	ENSG00000109270	8.14	7.61	No
GSHG0022157	GPR87	down	1.44	0.00542	chr3(-):151011891-151034636	UCSC	G protein-coupled receptor 87	GPR95	AK027784	53836	ENSG00000138271	6.26	5.73	No
GSHG0020983	C3orf26	down	1.44	0.00368	chr3(+):99536678-99897446	UCSC	chromosome 3 open reading frame 26	MGC4308	BC006512	84319	ENSG00000184220	8.42	7.9	No
GSHG0018989	PCNA	down	1.44	0.0386	chr20(-):5095603-5107188	UCSC	proliferating cell nuclear antigen	---	AK300558	5111	ENSG00000132646	10.15	9.62	No
GSHG0018876	C20orf177	down	1.44	0.00516	chr20(+):58508819-58522559	UCSC	chromosome 20 open reading frame 177	dJ551D2.5	AK125073	63939	ENSG00000196227	8.05	7.52	No
GSHG0016711	PDCL3	down	1.44	0.0461	chr2(+):101179152-101193296	UCSC	phosducin-like 3	VIAF1	AK300827	79031	ENSG00000115539	7.53	7	Yes
GSHG0015528	ZNF442	down	1.43	0.0217	chr19(-):12460185-12476455	UCSC	zinc finger protein 442	FLJ14356	AK024418	79973	ENSG00000198342	6.63	6.12	No
GSHG0015480	ZNF121	down	1.43	0.0158	chr19(-):9672859-9695208	UCSC	zinc finger protein 121	D19S204 // ZHC32 // ZNF20	AK297919	7675	ENSG00000197961	9.27	8.75	Yes
GSHG0012600	---	down	1.43	0.0384	chr17(+):46371699-46385037	UCSC	---	---	S71020	---	---	7.5	6.98	No
GSHG0011292	NUTF2	down	1.43	0.0222	chr16(+):67880819-67905218	UCSC	nuclear transport factor 2	NTF2 // PP15	X07315	10204	ENSG00000102898	10.58	10.07	No
GSHG0001807	---	down	1.43	0.0352	chr1(-):19619743-19622230	UCSC	---	---	AK094604	---	---	6.39	5.88	No
GSHG0009333	RPL10L	down	1.43	0.0121	chr14(-):47120298-47121294	UCSC	ribosomal protein L10-like	---	AM392934	140801	ENSG00000165496	11.74	11.22	No
GSHG0009291	STRN3	down	1.43	0.0372	chr14(-):31363089-31495596	UCSC	striatin, calmodulin binding protein 3	SG2NA	U17989	29966	ENSG00000196792	7.89	7.37	No
GSHG0007777	VPS29	down	1.43	0.0282	chr12(-):110929328-110939945	UCSC	vacuolar protein sorting 29 homolog (S. cerevisiae)	DC15 // DC7 // PEP11	AF168716	51699	ENSG00000111237	9.36	8.84	No
GSHG0000931	HIST2H2AC	down	1.43	0.0329	chr1(+):149858490-149858920	UCSC	histone cluster 2, H2ac	H2A // H2AFQ // H2A/q	BC060324	8338	ENSG00000184260	11.29	10.78	No
GSHG0005860	ATL3	down	1.43	0.0345	chr11(-):63391560-63439444	UCSC	atlastin GTPase 3	DKFZP564J0863	CR936784	25923	ENSG00000184743	8.41	7.89	Yes
GSHG0004394	PDZD8	down	1.43	0.00592	chr10(-):119042606-119163912	UCSC	PDZ domain containing 8	PDZK8 // bA129M16.2 // FLJ34427	JF432830	118987	ENSG00000165650	7.86	7.34	No
GSHG0003987	ITGB1	down	1.43	0.006	chr10(-):33189321-33247147	UCSC	integrin, beta 1 (fibronectin receptor, beta polypeptide, antigen CD29 includes MDF2, MSK12)	FNRB // MDF2 // MSK12 // CD29 // GPIIA	BX537407	3688	ENSG00000150093	8.91	8.39	No
GSHG0032238	TMSB15A	down	1.43	0.00818	chrX(-):101768605-101771673	UCSC	thymosin beta 15a	TMSL8 // TMSNB	D82345	11013	ENSG00000158164	7.98	7.47	No
GSHG0031804	XPNPEP2	down	1.43	0.0278	chrX(+):128872925-128903525	UCSC	X-prolyl aminopeptidase (aminopeptidase P) 2, membrane-bound	---	U90724	7512	ENSG00000122121	7.11	6.59	No
GSHG0013626	---	down	1.43	0.00148	chr17(-):58511039-58513357	UCSC	---	---	AX746718	---	---	10.05	9.53	Yes
GSHG0030952	IARS	down	1.43	0.0403	chr9(-):94972622-95055988	UCSC	isoleucyl-tRNA synthetase	IARS1 // ILRS	AK301272	3376	ENSG00000196305	9.31	8.8	No
GSHG0029873	TMEM71	down	1.43	0.0178	chr8(-):133722193-133772832	UCSC	transmembrane protein 71	FLJ33069	BC105783	137835	ENSG00000165071	9.57	9.05	No
GSHG0029771	SLC25A32	down	1.43	0.0491	chr8(-):104410867-104427332	UCSC	solute carrier family 25, member 32	MFTC	BC021893	81034	ENSG00000164933	8.53	8.01	Yes
GSHG0029761	RRM2B	down	1.43	0.0233	chr8(-):103216730-103251346	UCSC	ribonucleotide reductase M2 B (TP53 inducible)	p53R2	AB036063	50484	ENSG00000048392	6.77	6.25	No
GSHG0029731	MTERFD1	down	1.43	0.0476	chr8(-):97251626-97273838	UCSC	MTERF domain containing 1	CGI-12 // FLJ10939	AK309002	51001	ENSG00000156469	7.22	6.7	Yes
GSHG0029232	FAM91A1	down	1.43	0.0289	chr8(+):124780695-124827688	UCSC	family with sequence similarity 91, member A1	FLJ23790	BC030520	157769	ENSG00000176853	8.86	8.34	No
GSHG0028006	---	down	1.43	0.0138	chr7(-):10489448-10601205	UCSC	---	---	BC002644	---	---	6.72	6.21	Yes
GSHG0026290	EEF1E1	down	1.43	0.0385	chr6(-):8079639-8102782	UCSC	eukaryotic translation elongation factor 1 epsilon 1	P18 // AIMP3	BC005291	9521	ENSG00000124802	7.98	7.47	No
GSHG0025418	PAK1IP1	down	1.43	0.0362	chr6(+):10695183-10709968	UCSC	PAK1 interacting protein 1	bA421M1.5 // FLJ20624 // hPIP1 // MAK11 // PIP1 // WDR84	AK225516	55003	ENSG00000111845	8.32	7.8	No
GSHG0024275	MATR3 // SNHG4	down	1.43	0.0101	chr5(+):138609441-138667047	UCSC	matrin 3 // small nucleolar RNA host gene 4 (non-protein coding)	MPD2 // KIAA0723 // MGC9105 // NCRNA00059 // U19H // VCPDM	BC036498	724102 // 9782	ENSG00000015479	10.29	9.77	No
GSHG0003207	CDC123	down	1.43	0.0142	chr10(+):12237965-12292587	UCSC	cell division cycle 123 homolog (S. cerevisiae)	C10orf7 // D123	D14878	8872	ENSG00000151465	9.22	8.7	No
GSHG0024149	SRP19 // ZRSR2	down	1.43	0.00678	chr5(+):112196977-112228776	UCSC	signal recognition particle 19kDa // zinc finger (CCCH type), RNA-binding motif and serine/arginine rich 2	U2AF1L2 // U2AF1-RS2 // URP	AK313576	6728 // 8233	ENSG00000153037 // ENSG00000169249	8.2	7.69	No
GSHG0002823	ZBTB41	down	1.43	0.0479	chr1(-):197124309-197169672	UCSC	zinc finger and BTB domain containing 41	DKFZp686C06120 // FLJ36199 // FRBZ1 // ZNF924	BC136600	360023	ENSG00000177888	8.48	7.97	No
GSHG0018924	TPD52L2	down	1.43	0.014	chr20(+):62496596-62522894	UCSC	tumor protein D52-like 2	D54 // hD54	AK055068	7165	ENSG00000101150	8.55	8.03	No
GSHG0002415	REG4	down	1.43	0.0256	chr1(-):120336641-120354203	UCSC	regenerating islet-derived family, member 4	GISP // REG-IV // RELP	AY126670	83998	ENSG00000134193	7.88	7.37	No
GSHG0002407	WARS2	down	1.43	0.0442	chr1(-):119573841-119683294	UCSC	tryptophanyl tRNA synthetase 2, mitochondrial	TrpRS	BC044575	10352	ENSG00000116874	6.98	6.47	No
GSHG0014749	ZNF714	down	1.42	0.0201	chr19(+):21265002-21307881	UCSC	zinc finger protein 714	---	BC037782	148206	ENSG00000160352	9.06	8.56	No
GSHG0014707	MPV17L2	down	1.42	0.00972	chr19(+):18304040-18307758	UCSC	MPV17 mitochondrial membrane protein-like 2	FKSG24 // MGC12972	BC028146	84769	ENSG00000254858	8.51	8	No
GSHG0013528	HOXB2	down	1.42	0.0497	chr17(-):46620021-46622351	UCSC	homeobox B2	HOX2 // HOX2H	X16665	3212	ENSG00000173917	9.47	8.96	Yes
GSHG0013140	ZNF624	down	1.42	0.0313	chr17(-):16524051-16557158	UCSC	zinc finger protein 624	KIAA1349	AK131401	57547	ENSG00000197566	6.56	6.05	Yes
GSHG0012649	UTP18	down	1.42	0.0452	chr17(+):49337889-49375296	UCSC	UTP18 small subunit (SSU) processome component homolog (yeast)	WDR50 // CGI-48	AK026355	51096	ENSG00000011260	8.28	7.77	No
GSHG0011433	MAP1LC3B	down	1.42	0.00214	chr16(+):87425406-87438382	UCSC	microtubule-associated protein 1 light chain 3 beta	ATG8F	BC041874	81631	ENSG00000140941	9.74	9.23	No
GSHG0011351	PSMD7	down	1.42	0.0123	chr16(+):74330686-74340175	UCSC	proteasome (prosome, macropain) 26S subunit, non-ATPase, 7	MOV34 // P40 // Rpn8 // S12	D50063	5713	ENSG00000103035	9.69	9.18	No
GSHG0010445	NEDD4	down	1.42	0.0479	chr15(-):56119131-56285835	UCSC	neural precursor cell expressed, developmentally down-regulated 4	KIAA0093 // MGC176705 // NEDD4-1 // RPF1	D42055	4734	ENSG00000069869	7.72	7.22	Yes
GSHG0010362	LCMT2	down	1.42	0.0322	chr15(-):43620484-43622781	UCSC	leucine carboxyl methyltransferase 2	KIAA0547 // MGC9534 // PPM2 // TYW4	AK300820	9836	ENSG00000168806	7.75	7.24	No
GSHG0009798	NUSAP1	down	1.42	0.039	chr15(+):41625051-41673247	UCSC	nucleolar and spindle associated protein 1	ANKT // BM037 // FLJ13421 // LNP // NuSAP1 // PRO0310p1 // Q0310 // SAPL	AK222819	51203	ENSG00000137804	10.95	10.45	No
GSHG0009497	MLH3	down	1.42	0.0479	chr14(-):75483070-75518156	UCSC	mutL homolog 3 (E. coli)	---	AF195657	27030	ENSG00000119684	8.16	7.65	No
GSHG0009299	EAPP	down	1.42	0.043	chr14(-):34985135-35008924	UCSC	E2F-associated phosphoprotein	C14orf11 // BM036 // FLJ20578	AY157300	55837	ENSG00000129518	8.78	8.28	No
GSHG0008873	DAAM1	down	1.42	0.0173	chr14(+):59655362-59836471	UCSC	dishevelled associated activator of morphogenesis 1	KIAA0666	BC038428	23002	ENSG00000100592	7.21	6.71	No
GSHG0008724	C14orf119	down	1.42	0.005	chr14(+):23564712-23569664	UCSC	chromosome 14 open reading frame 119	FLJ20671	BC009645	55017	ENSG00000179933	8.41	7.9	No
GSHG0008484	LPAR6	down	1.42	0.0368	chr13(-):48963707-49018841	UCSC	lysophosphatidic acid receptor 6	P2RY5 // P2Y5	BC039373	10161	ENSG00000139679	8.39	7.88	No
GSHG0008104	ITM2B	down	1.42	0.0355	chr13(+):48807294-48836232	UCSC	integral membrane protein 2B	BRI // E25B // E3-16	AF136973	9445	ENSG00000136156	11.2	10.69	No
GSHG0007556	ATP5B	down	1.42	0.0258	chr12(-):57031961-57039768	UCSC	ATP synthase, H+ transporting, mitochondrial F1 complex, beta polypeptide	ATPSB	AK291085	506	ENSG00000110955	11.78	11.27	No
GSHG0006976	PWP1	down	1.42	0.0349	chr12(+):108079557-108106379	UCSC	PWP1 homolog (S. cerevisiae)	IEF-SSP-9502	AK297961	11137	ENSG00000136045	8.72	8.21	No
GSHG0001001	RPS27	down	1.42	0.0179	chr1(+):153963238-153964623	UCSC	ribosomal protein S27	MPS-1 // MPS1 // S27	L19739	6232	ENSG00000177954	9.33	8.82	No
GSHG0005849	SNHG1	down	1.42	0.0222	chr11(-):62619461-62623357	UCSC	small nucleolar RNA host gene 1 (non-protein coding)	LINC00057 // NCRNA00057 // UHG	AK095849	23642	ENSG00000255717	9.7	9.19	No
GSHG0005684	FBXO3	down	1.42	0.02	chr11(-):33762485-33796071	UCSC	F-box protein 3	FBA // FBX3	AK001943	26273	ENSG00000110429	7.88	7.37	No
GSHG0005588	RNF141	down	1.42	0.0335	chr11(-):10535676-10562773	UCSC	ring finger protein 141	ZFP26 // ZNF230	AK289764	50862	ENSG00000110315	7.53	7.02	No
GSHG0004489	IFITM2	down	1.42	0.0413	chr11(+):308163-309395	UCSC	interferon induced transmembrane protein 2 (1-8D)	1-8D	BC009696	10581	ENSG00000185201	9.96	9.46	No
GSHG0004252	IDE	down	1.42	0.0258	chr10(-):94212005-94333833	UCSC	insulin-degrading enzyme	---	BX648462	3416	ENSG00000119912	8.56	8.05	No
GSHG0030138	---	down	1.42	0.0157	chr9(+):42152662-42156535	UCSC	---	---	BC041869	---	---	6.69	6.18	Yes
GSHG0030795	HINT2	down	1.42	0.0369	chr9(-):35812954-35815349	UCSC	histidine triad nucleotide binding protein 2	---	BC033538	84681	ENSG00000137133	9.47	8.97	No
GSHG0030395	---	down	1.42	0.0369	chr9(+):117664218-117664893	UCSC	---	---	AF086214	---	---	6.19	5.68	No
GSHG0030332	SMC2	down	1.42	0.042	chr9(+):106856541-106903690	UCSC	structural maintenance of chromosomes 2	SMC2L1 // CAP-E // hCAP-E	AL833191	10592	ENSG00000136824	8.83	8.32	No
GSHG0029314	EXOSC4	down	1.42	0.0267	chr8(+):145133529-145135550	UCSC	exosome component 4	FLJ20591 // hRrp41p // p12A // RRP41 // RRP41A // Rrp41p // SKI6 // Ski6p	AF281133	54512	ENSG00000178896	8.5	7.99	No
GSHG0029226	---	down	1.42	0.027	chr8(+):124026193-124027224	UCSC	---	---	AF116708	---	---	6.46	5.95	No
GSHG0000505	OSBPL9	down	1.42	0.0254	chr1(+):52042851-52254136	UCSC	oxysterol binding protein-like 9	---	AK128043	114883	ENSG00000117859	9.99	9.49	No
GSHG0033565	---	down	1.42	0.00612	chr8(+):33356372-33366164	UCSC	---	---	AL049422	---	---	8.66	8.16	No
GSHG0003386	---	down	1.42	0.0166	chr10(+):60472266-60474631	UCSC	---	---	AK021801	---	---	7	6.49	Yes
GSHG0033452	PPIL4	down	1.42	0.0261	chr6(-):149825631-149867238	UCSC	peptidylprolyl isomerase (cyclophilin)-like 4	---	AF357880	85313	ENSG00000131013	7.7	7.19	No
GSHG0024431	CCNG1	down	1.42	0.0168	chr5(+):162864575-162875203	UCSC	cyclin G1	CCNG	BX538035	900	ENSG00000113328	10.37	9.86	No
GSHG0023757	MTRR	down	1.42	0.0312	chr5(+):7869217-7901233	UCSC	5-methyltetrahydrofolate-homocysteine methyltransferase reductase	cblE	AF121214	4552	ENSG00000124275	9.07	8.56	No
GSHG0022269	DCUN1D1	down	1.42	0.0397	chr3(-):182660160-182698326	UCSC	DCN1, defective in cullin neddylation 1, domain containing 1 (S. cerevisiae)	DCUN1L1 // RP42 // SCCRO // SCRO // Tes3	AF292100	54165	ENSG00000043093	8.94	8.43	No
GSHG0021571	SGOL1	down	1.42	0.0441	chr3(-):20202083-20227713	UCSC	shugoshin-like 1 (S. pombe)	NY-BR-85	BC017867	151648	ENSG00000129810	9.02	8.51	No
GSHG0021363	B3GNT5	down	1.42	0.0055	chr3(+):182971045-182991172	UCSC	UDP-GlcNAc:betaGal beta-1,3-N-acetylglucosaminyltransferase 5	B3GN-T5 // beta3Gn-T5	AB209517	84002	ENSG00000176597	7.36	6.86	No
GSHG0021350	ACTL6A	down	1.42	0.00828	chr3(+):179280697-179306194	UCSC	actin-like 6A	Actl6 // Arp4 // BAF53A // INO80K	AK098691	86	ENSG00000136518	8.72	8.22	No
GSHG0019144	EIF6	down	1.42	0.00416	chr20(-):33866722-33872595	UCSC	eukaryotic translation initiation factor 6	EIF3A // ITGB4BP // b(2)gcn // p27BBP	AF047433	3692	ENSG00000242372	9.21	8.7	No
GSHG0018674	MAPRE1	down	1.42	0.00726	chr20(+):31407760-31438210	UCSC	microtubule-associated protein, RP/EB family, member 1	EB1	BC106068	22919	ENSG00000101367	9.93	9.43	No
GSHG0018551	MCM8	down	1.42	0.00288	chr20(+):5931298-5975672	UCSC	minichromosome maintenance complex component 8	C20orf154 // dJ967N21.5 // MGC119522 // MGC119523 // MGC12866 // MGC4816 // REC	AK297806	84515	ENSG00000125885	9.66	9.16	No
GSHG0017254	FBXO36	down	1.42	0.0192	chr2(+):230787018-230975718	UCSC	F-box protein 36	Fbx36 // FLJ37592	AK309702	130888	ENSG00000153832	6.73	6.22	No
GSHG0015844	EXOSC5	down	1.42	0.0261	chr19(-):41892275-41903384	UCSC	exosome component 5	hRrp46p // MGC12901 // p12B // RRP41B // RRP46 // Rrp46p	AF285785	56915	ENSG00000077348	8.52	8.01	No
GSHG0013906	NDUFV2	down	1.41	0.0103	chr18(+):9102710-9134342	UCSC	NADH dehydrogenase (ubiquinone) flavoprotein 2, 24kDa	CI-24k	BC001632	4729	ENSG00000178127	8.87	8.38	No
GSHG0012940	---	down	1.41	0.0262	chr17(-):289773-292356	UCSC	---	---	AK093557	---	---	10.51	10.01	No
GSHG0012361	EFCAB5	down	1.41	0.0187	chr17(+):28256873-28435469	UCSC	EF-hand calcium binding domain 5	FLJ46247	BC137519	374786	ENSG00000176927	6.9	6.41	No
GSHG0010635	CTSH	down	1.41	0.00734	chr15(-):79214108-79237389	UCSC	cathepsin H	CPSB // ACC-4 // ACC-5	AK130158	1512	ENSG00000103811	8.59	8.09	No
GSHG0009355	MAP4K5	down	1.41	0.03	chr14(-):50885211-50999376	UCSC	mitogen-activated protein kinase kinase kinase kinase 5	GCKR // KHS // KHS1	BC036013	11183	ENSG00000012983	8.5	8.01	No
GSHG0009255	C14orf167	down	1.41	0.0486	chr14(-):24408825-24423376	UCSC	chromosome 14 open reading frame 167	PRO1488	BX647964	55449	ENSG00000215256	9.1	8.6	Yes
GSHG0008622	C13orf27	down	1.41	0.029	chr13(-):103418465-103426142	UCSC	chromosome 13 open reading frame 27	---	BC015148	93081	ENSG00000151287	7.52	7.02	No
GSHG0007700	LTA4H	down	1.41	0.0479	chr12(-):96394609-96437298	UCSC	leukotriene A4 hydrolase	---	BX647158	4048	ENSG00000111144	8.48	7.98	No
GSHG0006913	METAP2	down	1.41	0.028	chr12(+):95867296-95908532	UCSC	methionyl aminopeptidase 2	MAP2 // MNPEP // p67	AK125296	10988	ENSG00000111142	8.64	8.14	No
GSHG0006826	MDM2	down	1.41	0.0336	chr12(+):69195239-69234214	UCSC	Mdm2 p53 binding protein homolog (mouse)	HDM2 // HDMX // MGC5370	BC148522	4193	ENSG00000135679	9.86	9.36	No
GSHG0006798	TBK1	down	1.41	0.0293	chr12(+):64845895-64895886	UCSC	TANK-binding kinase 1	NAK	BC034950	29110	ENSG00000183735	6.49	6	Yes
GSHG0006075	PICALM	down	1.41	0.0263	chr11(-):85668486-85780900	UCSC	phosphatidylinositol binding clathrin assembly protein	CALM // CLTH	BC048259	8301	ENSG00000073921	9.93	9.44	No
GSHG0005395	FLI1	down	1.41	0.0445	chr11(+):128556430-128682310	UCSC	Friend leukemia virus integration 1	EWSR2 // SIC-1	AK294279	2313	ENSG00000151702	9.56	9.07	No
GSHG0004286	EXOSC1	down	1.41	0.0121	chr10(-):99191024-99205763	UCSC	exosome component 1	CGI-108 // CSL4 // Csl4p // hCsl4p // p13 // SKI4 // Ski4p	AF151866	51013	ENSG00000171311	8.96	8.47	No
GSHG0004180	AP3M1	down	1.41	0.0356	chr10(-):75881526-75910603	UCSC	adaptor-related protein complex 3, mu 1 subunit	---	AK026983	26985	ENSG00000185009	9.39	8.89	Yes
GSHG0031815	---	down	1.41	0.0054	chrX(+):131157327-131209976	UCSC	---	---	AB040057	---	---	10.28	9.79	No
GSHG0031192	C9orf114	down	1.41	0.00806	chr9(-):131581932-131592100	UCSC	chromosome 9 open reading frame 114	CENP-32 // HSPC109	AL110193	51490	ENSG00000198917	9.35	8.86	No
GSHG0030992	ZNF510	down	1.41	0.0366	chr9(-):99518147-99540381	UCSC	zinc finger protein 510	KIAA0972	AB023189	22869	ENSG00000081386	7.53	7.03	No
GSHG0030323	C9orf30 // TMEFF1	down	1.41	0.0262	chr9(+):103189635-103339916	UCSC	chromosome 9 open reading frame 30 // transmembrane protein with EGF-like and two follistatin-like domains 1	C9orf2 // CT120.1 // H7365 // MGC17337	AL831919	8577 // 91283	ENSG00000066697 // ENSG00000241697	7.2	6.7	No
GSHG0029841	TATDN1	down	1.41	0.0133	chr8(-):125500751-125551329	UCSC	TatD DNase domain containing 1	CDA11	BC007066	83940	ENSG00000147687	7.02	6.53	No
GSHG0029210	MED30	down	1.41	0.0487	chr8(+):118533030-118552499	UCSC	mediator complex subunit 30	THRAP6 // TRAP25	BC008226	90390	ENSG00000164758	8.71	8.21	No
GSHG0024996	REEP5	down	1.41	0.00754	chr5(-):112212081-112258013	UCSC	receptor accessory protein 5	C5orf18 // D5S346 // DP1 // TB2	BX648005	7905	ENSG00000129625	8.51	8.02	No
GSHG0024706	AMACR // C1QTNF3	down	1.41	0.00852	chr5(-):33987279-34124640	UCSC	alpha-methylacyl-CoA racemase // C1q and tumor necrosis factor related protein 3	2310005P21Rik // Corcs // Cors // Cors-26 // CTRP3 // RACE	AB209261	114899 // 23600	ENSG00000082196 // ENSG00000242110	8.17	7.68	No
GSHG0023963	KIF2A	down	1.41	0.0301	chr5(+):61602078-61682211	UCSC	kinesin heavy chain member 2A	KIF2 // HK2	BC047544	3796	ENSG00000068796	9.19	8.7	Yes
GSHG0002972	---	down	1.41	0.0183	chr1(-):221456613-221458526	UCSC	---	---	BC030526	---	---	6.54	6.04	Yes
GSHG0017724	EXOC6B	down	1.41	0.0232	chr2(-):72403114-73053154	UCSC	exocyst complex component 6B	SEC15B // SEC15L2 // KIAA0919	AK026474	23233	ENSG00000144036	7.33	6.84	No
GSHG0014779	URI1	down	1.4	0.0355	chr19(+):30414551-30506611	UCSC	URI1, prefoldin-like chaperone	C19orf2 // FLJ10575 // NNX3 // PPP1R19 // RMP // URI	BC026184	8725	ENSG00000105176	9.25	8.77	No
GSHG0014560	UBL5	down	1.4	0.0191	chr19(+):9938568-9940791	UCSC	ubiquitin-like 5	---	AK128885	59286	ENSG00000198258	9.65	9.17	No
GSHG0013864	USP14	down	1.4	0.0262	chr18(+):158536-212601	UCSC	ubiquitin specific peptidase 14 (tRNA-guanine transglycosylase)	TGT	BC003556	9097	ENSG00000101557	8.86	8.37	No
GSHG0013359	KRT222 // SMARCE1	down	1.4	0.042	chr17(-):38783982-38821398	UCSC	keratin 222 // SWI/SNF related, matrix associated, actin dependent regulator of chromatin, subfamily e, member 1	KRT222P // BAF57 // KA21 // MGC45562	AK092967	125113 // 6605	ENSG00000073584 // ENSG00000213424	9.75	9.27	No
GSHG0013133	ZSWIM7	down	1.4	0.003	chr17(-):15879880-15902998	UCSC	zinc finger, SWIM-type containing 7	SWS1	BC018807	125150	ENSG00000214941	7.74	7.25	No
GSHG0012446	PSMB3	down	1.4	0.016	chr17(+):36909003-36920477	UCSC	proteasome (prosome, macropain) subunit, beta type, 3	HC10-II // MGC4147	BC013008	5691	ENSG00000108294	9.79	9.3	No
GSHG0012437	MRPL45	down	1.4	0.0354	chr17(+):36453023-36479100	UCSC	mitochondrial ribosomal protein L45	MGC11321	AK172741	84311	ENSG00000174100	9.59	9.1	No
GSHG0012410	AP2B1	down	1.4	0.032	chr17(+):33914293-34053428	UCSC	adaptor-related protein complex 2, beta 1 subunit	ADTB2 // CLAPB1	M34175	163	ENSG00000006125	9.63	9.15	No
GSHG0011496	C16orf13	down	1.4	0.0475	chr16(-):684430-686316	UCSC	chromosome 16 open reading frame 13	MGC13114	AK057077	84326	ENSG00000249124	8.84	8.36	No
GSHG0011217	MT1F	down	1.4	0.0429	chr16(+):56691643-56693214	UCSC	metallothionein 1F	MT1	BC108722	4494	ENSG00000198417	10.4	9.92	No
GSHG0007972	SAP18	down	1.4	0.0257	chr13(+):21714685-21722974	UCSC	Sin3A-associated protein, 18kDa	2HOR0202 // MGC27131 // SAP18p	BC030836	10284	ENSG00000150459	9.49	9	Yes
GSHG0007834	WSB2	down	1.4	0.0423	chr12(-):118470712-118499980	UCSC	WD repeat and SOCS box containing 2	MGC10210 // SBA2	BC015887	55884	ENSG00000176871	8.68	8.19	No
GSHG0001230	TOR1AIP1	down	1.4	0.0477	chr1(+):179851177-179889205	UCSC	torsin A interacting protein 1	FLJ13142 // LAP1B	AK023204	26092	ENSG00000143337	9.69	9.2	No
GSHG0007256	MAGOHB	down	1.4	0.0404	chr12(-):10756794-10766204	UCSC	mago-nashi homolog B (Drosophila)	FLJ10292 // MGN2	AK022720	55110	ENSG00000111196	8.4	7.91	No
GSHG0006044	KCTD14	down	1.4	0.0304	chr11(-):77726762-77757237	UCSC	potassium channel tetramerisation domain containing 14	MGC2376	AK313892	65987	ENSG00000151364	6.89	6.4	Yes
GSHG0003949	YME1L1	down	1.4	0.0493	chr10(-):27399385-27444195	UCSC	YME1-like 1 (S. cerevisiae)	---	AJ132637	10730	ENSG00000136758	9.99	9.5	No
GSHG0031809	RAB33A	down	1.4	0.0291	chrX(+):129305643-129318846	UCSC	RAB33A, member RAS oncogene family	RabS10	D14889	9363	ENSG00000134594	8.07	7.58	No
GSHG0031781	UBE2A	down	1.4	0.0268	chrX(+):118708498-118718385	UCSC	ubiquitin-conjugating enzyme E2A	HHR6A // RAD6A // UBC2	AK223064	7319	ENSG00000077721	9.61	9.13	No
GSHG0031138	ZBTB26	down	1.4	0.0331	chr9(-):125680379-125693779	UCSC	zinc finger and BTB domain containing 26	ZNF481	BC018748	57684	ENSG00000171448	7.53	7.04	No
GSHG0031117	RAB14	down	1.4	0.0215	chr9(-):123940416-123964164	UCSC	RAB14, member RAS oncogene family	FBP // RAB-14	AL162081	51552	ENSG00000119396	9.66	9.17	No
GSHG0030658	RANBP6	down	1.4	0.0462	chr9(-):6011878-6015614	UCSC	RAN binding protein 6	---	AK300408	26953	ENSG00000137040	7.36	6.87	No
GSHG0030477	SWI5	down	1.4	0.0454	chr9(+):131038425-131051267	UCSC	SWI5 recombination repair homolog (yeast)	C9orf119 // bA395P17.9	BC029911	375757	ENSG00000175854	6.54	6.05	No
GSHG0003416	SRGN	down	1.4	0.0235	chr10(+):70847868-70864558	UCSC	serglycin	PRG // PRG1 // PPG	BC015516	5552	ENSG00000122862	8.68	8.19	No
GSHG0028103	LSM5	down	1.4	0.05	chr7(-):32524951-32530475	UCSC	LSM5 homolog, U6 small nuclear RNA associated (S. cerevisiae)	YER146W	AK024217	23658	ENSG00000106355	8.59	8.1	No
GSHG0003380	UBE2D1	down	1.4	0.027	chr10(+):60094764-60129398	UCSC	ubiquitin-conjugating enzyme E2D 1	SFT // E2(17)KB1 // UBC4/5 // UBCH5 // UbcH5A	BC015997	7321	ENSG00000072401	7.34	6.85	No
GSHG0027221	SNX10	down	1.4	0.0037	chr7(+):26331539-26413938	UCSC	sorting nexin 10	---	BC034992	29887	ENSG00000086300	8.24	7.75	No
GSHG0024994	NREP	down	1.4	0.0414	chr5(-):110998323-111312523	UCSC	neuronal regeneration related protein homolog (rat)	C5orf13 // D4S114 // P311 // PRO1873 // PTZ17 // SEZ17	AK298779	9315	ENSG00000134986	10.45	9.97	No
GSHG0024970	RIOK2	down	1.4	0.0199	chr5(-):96496572-96518944	UCSC	RIO kinase 2 (yeast)	FLJ11159	AK002021	55781	ENSG00000058729	7.43	6.94	No
GSHG0023080	---	down	1.4	0.00546	chr4(-):2412241-2415969	UCSC	---	---	AK126756	---	---	5.67	5.18	No
GSHG0014849	---	down	1.39	0.032	chr19(+):36440386-36442421	UCSC	---	---	AK095672	---	---	6.81	6.34	Yes
GSHG0014772	---	down	1.39	0.04	chr19(+):28284932-28287332	UCSC	---	---	AK095009	---	---	7.99	7.52	Yes
GSHG0014265	TPGS2	down	1.39	0.0038	chr18(-):34376035-34409158	UCSC	tubulin polyglutamylase complex subunit 2	C18orf10 // DKFZP586M1523 // HsT3006	BC087845	25941	ENSG00000134779	10.68	10.2	No
GSHG0014226	ZNF521	down	1.39	0.0181	chr18(-):22641888-22932119	UCSC	zinc finger protein 521	EHZF // Evi3	AK027354	25925	ENSG00000198795	6.69	6.22	No
GSHG0013580	COX11	down	1.39	0.0257	chr17(-):53029267-53046064	UCSC	COX11 cytochrome c oxidase assembly homolog (yeast)	COX11P	AF044321	1353	ENSG00000166260	8.59	8.11	No
GSHG0033269	NUP88	down	1.39	0.0147	chr17(-):5289420-5322986	UCSC	nucleoporin 88kDa	MGC8530	Y08612	4927	ENSG00000108559	9.63	9.16	No
GSHG0011714	PALB2	down	1.39	0.046	chr16(-):23614475-23652631	UCSC	partner and localizer of BRCA2	FANCN // FLJ21816	BX647130	79728	ENSG00000083093	7.66	7.18	No
GSHG0009950	ZWILCH	down	1.39	0.0431	chr15(+):66797431-66841820	UCSC	Zwilch, kinetochore associated, homolog (Drosophila)	FLJ10036 // KNTC1AP	BX640701	55055	ENSG00000174442	8.14	7.66	Yes
GSHG0009783	CASC5	down	1.39	0.0304	chr15(+):40886218-40956537	UCSC	cancer susceptibility candidate 5	AF15Q14 // CT29 // D40 // hKNL-1 // hSpc105 // KNL1 // PPP1R55	AF173994	57082	ENSG00000137812	10.08	9.6	No
GSHG0009534	GALC	down	1.39	0.0487	chr14(-):88304164-88459848	UCSC	galactosylceramidase	---	AK302519	2581	ENSG00000054983	7.38	6.9	No
GSHG0009351	SOS2	down	1.39	0.0216	chr14(-):50584683-50698091	UCSC	son of sevenless homolog 2 (Drosophila)	---	BC143367	6655	ENSG00000100485	8.82	8.34	No
GSHG0006596	IRAK4	down	1.39	0.0199	chr12(+):44152743-44181899	UCSC	interleukin-1 receptor-associated kinase 4	NY-REN-64	AF155118	51135	ENSG00000198001	8.24	7.76	No
GSHG0005524	TRIM5	down	1.39	0.0269	chr11(-):5684788-5959849	UCSC	tripartite motif containing 5	RNF88 // TRIM5alpha	BC020770	85363	ENSG00000132256	8.59	8.12	No
GSHG0004729	EIF3M	down	1.39	0.0403	chr11(+):32605344-32624369	UCSC	eukaryotic translation initiation factor 3, subunit M	PCID1 // eIF3m // FLJ29030 // GA17 // hfl-B5	AK304378	10480	ENSG00000149100	8.97	8.5	Yes
GSHG0004420	IKZF5	down	1.39	0.046	chr10(-):124750324-124784210	UCSC	IKAROS family zinc finger 5 (Pegasus)	ZNFN1A5 // FLJ22973 // Pegasus	AK122899	64376	ENSG00000095574	9.73	9.25	No
GSHG0003639	NOLC1	down	1.39	0.0484	chr10(+):103912114-103923627	UCSC	nucleolar and coiled-body phosphoprotein 1	KIAA0035 // NOPP130 // NOPP140 // P130	BC006769	9221	ENSG00000166197	9.24	8.76	Yes
GSHG0032058	FUNDC1	down	1.39	0.00724	chrX(-):44382883-44402216	UCSC	FUN14 domain containing 1	MGC51029	BC042813	139341	ENSG00000069509	7.85	7.38	No
GSHG0032009	EIF1AX	down	1.39	0.0286	chrX(-):20145474-20159966	UCSC	eukaryotic translation initiation factor 1A, X-linked	EIF1A // EIF4C // eIF-1A // eIF-4C	BC110421	1964	ENSG00000173674	8.92	8.44	No
GSHG0031085	POLE3	down	1.39	0.0125	chr9(-):115973466-116172952	UCSC	polymerase (DNA directed), epsilon 3 (p17 subunit)	CHARAC17 // CHRAC17 // p17 // Ybl1	AK074629	54107	ENSG00000148229	9.09	8.61	No
GSHG0030362	DNAJC25	down	1.39	0.00186	chr9(+):114393649-114432508	UCSC	DnaJ (Hsp40) homolog, subfamily C , member 25	bA16L21.2.1	BC015391	548645	ENSG00000059769	10.25	9.78	Yes
GSHG0030291	C9orf102	down	1.39	0.0487	chr9(+):98637968-98801358	UCSC	chromosome 9 open reading frame 102	FLJ37706 // RAD26L	AK307504	375748	ENSG00000182150	8.34	7.87	No
GSHG0029847	KIAA0196	down	1.39	0.0464	chr8(-):126036509-126104025	UCSC	KIAA0196	SPG8	AK296970	9897	ENSG00000164961	8.39	7.91	No
GSHG0028007	NDUFA4	down	1.39	0.0101	chr7(-):10973081-10979774	UCSC	NADH dehydrogenase (ubiquinone) 1 alpha subcomplex, 4, 9kDa	CI-9k // MLRQ	U94586	4697	ENSG00000189043	8.54	8.07	No
GSHG0027624	PSMC2	down	1.39	0.0496	chr7(+):102988107-103009199	UCSC	proteasome (prosome, macropain) 26S subunit, ATPase, 2	MSS1 // Nbla10058 // S7	AB075520	5701	ENSG00000161057	8.89	8.42	No
GSHG0027178	BZW2	down	1.39	0.0423	chr7(+):16685759-16746147	UCSC	basic leucine zipper and W2 domains 2	HSPC028 // MST017 // MSTP017	AF083246	28969	ENSG00000136261	9.28	8.81	No
GSHG0024359	GRPEL2	down	1.39	0.0432	chr5(+):148725056-148734145	UCSC	GrpE-like 2, mitochondrial (E. coli)	DKFZp451C205 // FLJ23713 // Mt-GrpE#2	BC036678	134266	ENSG00000164284	9.32	8.85	No
GSHG0003156	NET1	down	1.39	0.00176	chr10(+):5454558-5500401	UCSC	neuroepithelial cell transforming 1	ARHGEF8 // NET1A	BC053553	10276	ENSG00000173848	8.65	8.18	No
GSHG0022594	---	down	1.39	0.037	chr4(+):54925764-54927372	UCSC	---	---	AF090902	---	---	6.93	6.46	No
GSHG0002959	---	down	1.39	0.0177	chr1(-):217600340-217602209	UCSC	---	---	AK123745	---	---	7.2	6.72	No
GSHG0019114	COMMD7	down	1.39	0.021	chr20(-):31290505-31331819	UCSC	COMM domain containing 7	C20orf92 // dJ1085F17.3	AK096307	149951	ENSG00000149600	8.64	8.17	No
GSHG0018994	TRMT6	down	1.39	0.0246	chr20(-):5918486-5931181	UCSC	tRNA methyltransferase 6 homolog (S. cerevisiae)	CGI-09 // GCD10 // Gcd10p // MGC5029	AK000613	51605	ENSG00000089195	8.99	8.51	No
GSHG0015256	ZNF419	down	1.38	0.0116	chr19(+):57999086-58006048	UCSC	zinc finger protein 419	ZNF419A	AK302135	79744	ENSG00000105136	7.88	7.42	Yes
GSHG0012606	ATP5G1	down	1.38	0.0369	chr17(+):46970129-46973230	UCSC	ATP synthase, H+ transporting, mitochondrial Fo complex, subunit C1 (subunit 9)	ATP5G	AK095669	516	ENSG00000159199	11.11	10.65	No
GSHG0010446	RFX7	down	1.38	0.0289	chr15(-):56379479-56482130	UCSC	regulatory factor X, 7	RFXDC2 // FLJ12994	AK128045	64864	ENSG00000181827	10.19	9.72	No
GSHG0010387	GATM	down	1.38	0.0181	chr15(-):45653322-45675807	UCSC	glycine amidinotransferase (L-arginine:glycine amidinotransferase)	AGAT	AK098393	2628	ENSG00000171766	6.61	6.15	No
GSHG0009104	CCNK	down	1.38	0.00556	chr14(+):99947760-100001381	UCSC	cyclin K	CPR4	AK311075	8812	ENSG00000090061	9.62	9.16	No
GSHG0007639	BBS10	down	1.38	0.0474	chr12(-):76738512-76742207	UCSC	Bardet-Biedl syndrome 10	C12orf58 // FLJ23560	BC026355	79738	ENSG00000179941	7.87	7.4	Yes
GSHG0006923	TMPO	down	1.38	0.0231	chr12(+):98909394-98944126	UCSC	thymopoietin	LAP2 // LEMD4 // TP	BC050383	7112	ENSG00000120802	10.96	10.5	No
GSHG0006122	TMEM123	down	1.38	0.0098	chr11(-):102267067-102323746	UCSC	transmembrane protein 123	KCT3 // PORIMIN	AY008283	114908	ENSG00000152558	11.53	11.07	No
GSHG0005847	STX5	down	1.38	0.0481	chr11(-):62574369-62599561	UCSC	syntaxin 5	STX5A // SED5	BX537426	6811	ENSG00000162236	8.07	7.61	No
GSHG0004721	C11orf46	down	1.38	0.0339	chr11(+):30344649-30359768	UCSC	chromosome 11 open reading frame 46	FLJ38968	BX647617	120534	ENSG00000152219	7.86	7.39	No
GSHG0003974	ZNF438	down	1.38	0.00474	chr10(-):31133562-31320854	UCSC	zinc finger protein 438	bA330O11.1	AK057323	220929	ENSG00000183621	7.17	6.71	No
GSHG0000538	HEATR8 // TTC4	down	1.38	0.0321	chr1(+):55107455-55208326	UCSC	HEAT repeat containing 8 // tetratricopeptide repeat domain 4	C1orf175 // FLJ41930 // FLJ46354 // MGC5097	CR749830	374977 // 7268	ENSG00000184313 // ENSG00000243725	7.81	7.35	Yes
GSHG0000513	GPX7	down	1.38	0.0422	chr1(+):53068042-53074723	UCSC	glutathione peroxidase 7	FLJ14777 // GPX6 // NPGPx	AK027683	2882	ENSG00000116157	8.5	8.04	No
GSHG0031391	MOSPD2	down	1.38	0.0433	chrX(+):14891559-14940442	UCSC	motile sperm domain containing 2	MGC26706	BC030641	158747	ENSG00000130150	7.21	6.74	Yes
GSHG0029736	RPL30	down	1.38	0.0094	chr8(-):99037079-99057778	UCSC	ribosomal protein L30	L30	AK308890	6156	ENSG00000156482	11.93	11.46	No
GSHG0029619	VCPIP1	down	1.38	0.0033	chr8(-):67540724-67579483	UCSC	valosin containing protein (p97)/p47 complex interacting protein 1	DUBA3 // FLJ23132 // KIAA1850 // VCIP135	CR936659	80124	ENSG00000175073	8.27	7.81	No
GSHG0029613	ARMC1	down	1.38	0.0493	chr8(-):66514711-66546432	UCSC	armadillo repeat containing 1	Arcp // FLJ10511	BC018846	55156	ENSG00000104442	8.27	7.81	Yes
GSHG0028031	PRPS1L1	down	1.38	0.0364	chr7(-):18066397-18067486	UCSC	phosphoribosyl pyrophosphate synthetase 1-like 1	PRPSL // PRPS3	M57423	221823	ENSG00000229937	9.09	8.63	Yes
GSHG0027095	PDCD2	down	1.38	0.0251	chr6(-):170884416-170893780	UCSC	programmed cell death 2	RP8 // ZMYND7	S78085	5134	ENSG00000071994	7.8	7.33	No
GSHG0021597	DYNC1LI1	down	1.38	0.0327	chr3(-):32567469-32612350	UCSC	dynein, cytoplasmic 1, light intermediate chain 1	DNCLI1	AK074348	51143	ENSG00000144635	8.72	8.26	No
GSHG0020063	XRCC6	down	1.38	0.0489	chr22(+):42017273-42060052	UCSC	X-ray repair complementing defective repair in Chinese hamster cells 6	G22P1 // D22S671 // D22S731 // KU70 // ML8	AK055786	2547	ENSG00000196419	11	10.54	Yes
GSHG0018590	---	down	1.38	0.0419	chr20(+):17454133-17457537	UCSC	---	---	BC041946	---	---	7.23	6.76	No
GSHG0016056	SIGLEC12	down	1.38	0.042	chr19(-):51994481-52005043	UCSC	sialic acid binding Ig-like lectin 12 (gene/pseudogene)	SIGLECL1 // S2V // Siglec-12 // Siglec-L1 // Siglec-XII // SLG	AY358140	89858	ENSG00000254521	7.56	7.09	No
GSHG0002296	SASS6	down	1.37	0.0252	chr1(-):100549104-100598518	UCSC	spindle assembly 6 homolog (C. elegans)	DKFZp761A078 // FLJ22097 // SAS-6 // SAS6	AY359522	163786	ENSG00000156876	8.57	8.12	No
GSHG0014742	ZNF486	down	1.37	0.0341	chr19(+):20278016-20311299	UCSC	zinc finger protein 486	KRBO2 // MGC2396	BC008936	90649	ENSG00000256229	9.02	8.57	No
GSHG0014289	HDHD2	down	1.37	0.0418	chr18(-):44633779-44676871	UCSC	haloacid dehalogenase-like hydrolase domain containing 2	DKFZP564D1378	AK054590	84064	ENSG00000167220	9.14	8.7	No
GSHG0013915	VAPA	down	1.37	0.00762	chr18(+):9914016-9955150	UCSC	VAMP (vesicle-associated membrane protein)-associated protein A, 33kDa	hVAP-33 // VAP-A	AK292948	9218	ENSG00000101558	10.39	9.94	No
GSHG0013627	APPBP2	down	1.37	0.0128	chr17(-):58520520-58603580	UCSC	amyloid beta precursor protein (cytoplasmic tail) binding protein 2	Hs.84084 // KIAA0228 // PAT1	D86981	10513	ENSG00000062725	7.58	7.12	No
GSHG0013584	MMD	down	1.37	0.0181	chr17(-):53469975-53499321	UCSC	monocyte to macrophage differentiation-associated	MMA // PAQR11	AY424289	23531	ENSG00000108960	9.48	9.02	No
GSHG0002051	---	down	1.37	0.0233	chr1(-):45348620-45350931	UCSC	---	---	AK095730	---	---	6.43	5.97	No
GSHG0010698	MRPL46	down	1.37	0.0421	chr15(-):89002708-89010619	UCSC	mitochondrial ribosomal protein L46	C15orf4 // LIECG2 // P2ECSL	AF210056	26589	ENSG00000173867	8.46	8.01	No
GSHG0009633	HSP90AA1	down	1.37	0.0291	chr14(-):102547106-102606023	UCSC	heat shock protein 90kDa alpha (cytosolic), class A member 1	HSPC1 // HSPCA // FLJ31884 // Hsp89 // Hsp90 // HSP90N	AK056446	3320	ENSG00000080824	11.73	11.27	No
GSHG0009047	TDP1	down	1.37	0.039	chr14(+):90421280-90511106	UCSC	tyrosyl-DNA phosphodiesterase 1	FLJ11090 // SCAN1	AK093235	55775	ENSG00000042088	9.64	9.19	No
GSHG0008692	ANG // RNASE4	down	1.37	0.0049	chr14(+):21152336-21168757	UCSC	angiogenin, ribonuclease, RNase A family, 5 // ribonuclease, RNase A family, 4	RNASE5	AK092422	283 // 6038	ENSG00000181784 // ENSG00000214274	6.95	6.49	No
GSHG0008164	BORA	down	1.37	0.0446	chr13(+):73301981-73330332	UCSC	bora, aurora kinase A activator	C13orf34 // FLJ22624	BC025367	79866	ENSG00000136122	7.64	7.18	No
GSHG0007614	MDM1	down	1.37	0.0106	chr12(-):68688346-68726140	UCSC	Mdm1 nuclear protein homolog (mouse)	---	BC028355	56890	ENSG00000111554	7.43	6.98	No
GSHG0006632	TUBA1C	down	1.37	0.0114	chr12(+):49621709-49667121	UCSC	tubulin, alpha 1c	TUBA6 // bcm948 // MGC10851 // MGC14580	AK293589	84790	ENSG00000167553	9.53	9.08	No
GSHG0031146	PSMB7	down	1.37	0.0322	chr9(-):127115745-127177752	UCSC	proteasome (prosome, macropain) subunit, beta type, 7	Z	GU727627	5695	ENSG00000136930	9.74	9.28	No
GSHG0026581	GLO1	down	1.37	0.0409	chr6(-):38643720-38670921	UCSC	glyoxalase I	GLOD1	D13315	2739	ENSG00000124767	10.22	9.76	No
GSHG0003224	STAM	down	1.37	0.0199	chr10(+):17686181-17757907	UCSC	signal transducing adaptor molecule (SH3 domain and ITAM motif) 1	STAM1	BC030586	8027	ENSG00000136738	10.47	10.01	No
GSHG0023506	CCNA2	down	1.37	0.0393	chr4(-):122738548-122745071	UCSC	cyclin A2	CCN1 // CCNA	AK291931	890	ENSG00000145386	10.18	9.73	Yes
GSHG0023473	ELOVL6	down	1.37	0.0492	chr4(-):110970523-111119771	UCSC	ELOVL fatty acid elongase 6	FLJ23378 // LCE // MGC5487	AK027031	79071	ENSG00000170522	7.56	7.1	No
GSHG0022689	PRDM8	down	1.37	0.0203	chr4(+):81105439-81125480	UCSC	PR domain containing 8	---	BC058908	56978	ENSG00000152784	7.25	6.8	No
GSHG0022241	NCEH1	down	1.37	0.0118	chr3(-):172348436-172429014	UCSC	neutral cholesterol ester hydrolase 1	AADACL1 // KIAA1363 // NCEH	BC028734	57552	ENSG00000144959	7.53	7.07	No
GSHG0020223	MAPK1	down	1.37	0.0386	chr22(-):22112839-22221970	UCSC	mitogen-activated protein kinase 1	PRKM1 // PRKM2 // ERK // ERK2 // MAPK2 // p41mapk	BC099905	5594	ENSG00000100030	10.67	10.22	No
GSHG0019440	MRPS6 // SLC5A3	down	1.37	0.0171	chr21(+):35445823-35515334	UCSC	mitochondrial ribosomal protein S6 // solute carrier family 5 (sodium/myo-inositol cotransporter), member 3	C21orf101 // MRP-S6 // RPMS6 // SMIT	AY061855	64968 // 6526	ENSG00000198743 // ENSG00000243927	8.48	8.03	No
GSHG0018373	FARSB	down	1.37	0.036	chr2(-):223435255-223520813	UCSC	phenylalanyl-tRNA synthetase, beta subunit	FARSLB // FRSB // PheHB	D84430	10056	ENSG00000116120	9.58	9.12	No
GSHG0018181	TTC30A	down	1.37	0.00696	chr2(-):178480187-178483447	UCSC	tetratricopeptide repeat domain 30A	FLJ13946	AK125104	92104	ENSG00000197557	7.79	7.33	Yes
GSHG0033673	---	down	1.37	0.0445	chr2(+):220113870-220115059	UCSC	---	---	BC019915	---	---	6.07	5.62	No
GSHG0013722	HN1	down	1.36	0.00338	chr17(-):73131346-73150778	UCSC	hematological and neurological expressed 1	ARM2 // HN1A	AF086910	51155	ENSG00000189159	10.33	9.88	No
GSHG0013670	GNA13	down	1.36	0.01	chr17(-):63006834-63052920	UCSC	guanine nucleotide binding protein (G protein), alpha 13	G13 // MGC46138	BC036756	10672	ENSG00000120063	9.82	9.37	No
GSHG0012752	BPTF	down	1.36	0.0469	chr17(+):65821637-65980498	UCSC	bromodomain PHD finger transcription factor	FALZ // FAC1 // NURF301	AB032251	2186	ENSG00000171634	9.92	9.48	No
GSHG0012398	CCL2	down	1.36	0.0166	chr17(+):32582300-32584219	UCSC	chemokine (C-C motif) ligand 2	SCYA2 // GDCF-2 // HC11 // MCAF // MCP-1 // MCP1 // MGC9434 // SMC-CF	M24545	6347	ENSG00000108691	7.36	6.92	No
GSHG0011422	COX4I1	down	1.36	0.00894	chr16(+):85833228-85840605	UCSC	cytochrome c oxidase subunit IV isoform 1	COX4 // COX4-1	BC047869	1327	ENSG00000131143	12	11.56	No
GSHG0011236	POLR2C	down	1.36	0.0362	chr16(+):57496572-57505921	UCSC	polymerase (RNA) II (DNA directed) polypeptide C, 33kDa	RPB3	BC003159	5432	ENSG00000102978	8.77	8.33	No
GSHG0010900	ZNF75A	down	1.36	0.0151	chr16(+):3355484-3368574	UCSC	zinc finger protein 75a	FLJ31529	AK056091	7627	ENSG00000162086	8.26	7.82	No
GSHG0010600	PTPN9	down	1.36	0.00766	chr15(-):75759468-75871630	UCSC	protein tyrosine phosphatase, non-receptor type 9	MEG2	BC071574	5780	ENSG00000169410	7.76	7.32	No
GSHG0009967	GLCE	down	1.36	0.000438	chr15(+):69452910-69564544	UCSC	glucuronic acid epimerase	HSEPI // KIAA0836	AY635582	26035	ENSG00000138604	7.23	6.78	No
GSHG0009232	PRMT5	down	1.36	0.0299	chr14(-):23389734-23398661	UCSC	protein arginine methyltransferase 5	HRMT1L5 // SKB1 // SKB1Hs	AF167572	10419	ENSG00000100462	9.16	8.71	No
GSHG0007573	DCTN2	down	1.36	0.0374	chr12(-):57923935-57940992	UCSC	dynactin 2 (p50)	DCTN-50 // RBP50	AK096242	10540	ENSG00000175203	8.61	8.17	No
GSHG0001126	UAP1	down	1.36	0.0259	chr1(+):162531323-162569629	UCSC	UDP-N-acteylglucosamine pyrophosphorylase 1	SPAG2 // AgX // AGX1	BC009377	6675	ENSG00000117143	7.37	6.93	Yes
GSHG0007007	SH2B3	down	1.36	0.0298	chr12(+):111843752-111889426	UCSC	SH2B adaptor protein 3	IDDM20 // LNK	AF055581	10019	ENSG00000111252	8.23	7.79	No
GSHG0006926	---	down	1.36	0.0498	chr12(+):98997629-99000150	UCSC	---	---	AK123210	---	---	5.94	5.5	Yes
GSHG0006834	CCT2	down	1.36	0.0077	chr12(+):69979213-69995354	UCSC	chaperonin containing TCP1, subunit 2 (beta)	Cctb	AF026166	10576	ENSG00000166226	9.34	8.9	No
GSHG0005195	CEP57	down	1.36	0.0354	chr11(+):95523642-95565855	UCSC	centrosomal protein 57kDa	KIAA0092 // Translokin // TSP57	AK098647	9702	ENSG00000166037	8.99	8.54	No
GSHG0004816	---	down	1.36	0.0338	chr11(+):50368318-50379802	UCSC	---	---	AB231716	---	---	7.84	7.4	No
GSHG0031964	FAM9B	down	1.36	0.00666	chrX(-):8992273-9132680	UCSC	family with sequence similarity 9, member B	---	AK128470	171483	ENSG00000177138	6.22	5.77	No
GSHG0031213	QRFP	down	1.36	0.0451	chr9(-):133768815-133769225	UCSC	pyroglutamylated RFamide peptide	26RFa // P518	BC101128	347148	ENSG00000188710	8.57	8.13	No
GSHG0030068	CHMP5	down	1.36	0.0199	chr9(+):33264996-33281977	UCSC	charged multivesicular body protein 5	C9orf83 // SNF7DC2 // CGI-34 // HSPC177 // Vps60	AK295744	51510	ENSG00000086065	8.86	8.41	No
GSHG0029657	TCEB1	down	1.36	0.0389	chr8(-):74857373-74884523	UCSC	transcription elongation factor B (SIII), polypeptide 1 (15kDa, elongin C)	SIII	AL832244	6921	ENSG00000154582	9.7	9.26	No
GSHG0029133	DECR1	down	1.36	0.0239	chr8(+):91013633-91064227	UCSC	2,4-dienoyl CoA reductase 1, mitochondrial	DECR // SDR18C1	AK300069	1666	ENSG00000104325	8.27	7.83	No
GSHG0027179	TSPAN13	down	1.36	0.0174	chr7(+):16793328-16824169	UCSC	tetraspanin 13	TM4SF13 // NET-6	AK093487	27075	ENSG00000106537	8.26	7.82	Yes
GSHG0020232	ZNF280B	down	1.36	0.0206	chr22(-):22837513-22863505	UCSC	zinc finger protein 280B	SUHW2 // ZNF279 // 5'OY11.1 // ZNF632	BC040020	140883	ENSG00000198477	8.13	7.69	No
GSHG0019601	MRPL39	down	1.36	0.0238	chr21(-):26957970-26979797	UCSC	mitochondrial ribosomal protein L39	C21orf92 // FLJ20451 // L39mt // MGC104174 // MGC3400 // MRP-L5 // MSTP003 // PRED22 // PRED66 // RPML5	BC107719	54148	ENSG00000154719	9.05	8.6	No
GSHG0018236	STK17B	down	1.36	0.0352	chr2(-):197001864-197041227	UCSC	serine/threonine kinase 17b	DRAK2	AK312865	9262	ENSG00000081320	10.81	10.37	No
GSHG0002426	---	down	1.36	0.0411	chr1(-):121102017-121139765	UCSC	---	---	AK127439	---	---	8.73	8.29	No
GSHG0016988	HAT1	down	1.36	0.027	chr2(+):172778945-172848599	UCSC	histone acetyltransferase 1	KAT1	BC063003	8520	ENSG00000128708	9.33	8.88	No
GSHG0015808	GMFG	down	1.36	0.0372	chr19(-):39819000-39826679	UCSC	glia maturation factor, gamma	---	BC080180	9535	ENSG00000130755	11.54	11.09	No
GSHG0015112	SIGLEC16	down	1.35	0.0128	chr19(+):50472857-50479069	UCSC	sialic acid binding Ig-like lectin 16 (gene/pseudogene)	SIGLECP16 // Siglec-P16	BC039008	400709	ENSG00000161643	8.21	7.77	Yes
GSHG0014769	ZNF254	down	1.35	0.0106	chr19(+):24216247-24312652	UCSC	zinc finger protein 254	ZNF539 // ZNF91L // BMZF-5 // HD-ZNF1	AK303431	9534	ENSG00000213096	9.54	9.11	No
GSHG0033284	RPL17	down	1.35	0.00518	chr18(-):47014858-47018853	UCSC	ribosomal protein L17	L17 // rpL23	AK304659	6139	ENSG00000215472	10.8	10.37	No
GSHG0012807	ICT1	down	1.35	0.029	chr17(+):73008769-73017360	UCSC	immature colon carcinoma transcript 1	DS-1	AK222553	3396	ENSG00000167862	8.42	7.99	No
GSHG0012477	CDC6	down	1.35	0.0219	chr17(+):38444131-38459220	UCSC	cell division cycle 6 homolog (S. cerevisiae)	CDC18L	BC025232	990	ENSG00000094804	8.56	8.13	No
GSHG0009988	ARIH1	down	1.35	0.0342	chr15(+):72766667-72877867	UCSC	ariadne homolog, ubiquitin-conjugating enzyme E2 binding protein, 1 (Drosophila)	ARI // HARI // HHARI // UBCH7BP	AB209432	25820	ENSG00000166233	9.75	9.31	No
GSHG0009799	RTF1	down	1.35	0.0119	chr15(+):41709330-41775178	UCSC	Rtf1, Paf1/RNA polymerase II complex component, homolog (S. cerevisiae)	KIAA0252	D87440	23168	ENSG00000137815	9.04	8.6	No
GSHG0001486	SRP9	down	1.35	0.0213	chr1(+):225965528-225978167	UCSC	signal recognition particle 9kDa	---	BC066957	6726	ENSG00000143742	10.55	10.12	No
GSHG0007778	PPTC7	down	1.35	0.0358	chr12(-):110971052-111021123	UCSC	PTC7 protein phosphatase homolog (S. cerevisiae)	TA-PP2C	AK124744	160760	ENSG00000196850	8.61	8.18	Yes
GSHG0007456	LIMA1	down	1.35	0.0403	chr12(-):50569571-50677290	UCSC	LIM domain and actin binding 1	EPLIN	BC110815	51474	ENSG00000050405	7.03	6.6	No
GSHG0005665	---	down	1.35	0.0178	chr11(-):27911648-27912921	UCSC	---	---	M30627	---	---	10.45	10.02	Yes
GSHG0004664	NUCB2	down	1.35	0.0119	chr11(+):17281887-17371521	UCSC	nucleobindin 2	NEFA	AK097398	4925	ENSG00000070081	10.7	10.27	No
GSHG0004271	---	down	1.35	0.0286	chr10(-):97820401-97823487	UCSC	---	---	AK000974	---	---	6.51	6.08	No
GSHG0003872	PHYH	down	1.35	0.0127	chr10(-):13319800-13342101	UCSC	phytanoyl-CoA 2-hydroxylase	PAHX // PHYH1 // RD	AF112977	5264	ENSG00000107537	6.87	6.44	No
GSHG0003752	BUB3	down	1.35	0.0261	chr10(+):124913883-124924879	UCSC	budding uninhibited by benzimidazoles 3 homolog (yeast)	BUB3L	BX647392	9184	ENSG00000154473	10.07	9.63	No
GSHG0003710	FAM160B1	down	1.35	0.0407	chr10(+):116581503-116659585	UCSC	family with sequence similarity 160, member B1	KIAA1600 // bA106M7.3	BC037207	57700	ENSG00000151553	9.14	8.71	No
GSHG0033009	TTTY3	down	1.35	0.0144	chrY(+):27874637-27879535	UCSC	testis-specific transcript, Y-linked 3 (non-protein coding)	LINC00121 // TTTY3A // TTY3	AF332230	114760	ENSG00000231141	6.38	5.96	No
GSHG0030319	INVS	down	1.35	0.00734	chr9(+):102861511-103069748	UCSC	inversin	NPHP2	BC110864	27130	ENSG00000119509	8.42	7.99	No
GSHG0029137	OTUD6B	down	1.35	0.037	chr8(+):92082543-92099319	UCSC	OTU domain containing 6B	CGI-77 // DUBA5	BX647772	51633	ENSG00000155100	8.86	8.43	No
GSHG0028978	POLB	down	1.35	0.0191	chr8(+):42195973-42229326	UCSC	polymerase (DNA directed), beta	---	AK223537	5423	ENSG00000070501	8.12	7.69	No
GSHG0026392	---	down	1.35	0.00252	chr6(-):27356047-27357004	UCSC	---	---	BC029571	---	---	8	7.56	No
GSHG0033456	---	down	1.35	0.000899	chr6(-):5108654-5260975	UCSC	---	---	BC067762	---	---	7.81	7.37	No
GSHG0026065	HEBP2	down	1.35	0.00906	chr6(+):138725356-138734582	UCSC	heme binding protein 2	C6orf34 // SOUL	AK057928	23593	ENSG00000051620	9.86	9.42	No
GSHG0024882	WDR41	down	1.35	0.0097	chr5(-):76728061-76788320	UCSC	WD repeat domain 41	FLJ10904	AK001766	55255	ENSG00000164253	7.39	6.96	No
GSHG0023338	NUP54	down	1.35	0.0109	chr4(-):77035813-77069655	UCSC	nucleoporin 54kDa	---	BX538002	53371	ENSG00000138750	8.04	7.6	No
GSHG0022647	MOB1B	down	1.35	0.0413	chr4(+):71768064-71853883	UCSC	MOB kinase activator 1B	MOBKL1A // MOB4A	BC038112	92597	ENSG00000173542	9.15	8.71	No
GSHG0022140	HLTF	down	1.35	0.0199	chr3(-):148747914-148804341	UCSC	helicase-like transcription factor	SMARCA3 // SNF2L3 // HIP116A // HLTF1 // RNF80	Z46606	6596	ENSG00000071794	8.6	8.16	No
GSHG0021998	---	down	1.35	0.0381	chr3(-):123329584-123330850	UCSC	---	---	BC033713	---	---	5.82	5.39	Yes
GSHG0021703	PRKAR2A	down	1.35	0.028	chr3(-):48785218-48885261	UCSC	protein kinase, cAMP-dependent, regulatory, type II, alpha	PRKAR2	AK293042	5576	ENSG00000114302	7.02	6.59	No
GSHG0021470	RPL35A	down	1.35	0.0207	chr3(+):197677052-197682719	UCSC	ribosomal protein L35a	L35A	BC017093	6165	ENSG00000182899	12.17	11.73	No
GSHG0020415	SLC25A17	down	1.35	0.0454	chr22(-):41165641-41215373	UCSC	solute carrier family 25 (mitochondrial carrier; peroxisomal membrane protein, 34kDa), member 17	PMP34	BC024741	10478	ENSG00000100372	7.62	7.19	No
GSHG0019613	LTN1	down	1.35	0.0338	chr21(-):30300474-30365270	UCSC	listerin E3 ubiquitin protein ligase 1	C21orf10 // C21orf98 // RNF160 // ZNF294 // FLJ11053 // KIAA0714 // LISTERIN	BC150284	26046	ENSG00000198862	8.07	7.64	No
GSHG0019125	EIF2S2	down	1.35	0.0256	chr20(-):32677238-32700052	UCSC	eukaryotic translation initiation factor 2, subunit 2 beta, 38kDa	EIF2 // EIF2beta // PPP1R67	M29536	8894	ENSG00000125977	9.05	8.61	No
GSHG0018715	C20orf4	down	1.35	0.00586	chr20(+):34824399-34844853	UCSC	chromosome 20 open reading frame 4	bA234K24.2	AL117419	25980	ENSG00000131043	8.63	8.2	No
GSHG0017546	STRN	down	1.35	0.0344	chr2(-):37075473-37193615	UCSC	striatin, calmodulin binding protein	SG2NA	AJ223814	6801	ENSG00000115808	8.74	8.31	No
GSHG0017241	MRPL44	down	1.35	0.0402	chr2(+):224822172-224832424	UCSC	mitochondrial ribosomal protein L44	FLJ12701 // FLJ13990	AK022763	65080	ENSG00000135900	7.75	7.32	No
GSHG0015621	RAB3A	down	1.34	0.0057	chr19(-):18307611-18314852	UCSC	RAB3A, member RAS oncogene family	---	BC011782	5864	ENSG00000105649	7.73	7.31	No
GSHG0015286	---	down	1.34	0.0332	chr19(+):59002493-59004180	UCSC	---	---	AK054778	---	---	7.8	7.38	No
GSHG0014466	HMG20B	down	1.34	0.0454	chr19(+):3572953-3579081	UCSC	high mobility group 20B	BRAF25 // BRAF35 // HMGX2 // HMGXB2 // SMARCE1r // SOXL	BC002552	10362	ENSG00000064961	9.04	8.62	No
GSHG0014450	GADD45B	down	1.34	0.00812	chr19(+):2476125-2478257	UCSC	growth arrest and DNA-damage-inducible, beta	MYD118 // DKFZP566B133 // GADD45BETA	AF087853	4616	ENSG00000099860	7.74	7.32	No
GSHG0033305	CSH1	down	1.34	0.0262	chr17(-):61972274-61973939	UCSC	chorionic somatomammotropin hormone 1 (placental lactogen)	CSA // CSMT // FLJ75407 // hCS-A // PL	BC062775	1442	ENSG00000136488	8.29	7.86	No
GSHG0012767	PRKAR1A	down	1.34	0.0393	chr17(+):66508141-66528900	UCSC	protein kinase, cAMP-dependent, regulatory, type I, alpha (tissue specific extinguisher 1)	PRKAR1 // TSE1	BC093042	5573	ENSG00000108946	8.98	8.56	Yes
GSHG0009925	USP3	down	1.34	0.0343	chr15(+):63796791-63886838	UCSC	ubiquitin specific peptidase 3	---	BX647760	9960	ENSG00000140455	9.7	9.28	Yes
GSHG0008004	CDK8	down	1.34	0.0476	chr13(+):26828241-26979371	UCSC	cyclin-dependent kinase 8	K35	BC094784	1024	ENSG00000132964	7.58	7.16	Yes
GSHG0006563	---	down	1.34	0.0327	chr12(+):28732270-28734444	UCSC	---	---	AK092571	---	---	6.33	5.92	Yes
GSHG0006427	TPI1	down	1.34	0.0347	chr12(+):6976358-6980861	UCSC	triosephosphate isomerase 1	---	DQ896578	7167	ENSG00000111669	10.8	10.38	No
GSHG0005373	EI24	down	1.34	0.0272	chr11(+):125439326-125454124	UCSC	etoposide induced 2.4 mRNA	EPG4 // PIG8 // TP53I8	AB209820	9538	ENSG00000149547	9.48	9.06	No
GSHG0005124	C11orf30	down	1.34	0.0181	chr11(+):76156069-76263940	UCSC	chromosome 11 open reading frame 30	EMSY	AK304043	56946	ENSG00000158636	9.27	8.86	No
GSHG0004026	C10orf25	down	1.34	0.0299	chr10(-):45489381-45497023	UCSC	chromosome 10 open reading frame 25	FLJ30567	BC062568	220979	ENSG00000165511	7.37	6.95	No
GSHG0032198	ITM2A	down	1.34	0.0172	chrX(-):78615883-78623007	UCSC	integral membrane protein 2A	BRICD2A // E25A	BC034485	9452	ENSG00000078596	10.53	10.1	No
GSHG0032164	RPS4X	down	1.34	0.00324	chrX(-):71492454-71498744	UCSC	ribosomal protein S4, X-linked	CCG2 // DXS306 // FLJ40595 // RPS4 // S4 // SCAR // SCR10	DQ894924	6191	ENSG00000198034	11.3	10.88	No
GSHG0032080	TIMM17B	down	1.34	0.048	chrX(-):48750732-48755426	UCSC	translocase of inner mitochondrial membrane 17 homolog B (yeast)	DXS9822 // JM3	AF034790	10245	ENSG00000126768	8.27	7.85	Yes
GSHG0033096	UBE2NL	down	1.34	0.0318	chrX(+):142967173-142968362	UCSC	ubiquitin-conjugating enzyme E2N-like	---	GU727624	389898	ENSG00000102069	8.87	8.45	Yes
GSHG0031834	SLC9A6	down	1.34	0.018	chrX(+):135067592-135129419	UCSC	solute carrier family 9 (sodium/hydrogen exchanger), member 6	KIAA0267 // NHE6	BC035029	10479	ENSG00000198689	8.56	8.13	No
GSHG0031820	HPRT1	down	1.34	0.0136	chrX(+):133594195-133634696	UCSC	hypoxanthine phosphoribosyltransferase 1	HPRT // HGPRT	M31642	3251	ENSG00000165704	8.18	7.75	No
GSHG0030487	SET	down	1.34	0.0348	chr9(+):131446075-131458667	UCSC	SET nuclear oncogene	2PP2A // IPP2A2 // PHAPII	D45198	6418	ENSG00000119335	11.38	10.95	No
GSHG0030449	PBX3	down	1.34	0.0216	chr9(+):128509617-128729653	UCSC	pre-B-cell leukemia homeobox 3	---	BC094883	5090	ENSG00000167081	8.05	7.63	No
GSHG0029686	ZFAND1	down	1.34	0.0302	chr8(-):82613569-82633535	UCSC	zinc finger, AN1-type domain 1	FLJ14007	AK225195	79752	ENSG00000104231	7.22	6.8	No
GSHG0029075	---	down	1.34	0.0291	chr8(+):71520812-71575505	UCSC	---	---	AL833348	---	---	5.88	5.46	Yes
GSHG0027931	DNAJB6	down	1.34	0.0472	chr7(+):157129698-157210132	UCSC	DnaJ (Hsp40) homolog, subfamily B, member 6	MRJ	AK223601	10049	ENSG00000105993	10.06	9.64	No
GSHG0027212	C7orf46	down	1.34	0.0142	chr7(+):23719751-23742268	UCSC	chromosome 7 open reading frame 46	DKFZp686F0810 // FLJ45875 // MGC72075	BC042034	340277	ENSG00000188732	7.37	6.95	No
GSHG0026268	ECI2	down	1.34	0.00654	chr6(-):4115936-4135824	UCSC	enoyl-CoA delta isomerase 2	PECI // ACBD2 // DRS1 // HCA88	AK057175	10455	ENSG00000198721	8.12	7.7	No
GSHG0025965	AMD1	down	1.34	0.0359	chr6(+):111135824-111216915	UCSC	adenosylmethionine decarboxylase 1	SAMDC	AK304351	262	ENSG00000123505	8.69	8.27	No
GSHG0003227	---	down	1.34	0.0209	chr10(+):18098352-18200090	UCSC	---	---	J05550	---	---	6.41	5.99	Yes
GSHG0025063	C5orf15	down	1.34	0.00426	chr5(-):133291202-133304478	UCSC	chromosome 5 open reading frame 15	HTGN29 // KCT2	AF226055	56951	ENSG00000113583	8.35	7.93	Yes
GSHG0024343	POU4F3	down	1.34	0.0426	chr5(+):145718587-145720083	UCSC	POU class 4 homeobox 3	DFNA15 // BRN3C	BC112207	5459	ENSG00000091010	6.58	6.16	No
GSHG0023619	NAF1	down	1.34	0.0381	chr4(-):164047860-164088073	UCSC	nuclear assembly factor 1 homolog (S. cerevisiae)	---	AK308601	92345	ENSG00000145414	7.49	7.06	No
GSHG0022779	RPL34	down	1.34	0.00126	chr4(+):109541722-109551566	UCSC	ribosomal protein L34	L34	BC001773	6164	ENSG00000109475	12.14	11.72	No
GSHG0021596	CMTM6	down	1.34	0.018	chr3(-):32522804-32544846	UCSC	CKLF-like MARVEL transmembrane domain containing 6	CKLFSF6 // FLJ20396	AF479261	54918	ENSG00000091317	8.29	7.86	No
GSHG0020453	TTLL1	down	1.34	0.0225	chr22(-):43425356-43485434	UCSC	tubulin tyrosine ligase-like family, member 1	C22orf7	AL136687	25809	ENSG00000100271	8.45	8.03	No
GSHG0020416	---	down	1.34	0.0233	chr22(-):41220603-41252652	UCSC	---	---	BC052982	---	---	9.76	9.34	No
GSHG0019409	SOD1	down	1.34	0.0407	chr21(+):33032004-33041236	UCSC	superoxide dismutase 1, soluble	ALS // ALS1 // IPOA	X02317	6647	ENSG00000142168	8.8	8.38	No
GSHG0018659	TPX2	down	1.34	0.0449	chr20(+):30327121-30389603	UCSC	TPX2, microtubule-associated, homolog (Xenopus laevis)	C20orf1 // C20orf2 // DIL-2 // p100	BC020207	22974	ENSG00000088325	10.36	9.94	No
GSHG0016888	UBXN4	down	1.34	0.0311	chr2(+):136499196-136542625	UCSC	UBX domain protein 4	UBXD2 // UBXDC1 // KIAA0242	BC035594	23190	ENSG00000144224	9.53	9.11	No
GSHG0015857	GSK3A	down	1.34	0.0416	chr19(-):42734338-42746745	UCSC	glycogen synthase kinase 3 alpha	---	BC027984	2931	ENSG00000105723	10.11	9.68	No
GSHG0014879	ZNF570	down	1.33	0.0243	chr19(+):37958674-37976260	UCSC	zinc finger protein 570	FLJ30791	AK308252	148268	ENSG00000171827	8.12	7.71	No
GSHG0002171	SERBP1	down	1.33	0.0444	chr1(-):67876721-67896098	UCSC	SERPINE1 mRNA binding protein 1	CGI-55 // CHD3IP // DKFZP564M2423 // HABP4L // PAI-RBP1 // PAIRBP1	BX647139	26135	ENSG00000142864	10.81	10.4	Yes
GSHG0011783	BCL7C	down	1.33	0.0304	chr16(-):30845373-30905623	UCSC	B-cell CLL/lymphoma 7C	---	BC058863	9274	ENSG00000099385	7.72	7.31	No
GSHG0033247	RPS17	down	1.33	2.02e-05	chr15(-):82821162-82824851	UCSC	ribosomal protein S17	MGC72007 // RPS17L1 // RPS17L2 // S17	BC071928	6218	ENSG00000184779	11.33	10.92	Yes
GSHG0010576	---	down	1.33	0.011	chr15(-):74209937-74220589	UCSC	---	---	AK056376	---	---	7.61	7.2	No
GSHG0008996	EIF2B2	down	1.33	0.047	chr14(+):75469614-75476292	UCSC	eukaryotic translation initiation factor 2B, subunit 2 beta, 39kDa	EIF-2Bbeta // EIF2B	BC003165	8892	ENSG00000119718	8.56	8.15	No
GSHG0006600	ARID2	down	1.33	0.00796	chr12(+):46076512-46331951	UCSC	AT rich interactive domain 2 (ARID, RFX-like)	BAF200 // DKFZp686G052 // FLJ30619 // KIAA1557	AK127872	196528	ENSG00000189079	9.52	9.11	No
GSHG0006142	CARD16	down	1.33	0.0261	chr11(-):104912053-104916103	UCSC	caspase recruitment domain family, member 16	COP // COP1 // PSEUDO-ICE	AY885669	114769	ENSG00000204397	6.7	6.29	Yes
GSHG0004628	ZNF143	down	1.33	0.0463	chr11(+):9482523-9549611	UCSC	zinc finger protein 143	pHZ-1 // SBF // STAF	BC014458	7702	ENSG00000166478	7.9	7.5	No
GSHG0004268	TCTN3	down	1.33	0.0358	chr10(-):97423160-97454712	UCSC	tectonic family member 3	C10orf61 // DKFZP564D116 // TECT3	AK128834	26123	ENSG00000119977	8.11	7.71	No
GSHG0004021	ZNF32	down	1.33	0.00604	chr10(-):44139308-44144333	UCSC	zinc finger protein 32	KOX30	U69645	7580	ENSG00000169740	7.66	7.25	No
GSHG0032137	---	down	1.33	0.0152	chrX(-):62646439-62780929	UCSC	---	---	AL080202	---	---	8.85	8.45	No
GSHG0031968	---	down	1.33	0.0371	chrX(-):10865996-11129260	UCSC	---	---	AY660579	---	---	7.9	7.49	No
GSHG0031807	UTP14A	down	1.33	0.007	chrX(+):129040128-129063727	UCSC	UTP14, U3 small nucleolar ribonucleoprotein, homolog A (yeast)	SDCCAG16 // NY-CO-16	AK298578	10813	ENSG00000156697	7.45	7.03	No
GSHG0031073	PTBP3	down	1.33	0.0465	chr9(-):114980903-115095910	UCSC	polypyrimidine tract binding protein 3	ROD1 // DKFZp781I1117	CR749471	9991	ENSG00000119314	10.79	10.39	No
GSHG0030123	GRHPR	down	1.33	0.0196	chr9(+):37422663-37436989	UCSC	glyoxylate reductase/hydroxypyruvate reductase	GLXR // PH2	AK025978	9380	ENSG00000137106	8.8	8.39	No
GSHG0003442	---	down	1.33	0.047	chr10(+):74094165-74098315	UCSC	---	---	AK311579	---	---	7.69	7.28	No
GSHG0029012	MRPL15	down	1.33	0.0402	chr8(+):55047781-55060458	UCSC	mitochondrial ribosomal protein L15	HSPC145 // L15mt // MRP-L15 // MRP-L7 // RPML7	BC000891	29088	ENSG00000137547	7.46	7.05	No
GSHG0003403	REEP3	down	1.33	0.0261	chr10(+):65281123-65381971	UCSC	receptor accessory protein 3	C10orf74	BC068557	221035	ENSG00000165476	7.75	7.34	No
GSHG0028270	ABHD11	down	1.33	0.0145	chr7(-):73150427-73153188	UCSC	abhydrolase domain containing 11	WBSCR21 // PP1226	AY053499	83451	ENSG00000106077	7.73	7.33	No
GSHG0027803	---	down	1.33	0.0127	chr7(+):142418746-142422829	UCSC	---	---	AK125822	---	---	6.47	6.06	No
GSHG0026106	TAB2	down	1.33	0.0167	chr6(+):149539777-149732747	UCSC	TGF-beta activated kinase 1/MAP3K7 binding protein 2	MAP3K7IP2 // KIAA0733	AK295750	23118	ENSG00000055208	10.61	10.19	No
GSHG0025488	HIST1H3C	down	1.33	0.0439	chr6(+):26045608-26047022	UCSC	histone cluster 1, H3c	H3FC // H3.1 // H3/c	BC058834	8352	ENSG00000196532	10.5	10.09	No
GSHG0025066	SKP1	down	1.33	0.0143	chr5(-):133492569-133512659	UCSC	S-phase kinase-associated protein 1	SKP1A // EMC19 // MGC34403 // OCP-II // OCP2 // p19A // TCEB1L	Z47087	6500	ENSG00000113558	9.72	9.3	Yes
GSHG0024975	ST8SIA4	down	1.33	0.015	chr5(-):100145360-100238970	UCSC	ST8 alpha-N-acetyl-neuraminide alpha-2,8-sialyltransferase 4	SIAT8D // PST // PST1	BC053657	7903	ENSG00000113532	9.74	9.33	No
GSHG0023370	SEC31A	down	1.33	0.0449	chr4(-):83739815-83821700	UCSC	SEC31 homolog A (S. cerevisiae)	SEC31L1 // ABP125 // ABP130 // KIAA0905	AB020712	22872	ENSG00000138674	9.79	9.37	No
GSHG0023251	SCFD2	down	1.33	0.0234	chr4(-):53739153-54232242	UCSC	sec1 family domain containing 2	FLJ39514 // STXBP1L1	AY299407	152579	ENSG00000184178	8.16	7.75	No
GSHG0022155	GPR171	down	1.33	0.0013	chr3(-):150915628-150920979	UCSC	G protein-coupled receptor 171	H963	BC036815	29909	ENSG00000174946	6.11	5.7	Yes
GSHG0020876	SLMAP	down	1.33	0.0147	chr3(+):57743028-57914894	UCSC	sarcolemma associated protein	KIAA1601 // SLAP	BC115701	7871	ENSG00000163681	7.98	7.57	No
GSHG0002737	VAMP4	down	1.33	0.0497	chr1(-):171669298-171711214	UCSC	vesicle-associated membrane protein 4	---	BC031264	8674	ENSG00000117533	7.94	7.54	No
GSHG0018792	ZSWIM1	down	1.33	0.0034	chr20(+):44509860-44513904	UCSC	zinc finger, SWIM-type containing 1	C20orf162 // dJ337O18.5	BC080525	90204	ENSG00000168612	8.68	8.27	No
GSHG0002561	C1orf43	down	1.33	0.0408	chr1(-):154179183-154193107	UCSC	chromosome 1 open reading frame 43	DKFZp586G1722 // NICE-3	AF077036	25912	ENSG00000143612	9.69	9.28	No
GSHG0016065	ZNF649	down	1.33	0.0268	chr19(-):52392483-52408270	UCSC	zinc finger protein 649	FLJ12644	AL713677	65251	ENSG00000198093	8.37	7.96	No
GSHG0002297	LRRC39	down	1.32	0.0325	chr1(-):100614402-100643801	UCSC	leucine rich repeat containing 39	MGC14816	BC022420	127495	ENSG00000122477	6.1	5.69	No
GSHG0015404	FUT5 // NDUFA11	down	1.32	0.0333	chr19(-):5865082-5903799	UCSC	fucosyltransferase 5 (alpha (1,3) fucosyltransferase) // NADH dehydrogenase (ubiquinone) 1 alpha subcomplex, 11, 14.7kDa	B14.7 // FUC-TV	AK291087	126328 // 2527	ENSG00000130383 // ENSG00000174886	8.6	8.2	No
GSHG0015018	FOSB	down	1.32	0.0468	chr19(+):45971253-45978436	UCSC	FBJ murine osteosarcoma viral oncogene homolog B	AP-1 // DKFZp686C0818 // G0S3 // GOS3 // GOSB // MGC42291	L49169	2354	ENSG00000125740	7.68	7.28	No
GSHG0014204	FAM210A	down	1.32	0.0324	chr18(-):13665745-13726591	UCSC	family with sequence similarity 210, member A	C18orf19 // HsT2329 // MGC24180	AK055618	125228	ENSG00000177150	7.27	6.87	No
GSHG0012518	VPS25	down	1.32	0.0353	chr17(+):40925454-40931616	UCSC	vacuolar protein sorting 25 homolog (S. cerevisiae)	DERP9 // EAP20 // MGC10540	BC006282	84313	ENSG00000131475	8.22	7.82	No
GSHG0011713	NDUFAB1	down	1.32	0.0287	chr16(-):23592335-23607635	UCSC	NADH dehydrogenase (ubiquinone) 1, alpha/beta subcomplex, 1, 8kDa	ACP // FASN2A // SDAP	AF087660	4706	ENSG00000004779	7.61	7.21	No
GSHG0011299	NFATC3	down	1.32	0.0127	chr16(+):68118654-68260802	UCSC	nuclear factor of activated T-cells, cytoplasmic, calcineurin-dependent 3	NFAT4 // NFATX	EU887608	4775	ENSG00000072736	11.22	10.81	No
GSHG0009069	C14orf109	down	1.32	0.0262	chr14(+):93651329-93653429	UCSC	chromosome 14 open reading frame 109	DKFZP564F1123	BC030119	26175	ENSG00000153485	6.25	5.85	No
GSHG0008825	ATP5S	down	1.32	0.0299	chr14(+):50779047-50802276	UCSC	ATP synthase, H+ transporting, mitochondrial Fo complex, subunit s (factor B)	ATPW // HSU79253	AF390029	27109	ENSG00000125375	8.4	7.99	Yes
GSHG0008473	LCP1	down	1.32	0.0249	chr13(-):46700059-46756402	UCSC	lymphocyte cytosolic protein 1 (L-plastin)	CP64 // L-PLASTIN // LC64P // PLS2	BC010271	3936	ENSG00000136167	11.41	11.01	No
GSHG0008446	ELF1	down	1.32	0.0397	chr13(-):41506056-41635077	UCSC	E74-like factor 1 (ets domain transcription factor)	---	BX640798	1997	ENSG00000120690	10.73	10.33	No
GSHG0007453	RACGAP1	down	1.32	0.0216	chr12(-):50382945-50419277	UCSC	Rac GTPase activating protein 1	MgcRacGAP	AL136794	29127	ENSG00000161800	9.75	9.35	Yes
GSHG0001119	ATF6	down	1.32	0.0372	chr1(+):161736082-161928876	UCSC	activating transcription factor 6	ATF6A	AB015856	22926	ENSG00000118217	9.81	9.41	No
GSHG0031826	ZNF449	down	1.32	0.0241	chrX(+):134477628-134497338	UCSC	zinc finger protein 449	FLJ23614 // ZSCAN19	AY280801	203523	ENSG00000173275	6.8	6.4	No
GSHG0031801	SH2D1A	down	1.32	0.0408	chrX(+):123480194-123507240	UCSC	SH2 domain containing 1A	IMD5 // LYP // DSHP // EBVS // MTCP1 // SAP // XLP // XLPD	AF072930	4068	ENSG00000183918	10.33	9.93	No
GSHG0031506	RBM3	down	1.32	0.0143	chrX(+):48432872-48436673	UCSC	RNA binding motif (RNP1, RRM) protein 3	IS1-RNPL	AK000859	5935	ENSG00000102317	10.18	9.78	No
GSHG0031373	HCCS	down	1.32	0.0243	chrX(+):11129421-11141201	UCSC	holocytochrome c synthase	CCHL	AK097815	3052	ENSG00000004961	7.61	7.2	No
GSHG0028923	LEPROTL1	down	1.32	0.013	chr8(+):29952939-29965587	UCSC	leptin receptor overlapping transcript-like 1	my047 // Vps55	AY358674	23484	ENSG00000104660	9.4	9	No
GSHG0028595	---	down	1.32	0.0365	chr7(-):132140889-132142696	UCSC	---	---	AK096008	---	---	7.63	7.24	No
GSHG0022343	PPP1R2	down	1.32	0.00162	chr3(-):195241223-195270209	UCSC	protein phosphatase 1, regulatory (inhibitor) subunit 2	IPP2	BC007655	5504	ENSG00000184203	9.1	8.69	No
GSHG0022221	LRRC34	down	1.32	0.0256	chr3(-):169511216-169530479	UCSC	leucine rich repeat containing 34	MGC27085	AK293661	151827	ENSG00000171757	7.47	7.07	No
GSHG0019709	HMGN1	down	1.32	0.0154	chr21(-):40714232-40721056	UCSC	high mobility group nucleosome binding domain 1	HMG14 // FLJ27265 // FLJ31471 // MGC104230 // MGC117425	BC107741	3150	ENSG00000205581	11.22	10.82	No
GSHG0018950	NSFL1C	down	1.32	0.0304	chr20(-):1422815-1448337	UCSC	NSFL1 (p97) cofactor (p47)	dJ776F14.1 // p47 // UBX1 // UBXD10 // UBXN2C	AK001511	55968	ENSG00000088833	9.04	8.64	No
GSHG0015771	ZNF585B	down	1.32	0.0348	chr19(-):37675724-37701454	UCSC	zinc finger protein 585B	FLJ14928 // SZFP41	AY147015	92285	ENSG00000245680	7.43	7.03	No
GSHG0015129	SIGLEC9	down	1.31	0.0499	chr19(+):51628165-51639520	UCSC	sialic acid binding Ig-like lectin 9	CD329	AK297043	27180	ENSG00000129450	7.37	6.99	Yes
GSHG0014790	C19orf40	down	1.31	0.0349	chr19(+):33463139-33470054	UCSC	chromosome 19 open reading frame 40	FAAP24 // FLJ46828 // MGC32020	AK128668	91442	ENSG00000131944	7.4	7.01	No
GSHG0014629	C19orf53	down	1.31	0.0399	chr19(+):13885284-13889275	UCSC	chromosome 19 open reading frame 53	HSPC023 // LYDG10	AF086483	28974	ENSG00000104979	10.85	10.46	Yes
GSHG0013270	SLFN11	down	1.31	0.0497	chr17(-):33677331-33700644	UCSC	schlafen family member 11	FLJ34922	AL831964	91607	ENSG00000172716	10.08	9.69	No
GSHG0001975	MRPS15	down	1.31	0.0312	chr1(-):36921360-36929984	UCSC	mitochondrial ribosomal protein S15	FLJ11564	AF265439	64960	ENSG00000116898	9.83	9.44	No
GSHG0012705	PPM1D	down	1.31	0.0419	chr17(+):58677544-58741847	UCSC	protein phosphatase, Mg2+/Mn2+ dependent, 1D	PP2C-DELTA // Wip1	BC060877	8493	ENSG00000170836	9.39	9	No
GSHG0009210	NDRG2	down	1.31	0.0336	chr14(-):21484923-21539031	UCSC	NDRG family member 2	KIAA1248 // SYLD	AK293514	57447	ENSG00000165795	6.86	6.48	No
GSHG0008981	PTGR2 // ZNF410	down	1.31	0.0296	chr14(+):74318548-74398981	UCSC	prostaglandin reductase 2 // zinc finger protein 410	ZADH1 // APA-1 // APA1 // FLJ39091	BC034973	145482 // 57862	ENSG00000119725 // ENSG00000140043	8.04	7.65	No
GSHG0006949	HSP90B1	down	1.31	0.0496	chr12(+):104324160-104341705	UCSC	heat shock protein 90kDa beta (Grp94), member 1	TRA1 // GP96 // GRP94	AK025459	7184	ENSG00000166598	10.64	10.25	Yes
GSHG0006485	ETV6	down	1.31	0.0384	chr12(+):11802788-12044552	UCSC	ets variant 6	TEL	BC043399	2120	ENSG00000139083	10.57	10.17	No
GSHG0006037	PAK1	down	1.31	0.0153	chr11(-):77033062-77184977	UCSC	p21 protein (Cdc42/Rac)-activated kinase 1	---	BC050377	5058	ENSG00000149269	8.76	8.37	No
GSHG0005943	PPP1CA	down	1.31	0.045	chr11(-):67165652-67194582	UCSC	protein phosphatase 1, catalytic subunit, alpha isozyme	PPP1A // PP-1A // PP1alpha	AK098311	5499	ENSG00000172531	10.35	9.96	No
GSHG0005749	NUP160	down	1.31	0.0281	chr11(-):47799640-47870057	UCSC	nucleoporin 160kDa	FLJ22583 // KIAA0197	BX647634	23279	ENSG00000030066	8.52	8.13	No
GSHG0005121	---	down	1.31	0.0393	chr11(+):75753283-75755819	UCSC	---	---	AK129802	---	---	5.64	5.26	Yes
GSHG0004746	CAPRIN1	down	1.31	0.0206	chr11(+):34073230-34122055	UCSC	cell cycle associated protein 1	GPIAP1 // M11S1 // caprin-1 // RNG105	BC001731	4076	ENSG00000135387	11.03	10.64	No
GSHG0030967	NINJ1	down	1.31	0.0166	chr9(-):95883772-95896570	UCSC	ninjurin 1	NIN1	BC048212	4814	ENSG00000131669	7.61	7.22	No
GSHG0030365	---	down	1.31	0.0249	chr9(+):114558753-114561048	UCSC	---	---	AK023522	---	---	7.86	7.47	Yes
GSHG0029861	ASAP1	down	1.31	0.0385	chr8(-):131064353-131440048	UCSC	ArfGAP with SH3 domain, ankyrin repeat and PH domain 1	DDEF1 // CENTB4 // KIAA1249 // PAP // ZG14P	BC144493	50807	ENSG00000153317	8.12	7.72	No
GSHG0029580	LYPLA1	down	1.31	0.0244	chr8(-):54958938-55014577	UCSC	lysophospholipase I	LPL1	AF081281	10434	ENSG00000120992	8.53	8.14	No
GSHG0026629	C6orf108	down	1.31	0.0263	chr6(-):43193367-43197219	UCSC	chromosome 6 open reading frame 108	dJ330M21.3 // rcl	EU585603	10591	ENSG00000112667	8.27	7.89	No
GSHG0022198	KPNA4	down	1.31	0.0294	chr3(-):160217956-160283376	UCSC	karyopherin alpha 4 (importin alpha 3)	IPOA3 // MGC12217 // MGC26703 // QIP1 // SRP3	BC034493	3840	ENSG00000186432	8.9	8.51	No
GSHG0021838	C3orf64	down	1.31	0.0424	chr3(-):69024366-69062821	UCSC	chromosome 3 open reading frame 64	AER61 // FLJ33770	BX648818	285203	ENSG00000163378	8.09	7.7	No
GSHG0020857	SPCS1	down	1.31	0.0234	chr3(+):52738850-52742186	UCSC	signal peptidase complex subunit 1 homolog (S. cerevisiae)	HSPC033 // SPC1 // SPC12 // YJR010C-A	AX775785	28972	ENSG00000114902	10.42	10.04	No
GSHG0020166	ATP6V1E1	down	1.31	0.0456	chr22(-):18074936-18111515	UCSC	ATPase, H+ transporting, lysosomal 31kDa, V1 subunit E1	ATP6E // ATP6V1E // ATP6E2 // P31 // Vma4	AK315941	529	ENSG00000131100	8.24	7.85	No
GSHG0018938	---	down	1.31	0.0276	chr20(-):459114-524392	UCSC	---	---	DQ354583	---	---	9.99	9.6	Yes
GSHG0018711	ROMO1	down	1.31	0.0169	chr20(+):34287327-34288901	UCSC	reactive oxygen species modulator 1	C20orf52 // bA353C18.2 // MTGMP	AK000548	140823	ENSG00000125995	8.26	7.88	No
GSHG0018448	---	down	1.31	0.0161	chr2(-):239755218-239756172	UCSC	---	---	BC143627	---	---	8.89	8.5	No
GSHG0018219	SLC40A1	down	1.31	0.0427	chr2(-):190425316-190448484	UCSC	solute carrier family 40 (iron-regulated transporter), member 1	SLC11A3 // FPN1 // HFE4 // IREG1 // MTP1	BC037733	30061	ENSG00000138449	8.4	8.02	No
GSHG0018096	RBMS1	down	1.31	0.0495	chr2(-):161130515-161350305	UCSC	RNA binding motif, single stranded interacting protein 1	C2orf12 // DKFZp564H0764 // HCC-4 // MSSP-1 // MSSP-2 // MSSP-3 // SCR2 // YC1	BC018951	5937	ENSG00000153250	9.3	8.92	No
GSHG0017404	CMPK2	down	1.31	0.0268	chr2(-):6980503-7006766	UCSC	cytidine monophosphate (UMP-CMP) kinase 2, mitochondrial	TYKi // UMP-CMPK2	AK127983	129607	ENSG00000134326	9.42	9.03	No
GSHG0016720	MAP4K4	down	1.31	0.0144	chr2(+):102314206-102508449	UCSC	mitogen-activated protein kinase kinase kinase kinase 4	FLH21957 // HGK // NIK	BC064691	9448	ENSG00000071054	8.87	8.49	No
GSHG0016482	---	down	1.31	0.013	chr2(+):59444843-59506535	UCSC	---	---	AK056269	---	---	6.27	5.88	No
GSHG0016072	ZNF616	down	1.31	0.0383	chr19(-):52617657-52643179	UCSC	zinc finger protein 616	MGC45556	AX747442	90317	ENSG00000204611	6.93	6.54	No
GSHG0015701	UQCRFS1	down	1.31	0.02	chr19(-):29698241-29704062	UCSC	ubiquinol-cytochrome c reductase, Rieske iron-sulfur polypeptide 1	RIP1 // RIS1 // RISP // UQCR5	BC010035	7386	ENSG00000169021	8.05	7.66	No
GSHG0002255	ZNF644	down	1.3	0.0141	chr1(-):91380859-91487770	UCSC	zinc finger protein 644	BM-005 // KIAA1221 // MGC60165 // MGC70410	BC150177	84146	ENSG00000122482	8.93	8.55	Yes
GSHG0033322	RPL13A	down	1.3	0.00048	chr19(+):49990861-49995562	UCSC	ribosomal protein L13a	TSTA1 // L13A	AK130605	23521	ENSG00000142541	12.82	12.44	No
GSHG0013216	SPAG5	down	1.3	0.0157	chr17(-):26782770-26941215	UCSC	sperm associated antigen 5	DEEPEST // hMAP126 // MAP126	BC045622	10615	ENSG00000076382	8.85	8.47	No
GSHG0013027	DERL2	down	1.3	0.0289	chr17(-):5377610-5389498	UCSC	Der1-like domain family, member 2	CGI-101 // derlin-2 // F-LAN-1 // F-LANa // FLANa	BC010890	51009	ENSG00000072849	8.67	8.29	Yes
GSHG0011214	MT1JP	down	1.3	0.0282	chr16(+):56669651-56670998	UCSC	metallothionein 1J, pseudogene	MT1 // MT1J // MT1NP // MTB	AF348994	4498	ENSG00000255986	8.32	7.94	No
GSHG0009402	C14orf149	down	1.3	0.00192	chr14(-):59939406-59951126	UCSC	chromosome 14 open reading frame 149	FLJ25436	AK058165	112849	ENSG00000126790	7.28	6.9	No
GSHG0009097	PAPOLA	down	1.3	0.0191	chr14(+):96968718-97033430	UCSC	poly(A) polymerase alpha	PAP	BC036014	10914	ENSG00000090060	11.03	10.65	No
GSHG0008990	ISCA2	down	1.3	0.0325	chr14(+):74960450-74962271	UCSC	iron-sulfur cluster assembly 2 homolog (S. cerevisiae)	HBLD1 // ISA2	BX248252	122961	ENSG00000165898	8.14	7.76	No
GSHG0008464	NUFIP1	down	1.3	0.0291	chr13(-):45513384-45563606	UCSC	nuclear fragile X mental retardation protein interacting protein 1	NUFIP	AF159548	26747	ENSG00000083635	7.33	6.95	No
GSHG0007235	M6PR	down	1.3	0.0424	chr12(-):9092965-9102241	UCSC	mannose-6-phosphate receptor (cation dependent)	---	BC024206	4074	ENSG00000003056	9.45	9.07	No
GSHG0006446	FAM66C	down	1.3	0.0311	chr12(+):8332805-8368747	UCSC	family with sequence similarity 66, member C	---	AK096301	440078	ENSG00000226711	7.35	6.96	No
GSHG0005295	UBE4A	down	1.3	0.0271	chr11(+):118230315-118269924	UCSC	ubiquitination factor E4A	E4 // KIAA0126 // UBOX2 // UFD2	D50916	9354	ENSG00000110344	9.51	9.13	No
GSHG0004450	MKI67	down	1.3	0.0222	chr10(-):129894927-129924470	UCSC	antigen identified by monoclonal antibody Ki-67	---	X65551	4288	ENSG00000148773	10.74	10.37	No
GSHG0003983	EPC1	down	1.3	0.0272	chr10(-):32556681-32667667	UCSC	enhancer of polycomb homolog 1 (Drosophila)	Epl1	AF286905	80314	ENSG00000120616	9.87	9.49	No
GSHG0000517	SCP2	down	1.3	0.0256	chr1(+):53392949-53517282	UCSC	sterol carrier protein 2	---	M75883	6342	ENSG00000116171	8.69	8.31	No
GSHG0032455	RPS4Y1	down	1.3	0.0468	chrY(+):2709638-2734997	UCSC	ribosomal protein S4, Y-linked 1	RPS4Y // MGC119100 // MGC5070 // S4	AK292819	6192	ENSG00000129824	8.97	8.6	No
GSHG0030146	---	down	1.3	0.0236	chr9(+):45441937-45563561	UCSC	---	---	BC006438	---	---	6.25	5.87	Yes
GSHG0025580	PRR3	down	1.3	0.0237	chr6(+):30524663-30531500	UCSC	proline rich 3	CAT56 // Em:AB014077.1 // Em:AB023052.2	U63336	80742	ENSG00000204576	8.65	8.27	No
GSHG0025504	---	down	1.3	0.000482	chr6(+):26272386-26272940	UCSC	---	---	BC079832	---	---	6.23	5.86	No
GSHG0003233	ARL5B	down	1.3	0.0456	chr10(+):18948332-18966940	UCSC	ADP-ribosylation factor-like 5B	ARL8	BC024163	221079	ENSG00000165997	10.47	10.08	No
GSHG0025092	FAM13B	down	1.3	0.0265	chr5(-):137273612-137368779	UCSC	family with sequence similarity 13, member B	C5orf5 // FAM13B1 // ARHGAP49 // KHCHP // N61	AF251038	51306	ENSG00000031003	9.39	9.01	No
GSHG0025064	VDAC1	down	1.3	0.0281	chr5(-):133307565-133443058	UCSC	voltage-dependent anion channel 1	MGC111064 // PORIN	AK122953	7416	ENSG00000213585	9.64	9.26	No
GSHG0023341	SCARB2	down	1.3	0.0408	chr4(-):77082230-77134949	UCSC	scavenger receptor class B, member 2	CD36L2 // HLGP85 // LIMP-2 // LIMPII // SR-BII	D12676	950	ENSG00000138760	6.42	6.04	No
GSHG0021991	KPNA1	down	1.3	0.0217	chr3(-):122144526-122233781	UCSC	karyopherin alpha 1 (importin alpha 5)	IPOA5 // NPI-1 // RCH2 // SRP1	S75295	3836	ENSG00000114030	8.63	8.25	No
GSHG0021462	---	down	1.3	0.024	chr3(+):196669494-196670884	UCSC	---	---	AK123020	---	---	7.65	7.28	No
GSHG0021180	---	down	1.3	0.0324	chr3(+):136471472-136474622	UCSC	---	---	BC033531	---	---	7.15	6.78	No
GSHG0021071	TIMMDC1	down	1.3	0.0442	chr3(+):119217394-119242929	UCSC	translocase of inner mitochondrial membrane domain containing 1	C3orf1 // FLJ22597	AF139077	51300	ENSG00000113845	9.58	9.2	No
GSHG0020186	UFD1L	down	1.3	0.0005	chr22(-):19438145-19466716	UCSC	ubiquitin fusion degradation 1 like (yeast)	UFD1	BX648483	7353	ENSG00000070010	9.2	8.82	No
GSHG0018697	DYNLRB1	down	1.3	0.028	chr20(+):33114068-33128762	UCSC	dynein, light chain, roadblock-type 1	DNCL2A // DNLC2A // ROBLD1	AK026864	83658	ENSG00000125971	9.35	8.97	Yes
GSHG0017081	HSPE1	down	1.3	0.0267	chr2(+):198365047-198368171	UCSC	heat shock 10kDa protein 1 (chaperonin 10)	CPN10 // GROES	BC023518	3336	ENSG00000115541	8.27	7.89	Yes
GSHG0015468	ZNF558	down	1.29	0.0221	chr19(-):8920382-8942975	UCSC	zinc finger protein 558	FLJ30932	AK291265	148156	ENSG00000167785	7.4	7.03	Yes
GSHG0014987	ZNF233	down	1.29	0.0247	chr19(+):44764033-44779468	UCSC	zinc finger protein 233	FLJ38032	AK055310	353355	ENSG00000159915	6.42	6.05	No
GSHG0014745	ZNF85	down	1.29	0.0091	chr19(+):21106082-21133501	UCSC	zinc finger protein 85	HPF4 // HTF1	U35376	7639	ENSG00000105750	8.65	8.28	No
GSHG0012690	PRR11	down	1.29	0.0134	chr17(+):57247101-57281195	UCSC	proline rich 11	FLJ11029	BC008669	55771	ENSG00000068489	9.82	9.45	No
GSHG0012248	TBC1D26 // ZNF286A	down	1.29	0.0423	chr17(+):15603005-15649479	UCSC	TBC1 domain family, member 26 // zinc finger protein 286A	ZNF286 // KIAA1874 // MGC51025	AB058777	353149 // 57335	ENSG00000187607 // ENSG00000214946	7.52	7.15	Yes
GSHG0011852	RPGRIP1L	down	1.29	0.0306	chr16(-):53634600-53737801	UCSC	RPGRIP1-like	CORS3 // FTM // JBTS7 // KIAA1005 // MKS5 // NPHP8	CR749645	23322	ENSG00000103494	6.95	6.57	No
GSHG0008834	C14orf166	down	1.29	0.0268	chr14(+):52456193-52471414	UCSC	chromosome 14 open reading frame 166	CGI-99 // CLE // CLE7 // LCRP369 // RLLM1	AF151857	51637	ENSG00000087302	9.02	8.65	No
GSHG0008094	---	down	1.29	0.0342	chr13(+):46626983-46675482	UCSC	---	---	AK095119	---	---	7.64	7.27	No
GSHG0007873	CLIP1	down	1.29	0.0378	chr12(-):122755981-122907116	UCSC	CAP-GLY domain containing linker protein 1	RSN // CLIP // CLIP-170 // CLIP170 // CYLN1	X64838	6249	ENSG00000130779	8.03	7.66	No
GSHG0007638	NAP1L1	down	1.29	0.0237	chr12(-):76439960-76478515	UCSC	nucleosome assembly protein 1-like 1	MGC23410 // MGC8688 // NAP1 // NAP1L // NRP	AL162068	4673	ENSG00000187109	10.77	10.41	No
GSHG0031920	RPL10	down	1.29	0.0308	chrX(+):153626716-153630680	UCSC	ribosomal protein L10	DXS648 // DXS648E // FLJ23544 // L10 // NOV // QM	BC003358	6134	ENSG00000147403	10.62	10.25	No
GSHG0031909	SSR4	down	1.29	0.0117	chrX(+):153058971-153063960	UCSC	signal sequence receptor, delta	TRAPD	BC032351	6748	ENSG00000180879	8.33	7.96	No
GSHG0030544	RPL7A	down	1.29	0.00564	chr9(+):136215069-136218280	UCSC	ribosomal protein L7a	L7A // SURF3 // TRUP	BC105290	6130	ENSG00000148303	10.33	9.96	No
GSHG0028867	EPB49	down	1.29	0.00482	chr8(+):21911156-21940036	UCSC	erythrocyte membrane protein band 4.9 (dematin)	DMT	BC052805	2039	ENSG00000158856	7.4	7.03	No
GSHG0025515	ABT1	down	1.29	0.0209	chr6(+):26597181-26599375	UCSC	activator of basal transcription 1	---	BC066313	29777	ENSG00000146109	8.57	8.21	No
GSHG0024818	C5orf43	down	1.29	0.0432	chr5(-):60453531-60458297	UCSC	chromosome 5 open reading frame 43	DKFZP686E2158	BX538015	643155	ENSG00000188725	7.45	7.08	No
GSHG0024271	EGR1	down	1.29	0.048	chr5(+):137801169-137805189	UCSC	early growth response 1	AT225 // G0S30 // KROX-24 // NGFI-A // TIS8 // ZIF-268 // ZNF225	X52541	1958	ENSG00000120738	8.33	7.97	No
GSHG0003191	CELF2	down	1.29	0.0391	chr10(+):11047284-11376352	UCSC	CUGBP, Elav-like family member 2	CUGBP2 // BRUNOL3 // Etr-3 // NAPOR-2	AF090693	10659	ENSG00000048740	10.39	10.02	No
GSHG0019978	HMGXB4	down	1.29	0.0421	chr22(+):35653480-35691799	UCSC	HMG box domain containing 4	HMG2L1 // THC211630	AL079310	10042	ENSG00000100281	8.62	8.25	No
GSHG0019160	DSN1	down	1.29	0.0366	chr20(-):35380448-35402205	UCSC	DSN1, MIND kinetochore complex component, homolog (S. cerevisiae)	C20orf172 // dJ469A13.2 // hKNL-3 // KNL3 // MIS13	BC026011	79980	ENSG00000149636	9.46	9.1	No
GSHG0018251	RFTN2	down	1.29	0.0257	chr2(-):198435524-198540716	UCSC	raftlin family member 2	C2orf11 // FLJ30574 // Raftlin-2	BC111069	130132	ENSG00000162944	6.97	6.6	No
GSHG0017116	FAM117B	down	1.29	0.048	chr2(+):203499704-203631175	UCSC	family with sequence similarity 117, member B	ALS2CR13 // FLJ38771	AK096090	150864	ENSG00000138439	9.68	9.31	No
GSHG0015421	TUBB4A	down	1.28	0.0202	chr19(-):6494331-6502349	UCSC	tubulin, beta 4A class IVa	TUBB4 // beta-5	BC013683	10382	ENSG00000104833	8.13	7.77	No
GSHG0012389	ZNF207	down	1.28	0.0208	chr17(+):30677153-30707975	UCSC	zinc finger protein 207	---	AB209215	7756	ENSG00000010244	11.67	11.31	No
GSHG0012115	RPA1	down	1.28	0.042	chr17(+):1733307-1801369	UCSC	replication protein A1, 70kDa	HSSB // REPA1 // RF-A // RP-A // RPA70	BC018126	6117	ENSG00000132383	9.29	8.93	No
GSHG0010642	BCL2A1	down	1.28	0.024	chr15(-):80253234-80263564	UCSC	BCL2-related protein A1	HBPA1 // ACC-1 // ACC-2 // BCL2L5 // BFL1 // GRS	Y09397	597	ENSG00000140379	6.73	6.37	No
GSHG0010200	MEF2A	down	1.28	0.000883	chr15(+):100106156-100256608	UCSC	myocyte enhancer factor 2A	RSRFC4 // RSRFC9	AL831995	4205	ENSG00000068305	9.11	8.76	No
GSHG0009963	FEM1B	down	1.28	0.0433	chr15(+):68570141-68588193	UCSC	fem-1 homolog b (C. elegans)	---	AB007856	10116	ENSG00000169018	10.03	9.67	Yes
GSHG0009723	FAN1	down	1.28	0.0388	chr15(+):31196055-31283785	UCSC	FANCD2/FANCI-associated nuclease 1	KIAA1018 // MTMR15	AL833089	22909	ENSG00000198690	7.79	7.43	No
GSHG0008688	APEX1	down	1.28	0.0464	chr14(+):20923350-20925927	UCSC	APEX nuclease (multifunctional DNA repair enzyme) 1	APEX // APE // APE-1 // APEN // APX // HAP1 // REF-1 // REF1	AK098588	328	ENSG00000100823	11.28	10.92	No
GSHG0008466	TPT1	down	1.28	0.0086	chr13(-):45911008-45915347	UCSC	tumor protein, translationally-controlled 1	fortilin // TCTP	BC022436	7178	ENSG00000133112	12.77	12.42	No
GSHG0008235	RAP2A	down	1.28	0.0165	chr13(+):98084654-98120244	UCSC	RAP2A, member of RAS oncogene family	RAP2 // K-REV	BC041333	5911	ENSG00000125249	8.22	7.87	No
GSHG0008000	PABPC3	down	1.28	0.0392	chr13(+):25669389-25672231	UCSC	poly(A) binding protein, cytoplasmic 3	PABPL3 // PABP3 // tPABP	DQ892103	5042	ENSG00000151846	9.04	8.69	No
GSHG0007794	RPL6	down	1.28	0.00998	chr12(-):112842990-112847439	UCSC	ribosomal protein L6	TXREB1 // L6 // TAXREB107	BC004138	6128	ENSG00000089009	11.5	11.15	No
GSHG0006888	C12orf29	down	1.28	0.0412	chr12(+):88429268-88443936	UCSC	chromosome 12 open reading frame 29	DKFZp434N2030	AK095477	91298	ENSG00000133641	7.8	7.45	No
GSHG0006414	CD27	down	1.28	0.00708	chr12(+):6554033-6560883	UCSC	CD27 molecule	TNFRSF7 // S152 // Tp55	BC012160	939	ENSG00000139193	8.02	7.66	No
GSHG0006045	NDUFC2	down	1.28	0.0268	chr11(-):77779395-77791266	UCSC	NADH dehydrogenase (ubiquinone) 1, subcomplex unknown, 2, 14.5kDa	B14.5b // HLC-1	BC007323	4718	ENSG00000151366	10.69	10.34	No
GSHG0005745	MTCH2	down	1.28	0.0105	chr11(-):47638868-47664149	UCSC	mitochondrial carrier 2	---	AY380792	23788	ENSG00000109919	9.27	8.92	No
GSHG0000683	LRRC8B	down	1.28	0.0204	chr1(+):89990455-90059215	UCSC	leucine rich repeat containing 8 family, member B	KIAA0231 // TA-LRRP	BC060782	23507	ENSG00000197147	7.25	6.9	No
GSHG0003667	GSTO1	down	1.28	0.00522	chr10(+):106014650-106027221	UCSC	glutathione S-transferase omega 1	GSTTLp28 // P28	BC000127	9446	ENSG00000148834	8.07	7.72	No
GSHG0031992	---	down	1.28	0.00884	chrX(-):15843929-15872939	UCSC	---	---	AF251295	---	---	6.61	6.25	No
GSHG0030082	NUDT2	down	1.28	0.0331	chr9(+):34329575-34343696	UCSC	nudix (nucleoside diphosphate linked moiety X)-type motif 2	APAH1	U30313	318	ENSG00000164978	7.57	7.22	No
GSHG0029579	TCEA1	down	1.28	0.00864	chr8(-):54879109-54934859	UCSC	transcription elongation factor A (SII), 1	GTF2S // TCEA // SII // TF2S // TFIIS	M81601	6917	ENSG00000187735	9.56	9.21	Yes
GSHG0025197	FAM114A2	down	1.28	0.0309	chr5(-):153335160-153418481	UCSC	family with sequence similarity 114, member A2	C5orf3 // 133K02	JF432278	10827	ENSG00000055147	6.82	6.46	No
GSHG0024075	ZCCHC9	down	1.28	0.0429	chr5(+):80597422-80609115	UCSC	zinc finger, CCHC domain containing 9	DKFZp761J139 // PPP1R41	AL512712	84240	ENSG00000131732	7.72	7.37	No
GSHG0023897	C5orf51	down	1.28	0.0278	chr5(+):41904470-41921737	UCSC	chromosome 5 open reading frame 51	LOC285636	BX648350	285636	ENSG00000205765	8.18	7.83	No
GSHG0023447	SLC9B2	down	1.28	0.0239	chr4(-):103941389-103998439	UCSC	solute carrier family 9, subfamily B (cation proton antiporter 2), member 2	NHEDC2 // FLJ23984	BC047447	133308	ENSG00000164038	8.41	8.05	No
GSHG0002996	LIN9	down	1.28	0.0401	chr1(-):226418850-226497435	UCSC	lin-9 homolog (C. elegans)	TGS	BC065302	286826	ENSG00000183814	7.63	7.27	No
GSHG0021103	---	down	1.28	0.0239	chr3(+):123865875-123867565	UCSC	---	---	AK057974	---	---	6.46	6.11	No
GSHG0020322	EIF4ENIF1	down	1.28	0.0185	chr22(-):31835351-31885874	UCSC	eukaryotic translation initiation factor 4E nuclear import factor 1	2610509L04Rik // 4E-T // Clast4 // FLJ21601	BC032941	56478	ENSG00000184708	8.49	8.14	No
GSHG0019042	CRNKL1	down	1.28	0.0493	chr20(-):20015022-20036690	UCSC	crooked neck pre-mRNA splicing factor-like 1 (Drosophila)	CLF // Clf1 // CRN // SYF3	BC144222	51340	ENSG00000101343	8.04	7.68	No
GSHG0018673	DNMT3B	down	1.28	0.0417	chr20(+):31350191-31397161	UCSC	DNA (cytosine-5-)-methyltransferase 3 beta	---	DQ321787	1789	ENSG00000088305	7.96	7.61	No
GSHG0018549	C20orf196	down	1.28	0.0498	chr20(+):5731036-5845020	UCSC	chromosome 20 open reading frame 196	FLJ25067	AK292708	149840	ENSG00000171984	8.42	8.07	No
GSHG0018382	CUL3	down	1.28	0.0198	chr2(-):225334869-225450065	UCSC	cullin 3	---	AB014517	8452	ENSG00000036257	9.51	9.15	No
GSHG0013727	SLC25A19	down	1.27	0.0263	chr17(-):73269074-73285514	UCSC	solute carrier family 25 (mitochondrial thiamine pyrophosphate carrier), member 19	DNC // MUP1 // TPC	AK075239	60386	ENSG00000125454	8.15	7.81	No
GSHG0011523	MRPS34	down	1.27	0.0258	chr16(-):1821912-1823140	UCSC	mitochondrial ribosomal protein S34	MGC2616 // MRP-S12	BC001182	65993	ENSG00000074071	8.44	8.1	No
GSHG0010680	---	down	1.27	0.0384	chr15(-):83806816-83876770	UCSC	---	---	BC040554	---	---	9.46	9.11	Yes
GSHG0009845	HMGN2P46	down	1.27	0.0403	chr15(+):45803334-45848928	UCSC	high mobility group nucleosomal binding domain 2 pseudogene 46	C15orf21 // D-PCa-2 // FLJ39426	AK096745	283651	ENSG00000179362	7.33	6.99	No
GSHG0008237	IPO5	down	1.27	0.039	chr13(+):98605948-98675329	UCSC	importin 5	KPNB3 // RANBP5 // IMB3 // MGC2068	Y08890	3843	ENSG00000065150	9.71	9.36	No
GSHG0001198	PRDX6	down	1.27	0.00486	chr1(+):173446476-173457952	UCSC	peroxiredoxin 6	1-Cys // aiPLA2 // AOP2 // KIAA0106 // MGC46173 // NSGPx // p29 // PRX	BC035857	9588	ENSG00000117592	8.74	8.4	No
GSHG0006986	USP30	down	1.27	0.00984	chr12(+):109460894-109524182	UCSC	ubiquitin specific peptidase 30	FLJ40511 // MGC10702	AK097830	84749	ENSG00000135093	8.69	8.35	No
GSHG0005805	PATL1	down	1.27	0.0182	chr11(-):59404186-59436471	UCSC	protein associated with topoisomerase II homolog 1 (yeast)	FLJ36874	AL831992	219988	ENSG00000166889	10.11	9.76	No
GSHG0004800	C11orf49	down	1.27	0.0292	chr11(+):47073938-47183796	UCSC	chromosome 11 open reading frame 49	FLJ22210 // MGC4707	AK300813	79096	ENSG00000149179	8.49	8.15	No
GSHG0032202	HMGN5	down	1.27	0.0307	chrX(-):80369200-80457441	UCSC	high mobility group nucleosome binding domain 5	NSBP1	AX748432	79366	ENSG00000198157	6.92	6.57	No
GSHG0031780	SLC25A5	down	1.27	0.0137	chrX(+):118602383-118605280	UCSC	solute carrier family 25 (mitochondrial carrier; adenine nucleotide translocator), member 5	ANT2 // 2F1 // T2 // T3	J02683	292	ENSG00000005022	11.13	10.79	No
GSHG0031318	---	down	1.27	0.0391	chr9(-):140703301-140703875	UCSC	---	---	BC127632	---	---	7.44	7.1	No
GSHG0030393	ATP6V1G1	down	1.27	0.0247	chr9(+):117350068-117360654	UCSC	ATPase, H+ transporting, lysosomal 13kDa, V1 subunit G1	ATP6G1 // ATP6J // ATP6G // ATP6GL // DKFZp547P234 // Vma10	BC008452	9550	ENSG00000136888	10.14	9.8	Yes
GSHG0029556	THAP1	down	1.27	0.012	chr8(-):42691814-42698468	UCSC	THAP domain containing, apoptosis associated protein 1	DYT6 // 4833431A01Rik // FLJ10477	AK001339	55145	ENSG00000131931	8.19	7.84	No
GSHG0029377	---	down	1.27	0.0291	chr8(-):7134218-7212876	UCSC	---	---	AK307331	---	---	7.94	7.59	Yes
GSHG0000499	---	down	1.27	0.0351	chr1(+):50459990-50461874	UCSC	---	---	AF119862	---	---	7.07	6.73	Yes
GSHG0024276	PAIP2	down	1.27	0.0102	chr5(+):138677540-138705407	UCSC	poly(A) binding protein interacting protein 2	PAIP2A	AL136640	51247	ENSG00000120727	10.96	10.61	No
GSHG0024247	SEC24A	down	1.27	0.0451	chr5(+):133984475-134063499	UCSC	SEC24 family, member A (S. cerevisiae)	---	AJ131244	10802	ENSG00000113615	7.78	7.44	No
GSHG0024205	PRRC1	down	1.27	0.0377	chr5(+):126853337-126890782	UCSC	proline-rich coiled-coil 1	FLJ32875	AL832056	133619	ENSG00000164244	9.86	9.51	No
GSHG0023531	C4orf49	down	1.27	0.0435	chr4(-):140187317-140201492	UCSC	chromosome 4 open reading frame 49	OSAP	AF484960	84709	ENSG00000137463	6.76	6.42	No
GSHG0021883	POU1F1	down	1.27	0.00858	chr3(-):87308783-87325737	UCSC	POU class 1 homeobox 1	PIT1 // GHF-1 // POU1F1a	D10216	5449	ENSG00000064835	5.84	5.49	No
GSHG0021384	POLR2H	down	1.27	0.0491	chr3(+):184081203-184086363	UCSC	polymerase (RNA) II (DNA directed) polypeptide H	RPB8	Z49199	5437	ENSG00000163882	9.7	9.35	No
GSHG0020670	STT3B	down	1.27	0.0107	chr3(+):31574130-31679112	UCSC	STT3, subunit of the oligosaccharyltransferase complex, homolog B (S. cerevisiae)	FLJ90106 // SIMP // STT3-B	AY074880	201595	ENSG00000163527	11.57	11.22	Yes
GSHG0019485	ETS2	down	1.27	0.0256	chr21(+):40177231-40195722	UCSC	v-ets erythroblastosis virus E26 oncogene homolog 2 (avian)	---	AK096841	2114	ENSG00000157557	10.26	9.91	No
GSHG0019315	TCFL5	down	1.27	0.0353	chr20(-):61472468-61493116	UCSC	transcription factor-like 5 (basic helix-loop-helix)	bHLHe82 // CHA // E2BP-1 // Figlb	AB012124	10732	ENSG00000101190	9.34	9	Yes
GSHG0016174	ZNF606	down	1.27	0.00202	chr19(-):58478158-58516313	UCSC	zinc finger protein 606	ZNF328 // FLJ14260 // KIAA1852	BC036570	80095	ENSG00000166704	8.2	7.86	No
GSHG0015257	ZNF773	down	1.26	0.0469	chr19(+):58011303-58029772	UCSC	zinc finger protein 773	ZNF419B // MGC4728	AK160372	374928	ENSG00000152439	7.91	7.58	Yes
GSHG0014892	FAM98C	down	1.26	0.0105	chr19(+):38893209-38899728	UCSC	family with sequence similarity 98, member C	FLJ44669	HQ258606	147965	ENSG00000130244	7.4	7.06	Yes
GSHG0014670	FAM32A	down	1.26	0.0119	chr19(+):16296229-16302857	UCSC	family with sequence similarity 32, member A	DKFZP586O0120	BC000639	26017	ENSG00000105058	8.42	8.08	No
GSHG0014341	BCL2	down	1.26	0.0363	chr18(-):60790579-60987361	UCSC	B-cell CLL/lymphoma 2	Bcl-2 // PPP1R50	M14745	596	ENSG00000171791	10.53	10.2	Yes
GSHG0014285	PIAS2	down	1.26	0.0415	chr18(-):44392243-44500123	UCSC	protein inhibitor of activated STAT, 2	miz // PIASX-ALPHA // PIASX-BETA // ZMIZ4	AK308143	9063	ENSG00000078043	8.85	8.51	No
GSHG0012134	CTNS	down	1.26	0.0452	chr17(+):3539773-3564835	UCSC	cystinosin, lysosomal cystine transporter	CTNS-LSB // PQLC4	BC032850	1497	ENSG00000040531	7.21	6.87	No
GSHG0011880	CNOT1	down	1.26	0.0434	chr16(-):58553854-58663750	UCSC	CCR4-NOT transcription complex, subunit 1	NOT1 // AD-005 // CDC39 // KIAA1007 // NOT1H	AK056927	23019	ENSG00000125107	10.2	9.86	Yes
GSHG0010860	MLST8	down	1.26	0.00652	chr16(+):2255205-2259417	UCSC	MTOR associated protein, LST8 homolog (S. cerevisiae)	GbetaL // GBL // Lst8 // Pop3	AK021536	64223	ENSG00000167965	8.63	8.3	No
GSHG0010593	COX5A	down	1.26	0.0424	chr15(-):75212619-75230469	UCSC	cytochrome c oxidase subunit Va	---	BC024240	9377	ENSG00000178741	10.25	9.92	Yes
GSHG0010155	BLM	down	1.26	0.0418	chr15(+):91260602-91358684	UCSC	Bloom syndrome, RecQ helicase-like	BS // RECQ2 // RECQL3	BC034480	641	ENSG00000197299	8.41	8.08	No
GSHG0009262	NEDD8	down	1.26	0.0304	chr14(-):24686065-24701579	UCSC	neural precursor cell expressed, developmentally down-regulated 8	Nedd-8	BC104664	4738	ENSG00000129559	9.75	9.41	No
GSHG0008974	ACOT2	down	1.26	0.0444	chr14(+):74034324-74042360	UCSC	acyl-CoA thioesterase 2	Mte1 // ZAP128	AK093131	10965	ENSG00000119673	7.31	6.98	Yes
GSHG0008400	HMGB1	down	1.26	0.0428	chr13(-):31032884-31191736	UCSC	high mobility group box 1	HMG1 // DKFZp686A04236 // HMG3 // SBP-1	AK122825	3146	ENSG00000189403	11.26	10.92	No
GSHG0007318	LDHB	down	1.26	0.0214	chr12(-):21788276-21810780	UCSC	lactate dehydrogenase B	---	BC015122	3945	ENSG00000111716	10.99	10.66	No
GSHG0006537	---	down	1.26	0.0239	chr12(+):22838921-22843599	UCSC	---	---	CR749601	---	---	8.09	7.76	No
GSHG0004535	MRPL23	down	1.26	0.0347	chr11(+):1968538-1999674	UCSC	mitochondrial ribosomal protein L23	RPL23L // L23MRP	AK128774	6150	ENSG00000214026	7.29	6.96	No
GSHG0031009	C9orf156	down	1.26	0.015	chr9(-):100666772-100684852	UCSC	chromosome 9 open reading frame 156	HSPC219 // NAP1	AK000213	51531	ENSG00000136932	8.01	7.68	No
GSHG0028755	---	down	1.26	0.0117	chr7(-):157653317-157654947	UCSC	---	---	AK057320	---	---	6.55	6.21	No
GSHG0028657	---	down	1.26	0.0276	chr7(-):142138715-142145505	UCSC	---	---	BC035390	---	---	7.78	7.45	No
GSHG0026539	RPS10	down	1.26	0.0243	chr6(-):34385231-34393849	UCSC	ribosomal protein S10	MGC88819 // S10	BC071946	6204	ENSG00000124614	9.45	9.12	No
GSHG0024277	UBE2D2	down	1.26	0.0225	chr5(+):138940751-139008016	UCSC	ubiquitin-conjugating enzyme E2D 2	UBC4 // UbcH5B	AK001428	7322	ENSG00000131508	10.3	9.96	No
GSHG0023625	TMEM192	down	1.26	0.0201	chr4(-):165999100-166129701	UCSC	transmembrane protein 192	FLJ38482	AK095801	201931	ENSG00000170088	6.78	6.44	Yes
GSHG0021640	HIGD1A	down	1.26	0.00154	chr3(-):42825793-42845997	UCSC	HIG1 hypoxia inducible domain family, member 1A	DKFZP564K247 // HIG1	AL110233	25994	ENSG00000181061	10.09	9.77	Yes
GSHG0020994	RG9MTD1	down	1.26	0.0466	chr3(+):101280706-101285087	UCSC	RNA (guanine-9-) methyltransferase domain containing 1	FLJ20432 // MRPP1	BC035967	54931	ENSG00000174173	7.26	6.93	No
GSHG0020018	TOMM22	down	1.26	0.0408	chr22(+):39077956-39080492	UCSC	translocase of outer mitochondrial membrane 22 homolog (yeast)	TOM22	AK024731	56993	ENSG00000100216	9.65	9.32	No
GSHG0018788	DNTTIP1	down	1.26	0.0132	chr20(+):44420582-44440058	UCSC	deoxynucleotidyltransferase, terminal, interacting protein 1	C20orf167 // dJ447F3.4 // Tdif1	AB035676	116092	ENSG00000101457	8.18	7.84	No
GSHG0016239	CPSF3	down	1.26	0.0412	chr2(+):9563780-9613230	UCSC	cleavage and polyadenylation specific factor 3, 73kDa	CPSF-73 // CPSF73 // YSH1	AK298918	51692	ENSG00000119203	8.57	8.24	No
GSHG0015458	NDUFA7	down	1.25	0.041	chr19(-):8376234-8386280	UCSC	NADH dehydrogenase (ubiquinone) 1 alpha subcomplex, 7, 14.5kDa	B14.5a	BC003102	4701	ENSG00000167774	9.05	8.73	No
GSHG0014944	HNRNPUL1	down	1.25	0.0038	chr19(+):41768401-41813503	UCSC	heterogeneous nuclear ribonucleoprotein U-like 1	HNRPUL1 // E1B-AP5 // E1BAP5 // FLJ12944	AK225850	11100	ENSG00000105323	10.63	10.3	No
GSHG0014901	MRPS12	down	1.25	0.0468	chr19(+):39421188-39423657	UCSC	mitochondrial ribosomal protein S12	RPMS12 // RPS12 // RPSM12	BC006424	6183	ENSG00000128626	7.07	6.74	No
GSHG0013323	---	down	1.25	0.0381	chr17(-):37006339-37009975	UCSC	---	---	X55954	---	---	11.22	10.9	No
GSHG0012241	COX10	down	1.25	0.0398	chr17(+):13972824-14111992	UCSC	COX10 homolog, cytochrome c oxidase assembly protein, heme A: farnesyltransferase (yeast)	---	BC006394	1352	ENSG00000006695	8.44	8.12	No
GSHG0011937	CHTF8	down	1.25	0.00272	chr16(-):69151913-69166473	UCSC	CTF8, chromosome transmission fidelity factor 8 homolog (S. cerevisiae)	CTF8 // DERPC // FLJ20400	AF525164	54921	ENSG00000168802	8.99	8.67	No
GSHG0010124	AEN	down	1.25	0.012	chr15(+):89164566-89175518	UCSC	apoptosis enhancing nuclease	ISG20L1 // FLJ12484 // FLJ12562	BC020988	64782	ENSG00000181026	8.28	7.96	No
GSHG0009050	PSMC1	down	1.25	0.031	chr14(+):90722888-90739034	UCSC	proteasome (prosome, macropain) 26S subunit, ATPase, 1	p56 // S4	L02426	5700	ENSG00000100764	8.26	7.94	No
GSHG0008242	---	down	1.25	0.0316	chr13(+):99049409-99050152	UCSC	---	---	AF339830	---	---	6.62	6.29	No
GSHG0007599	GNS	down	1.25	0.0302	chr12(-):65107225-65153187	UCSC	glucosamine (N-acetyl)-6-sulfatase	---	AK296759	2799	ENSG00000135677	7.96	7.64	No
GSHG0006641	TMBIM6	down	1.25	0.0369	chr12(+):50135339-50158717	UCSC	transmembrane BAX inhibitor motif containing 6	TEGT // BAXI1 // BI-1	AK130050	7009	ENSG00000139644	11.48	11.16	Yes
GSHG0031487	PHF16	down	1.25	0.028	chrX(+):46771736-46920640	UCSC	PHD finger protein 16	KIAA0215	D86969	9767	ENSG00000102221	7.91	7.59	No
GSHG0030753	B4GALT1	down	1.25	0.00958	chr9(-):33104080-33167354	UCSC	UDP-Gal:betaGlcNAc beta 1,4- galactosyltransferase, polypeptide 1	GGTB2 // beta4Gal-T1	BC045773	2683	ENSG00000086062	7.35	7.03	Yes
GSHG0030377	SLC31A2	down	1.25	0.0277	chr9(+):115913265-115926420	UCSC	solute carrier family 31 (copper transporters), member 2	COPT2 // CTR2 // hCTR2	AX810714	1318	ENSG00000136867	7.36	7.04	No
GSHG0030322	---	down	1.25	0.0402	chr9(+):103115343-103156151	UCSC	---	---	BC042955	---	---	6.76	6.43	Yes
GSHG0026368	HIST1H2AB	down	1.25	0.017	chr6(-):26033338-26033844	UCSC	histone cluster 1, H2ab	H2AFM // H2A/m	BC125140	8335	ENSG00000137259	7.85	7.53	Yes
GSHG0003250	MSRB2	down	1.25	0.0353	chr10(+):23384378-23410090	UCSC	methionine sulfoxide reductase B2	MSRB // CBS-1 // CBS1 // CGI-131 // PILB	AF151889	22921	ENSG00000148450	7.33	7.01	No
GSHG0025685	SRSF3	down	1.25	0.000155	chr6(+):36562139-36571209	UCSC	serine/arginine-rich splicing factor 3	SFRS3 // SRp20	AF107405	6428	ENSG00000112081	10.85	10.54	No
GSHG0025007	ATG12	down	1.25	0.0324	chr5(-):115166394-115177542	UCSC	ATG12 autophagy related 12 homolog (S. cerevisiae)	APG12L // APG12	BC011033	9140	ENSG00000145782	8.6	8.28	No
GSHG0024473	RPL26L1	down	1.25	0.00268	chr5(+):172386439-172396772	UCSC	ribosomal protein L26-like 1	RPL26P1	BC017360	51121	ENSG00000037241	8.07	7.75	Yes
GSHG0024046	F2R	down	1.25	0.0265	chr5(+):76011868-76031298	UCSC	coagulation factor II (thrombin) receptor	CF2R // PAR-1 // PAR1 // TR	M62424	2149	ENSG00000181104	8.48	8.16	No
GSHG0003104	TFB2M	down	1.25	0.0411	chr1(-):246703868-246729563	UCSC	transcription factor B2, mitochondrial	FLJ22661 // FLJ23182 // Hkp1	AK026835	64216	ENSG00000162851	7.9	7.57	No
GSHG0021239	GYG1	down	1.25	0.0423	chr3(+):148709299-148745419	UCSC	glycogenin 1	GYG	U31525	2992	ENSG00000163754	6.99	6.67	No
GSHG0020356	TXN2	down	1.25	0.0332	chr22(-):36863088-36878077	UCSC	thioredoxin 2	MT-TRX	AF480262	25828	ENSG00000100348	8.28	7.96	No
GSHG0033384	TUBA8	down	1.25	0.042	chr22(+):18593451-18614498	UCSC	tubulin, alpha 8	TUBAL2	AJ245922	51807	ENSG00000183785	7.62	7.29	No
GSHG0019334	STMN3	down	1.25	0.0119	chr20(-):62271064-62284820	UCSC	stathmin-like 3	SCLIP	BC025234	50861	ENSG00000197457	8.65	8.32	No
GSHG0018724	RPN2	down	1.25	0.00868	chr20(+):35807470-35870023	UCSC	ribophorin II	RIBIIR // RPN-II // RPNII // SWP1	Y00282	6185	ENSG00000118705	10.13	9.8	No
GSHG0016828	TSN	down	1.25	0.0318	chr2(+):122513236-122524867	UCSC	translin	BCLF-1 // REHF-1 // TRSLN	X78627	7247	ENSG00000211460	8.38	8.06	Yes
GSHG0016091	---	down	1.25	0.00872	chr19(-):53741850-53745056	UCSC	---	---	AK124227	---	---	7.69	7.37	No
GSHG0015586	WIZ	down	1.24	0.00774	chr19(-):15532355-15560763	UCSC	widely interspaced zinc finger motifs	ZNF803	AK131404	58525	ENSG00000011451	8.75	8.44	No
GSHG0014795	CEBPG	down	1.24	0.0213	chr19(+):33864236-33873591	UCSC	CCAAT/enhancer binding protein (C/EBP), gamma	GPE1BP // IG/EBP-1	BC013128	1054	ENSG00000153879	8.47	8.17	No
GSHG0012908	ANAPC11	down	1.24	0.0373	chr17(+):79849597-79858867	UCSC	anaphase promoting complex subunit 11	APC11 // Apc11p // HSPC214 // MGC882	BC171900	51529	ENSG00000141552	8.06	7.75	No
GSHG0012318	DHRS7B	down	1.24	0.0203	chr17(+):21030254-21094836	UCSC	dehydrogenase/reductase (SDR family) member 7B	CGI-93 // DKFZp566O084 // MGC8916 // SDR32C1	AF151851	25979	ENSG00000109016	7.51	7.2	No
GSHG0011674	ARL6IP1	down	1.24	0.00134	chr16(-):18802983-18812870	UCSC	ADP-ribosylation factor-like 6 interacting protein 1	ARL6IP // AIP1 // ARMER // KIAA0069	BX648446	23204	ENSG00000170540	11.17	10.86	No
GSHG0011572	ZNF597	down	1.24	0.0102	chr16(-):3486106-3493502	UCSC	zinc finger protein 597	FLJ33071	AK057633	146434	ENSG00000167981	7.13	6.81	No
GSHG0011271	C16orf70	down	1.24	0.00494	chr16(+):67143866-67182440	UCSC	chromosome 16 open reading frame 70	C16orf6 // LIN10 // FLJ12076 // lin-10	BC004556	80262	ENSG00000125149	8.27	7.96	No
GSHG0007102	ATP6V0A2	down	1.24	0.0164	chr12(+):124196865-124242832	UCSC	ATPase, H+ transporting, lysosomal V0 subunit a2	a2 // ATP6a2 // ATP6N1D // J6B7 // Stv1 // TJ6 // TJ6M // TJ6s // Vph1	BC068531	23545	ENSG00000185344	8.98	8.67	No
GSHG0033615	---	down	1.24	0.028	chr12(+):121865531-121868422	UCSC	---	---	AK055282	---	---	7.52	7.2	No
GSHG0004510	RPLP2	down	1.24	0.00904	chr11(+):809968-812876	UCSC	ribosomal protein, large, P2	D11S2243E // LP2 // MGC71408 // P2 // RPP2	M17887	6181	ENSG00000177600	11.88	11.58	No
GSHG0004507	TALDO1	down	1.24	0.0238	chr11(+):747427-765012	UCSC	transaldolase 1	---	BC009680	6888	ENSG00000177156	9.78	9.47	Yes
GSHG0004159	DNAJC9 // MRPS16	down	1.24	0.0233	chr10(-):75002590-75012409	UCSC	DnaJ (Hsp40) homolog, subfamily C, member 9 // mitochondrial ribosomal protein S16	CGI-132 // JDD1 // SB73	AK094162	23234 // 51021	ENSG00000182180 // ENSG00000213551	8.58	8.26	Yes
GSHG0032295	NKRF	down	1.24	0.0347	chrX(-):118722302-118739846	UCSC	NFKB repressing factor	ITBA4 // NRF	AY208891	55922	ENSG00000186416	8.11	7.79	No
GSHG0032142	ZC4H2	down	1.24	0.0283	chrX(-):64136250-64254593	UCSC	zinc finger, C4H2 domain containing	KIAA1166 // HCA127	AK022807	55906	ENSG00000126970	9.24	8.93	Yes
GSHG0031701	BHLHB9	down	1.24	0.0221	chrX(+):101975654-102007368	UCSC	basic helix-loop-helix domain containing, class B, 9	KIAA1701 // p60TRP	BC041409	80823	ENSG00000198908	6.83	6.52	No
GSHG0031315	ZMYND19	down	1.24	0.0413	chr9(-):140476531-140484942	UCSC	zinc finger, MYND-type containing 19	MIZIP	AX766496	116225	ENSG00000165724	8.08	7.77	No
GSHG0030091	DNAJB5	down	1.24	0.0359	chr9(+):34989742-34998428	UCSC	DnaJ (Hsp40) homolog, subfamily B, member 5	Hsc40	AK023253	25822	ENSG00000137094	8.01	7.7	No
GSHG0003211	MCM10	down	1.24	0.038	chr10(+):13203579-13253095	UCSC	minichromosome maintenance complex component 10	CNA43 // DNA43 // PRO2249	AL136840	55388	ENSG00000065328	8.62	8.3	No
GSHG0033438	KLHL8	down	1.24	0.0228	chr4(-):88081401-88141710	UCSC	kelch-like 8 (Drosophila)	KIAA1378	BX640744	57563	ENSG00000145332	7.23	6.92	No
GSHG0020718	EIF1B	down	1.24	0.0139	chr3(+):40351178-40353913	UCSC	eukaryotic translation initiation factor 1B	GC20	BC006996	10289	ENSG00000114784	7.52	7.21	No
GSHG0000422	NFYC	down	1.24	0.0347	chr1(+):41157356-41237275	UCSC	nuclear transcription factor Y, gamma	CBF-C // NF-YC	Z74792	4802	ENSG00000066136	10.01	9.7	No
GSHG0016177	ZNF329	down	1.24	0.00492	chr19(-):58637619-58666477	UCSC	zinc finger protein 329	FLJ12586	AX746666	79673	ENSG00000181894	8.17	7.86	No
GSHG0015971	FAM83E	down	1.24	0.0199	chr19(-):49104066-49116819	UCSC	family with sequence similarity 83, member E	FLJ20200	AK000207	54854	ENSG00000105523	7.91	7.59	No
GSHG0015948	ZC3H4	down	1.24	0.00294	chr19(-):47567449-47617009	UCSC	zinc finger CCCH-type containing 4	C19orf7 // KIAA1064	AB028987	23211	ENSG00000130749	8.79	8.47	No
GSHG0015334	---	down	1.23	0.0347	chr19(-):2212028-2215564	UCSC	---	---	AX746733	---	---	8.56	8.26	No
GSHG0013720	ATP5H	down	1.23	0.0339	chr17(-):73034959-73043064	UCSC	ATP synthase, H+ transporting, mitochondrial Fo complex, subunit d	ATP5JD // ATPQ	AF087135	10476	ENSG00000167863	9.88	9.58	No
GSHG0013632	MED13	down	1.23	0.0214	chr17(-):60021750-60142643	UCSC	mediator complex subunit 13	THRAP1 // KIAA0593 // TRAP240	AF117754	9969	ENSG00000108510	9.67	9.38	No
GSHG0012387	RHOT1	down	1.23	0.0384	chr17(+):30469473-30552788	UCSC	ras homolog gene family, member T1	ARHT1 // FLJ11040 // MIRO-1	BC060781	55288	ENSG00000126858	9.05	8.75	No
GSHG0011592	FAM100A	down	1.23	0.0479	chr16(-):4658886-4664927	UCSC	family with sequence similarity 100, member A	---	BC062534	124402	ENSG00000153443	8.15	7.85	No
GSHG0009884	TCF12	down	1.23	0.0477	chr15(+):57210323-57580712	UCSC	transcription factor 12	bHLHb20 // HEB // HsT17266 // HTF4	AL831981	6938	ENSG00000140262	10.93	10.63	No
GSHG0009428	MAX	down	1.23	0.0491	chr14(-):65541845-65569238	UCSC	MYC associated factor X	bHLHd4 // bHLHd5 // bHLHd6 // bHLHd7 // bHLHd8	AL833643	4149	ENSG00000125952	11.08	10.79	No
GSHG0007897	CCDC92	down	1.23	0.0178	chr12(-):124420955-124457163	UCSC	coiled-coil domain containing 92	FLJ22471	AK026124	80212	ENSG00000119242	8.34	8.04	No
GSHG0006698	---	down	1.23	0.0329	chr12(+):53907768-53911390	UCSC	---	---	BC073920	---	---	6.67	6.37	No
GSHG0006648	SMARCD1	down	1.23	0.0269	chr12(+):50479004-50494423	UCSC	SWI/SNF related, matrix associated, actin dependent regulator of chromatin, subfamily d, member 1	BAF60A // CRACD1 // Rsc6p	BC009368	6602	ENSG00000066117	9.91	9.61	No
GSHG0005308	TRAPPC4	down	1.23	0.00524	chr11(+):118889241-118896162	UCSC	trafficking protein particle complex 4	PTD009 // SBDN // TRS23	AK025623	51399	ENSG00000196655	7.91	7.62	No
GSHG0004991	FAM89B	down	1.23	0.0166	chr11(+):65339331-65341661	UCSC	family with sequence similarity 89, member B	---	BC023991	23625	ENSG00000176973	9.36	9.06	No
GSHG0004310	CWF19L1	down	1.23	0.0283	chr10(-):101992050-102027437	UCSC	CWF19-like 1, cell cycle control (S. pombe)	FLJ10998	AK097895	55280	ENSG00000095485	8.25	7.96	No
GSHG0031564	APEX2	down	1.23	0.0237	chrX(+):55026790-55034211	UCSC	APEX nuclease (apurinic/apyrimidinic endonuclease) 2	APE2 // APEXL2 // XTH2	AJ011311	27301	ENSG00000169188	7.69	7.39	No
GSHG0030909	UBQLN1	down	1.23	0.00424	chr9(-):86274879-86323120	UCSC	ubiquilin 1	DA41 // DSK2 // PLIC-1 // XDRP1	BC039294	29979	ENSG00000135018	10.47	10.17	No
GSHG0029968	RPL8	down	1.23	0.0283	chr8(-):146015154-146093852	UCSC	ribosomal protein L8	L8	Z28407	6132	ENSG00000161016	11.87	11.57	Yes
GSHG0029499	INTS9	down	1.23	0.0453	chr8(-):28625180-28782448	UCSC	integrator complex subunit 9	CPSF2L // FLJ10871 // RC-74	AK225530	55756	ENSG00000104299	8.15	7.86	No
GSHG0003301	CCNY	down	1.23	0.0265	chr10(+):35535953-35860720	UCSC	cyclin Y	C10orf9 // CBCP1 // CFP1	AF429969	219771	ENSG00000108100	8.47	8.18	Yes
GSHG0020007	EIF3L	down	1.23	0.00858	chr22(+):38244875-38284638	UCSC	eukaryotic translation initiation factor 3, subunit L	EIF3EIP // EIF3S6IP // EIF3S11 // HSPC021 // HSPC025	AK056129	51386	ENSG00000100129	10.88	10.59	No
GSHG0018709	ERGIC3	down	1.23	0.00662	chr20(+):34129818-34145409	UCSC	ERGIC and golgi 3	C20orf47 // SDBCAG84 // CGI-54 // Erv46 // NY-BR-84 // PRO0989	EF206690	51614	ENSG00000125991	9.54	9.24	No
GSHG0015856	DEDD2	down	1.23	0.0372	chr19(-):42702751-42721868	UCSC	death effector domain containing 2	FLAME-3	AK075328	162989	ENSG00000160570	8.32	8.02	No
GSHG0015176	PRPF31	down	1.22	0.0247	chr19(+):54618831-54635150	UCSC	PRP31 pre-mRNA processing factor 31 homolog (S. cerevisiae)	RP11 // NY-BR-99 // PRP31	AY040822	26121	ENSG00000105618	9.15	8.86	No
GSHG0014787	PDCD5	down	1.22	0.0478	chr19(+):33072096-33078208	UCSC	programmed cell death 5	MGC9294 // TFAR19	AB590247	9141	ENSG00000105185	8.29	8	Yes
GSHG0014658	CYP4F3	down	1.22	0.038	chr19(+):15747819-15771568	UCSC	cytochrome P450, family 4, subfamily F, polypeptide 3	LTB4H // CYP4F	AK296761	4051	ENSG00000186529	6.78	6.49	Yes
GSHG0014310	MEX3C	down	1.22	0.0277	chr18(-):48700922-48723690	UCSC	mex-3 homolog C (C. elegans)	RKHD2 // FLJ38871 // RNF194	AK096190	51320	ENSG00000176624	9.66	9.37	No
GSHG0013879	MYL12B	down	1.22	0.0294	chr18(+):3262116-3278247	UCSC	myosin, light chain 12B, regulatory	MRLC2	AY320408	103910	ENSG00000118680	10.66	10.38	No
GSHG0013729	GRB2	down	1.22	0.00372	chr17(-):73315546-73401785	UCSC	growth factor receptor-bound protein 2	NCKAP2	AK091010	2885	ENSG00000177885	9.47	9.18	No
GSHG0011510	---	down	1.22	0.0218	chr16(-):1114093-1128673	UCSC	---	---	AK056814	---	---	7.79	7.51	Yes
GSHG0011215	MT1DP	down	1.22	0.0148	chr16(+):56677599-56679162	UCSC	metallothionein 1D, pseudogene	MTM	AF348999	326343	ENSG00000205361	8.82	8.53	No
GSHG0010904	NAA60	down	1.22	0.00802	chr16(+):3493682-3536962	UCSC	N(alpha)-acetyltransferase 60, NatF catalytic subunit	NAT15 // FLJ14154	AL833594	79903	ENSG00000122390	9.44	9.15	No
GSHG0000297	PPP1R8	down	1.22	0.0421	chr1(+):28157324-28178183	UCSC	protein phosphatase 1, regulatory subunit 8	ard-1 // ARD1 // NIPP-1 // NIPP1 // PRO2047	AF061958	5511	ENSG00000117751	8.33	8.05	Yes
GSHG0006741	PA2G4	down	1.22	0.045	chr12(+):56498321-56507086	UCSC	proliferation-associated 2G4, 38kDa	---	U59435	5036	ENSG00000170515	11.05	10.76	No
GSHG0005008	SF3B2	down	1.22	0.0395	chr11(+):65819831-65836380	UCSC	splicing factor 3b, subunit 2, 145kDa	Cus1 // SAP145 // SF3b1 // SF3b145	BX537771	10992	ENSG00000087365	9.31	9.02	Yes
GSHG0032132	SPIN2A	down	1.22	0.0222	chrX(-):57160963-57164058	UCSC	spindlin family, member 2A	SPIN2 // DXF34	Y09858	54466	ENSG00000147059	6.9	6.61	Yes
GSHG0003598	UBTD1	down	1.22	0.035	chr10(+):99258768-99330961	UCSC	ubiquitin domain containing 1	FLJ11807	BC007331	80019	ENSG00000165886	8.22	7.93	No
GSHG0031167	RPL12	down	1.22	0.0128	chr9(-):130209954-130213688	UCSC	ribosomal protein L12	L12	BC105603	6136	ENSG00000197958	11.4	11.11	Yes
GSHG0028476	SYPL1	down	1.22	0.0222	chr7(-):105730954-105753022	UCSC	synaptophysin-like 1	SYPL	X68194	6856	ENSG00000008282	10.26	9.98	No
GSHG0027981	---	down	1.22	0.00338	chr7(-):5365385-5368546	UCSC	---	---	AK024405	---	---	6.45	6.17	Yes
GSHG0027146	ZNF815	down	1.22	0.0196	chr7(+):5862790-5894066	UCSC	zinc finger protein 815	FLJ38969	AK096288	401303	ENSG00000235944	6.54	6.25	No
GSHG0025647	RPS18	down	1.22	0.0163	chr6(+):33239799-33244286	UCSC	ribosomal protein S18	D6S218E // HKE3 // KE-3 // KE3 // S18	BC106063	6222	ENSG00000231500	10.76	10.47	No
GSHG0025232	C5orf54	down	1.22	0.0331	chr5(-):159820543-159827043	UCSC	chromosome 5 open reading frame 54	Buster3	BC032603	63920	ENSG00000221886	6.13	5.85	Yes
GSHG0025014	DTWD2	down	1.22	0.00678	chr5(-):118173018-118324240	UCSC	DTW domain containing 2	FLJ33977	BX648369	285605	ENSG00000169570	7.1	6.81	No
GSHG0022780	OSTC	down	1.22	0.0368	chr4(+):109571751-109588974	UCSC	oligosaccharyltransferase complex subunit	DC2	BC054857	58505	ENSG00000198856	10.23	9.94	Yes
GSHG0021240	HPS3	down	1.22	0.05	chr3(+):148847371-148890746	UCSC	Hermansky-Pudlak syndrome 3	SUTAL	AY033141	84343	ENSG00000163755	9.64	9.35	No
GSHG0019241	STAU1	down	1.22	0.0403	chr20(-):47729876-47805300	UCSC	staufen, RNA binding protein, homolog 1 (Drosophila)	STAU	AY546099	6780	ENSG00000124214	9.6	9.31	No
GSHG0018831	PTPN1	down	1.22	0.0463	chr20(+):49126891-49201088	UCSC	protein tyrosine phosphatase, non-receptor type 1	PTP1B	BC015660	5770	ENSG00000196396	8.57	8.28	No
GSHG0016100	TFPT	down	1.22	0.03	chr19(-):54610328-54619038	UCSC	TCF3 (E2A) fusion partner (in childhood Leukemia)	amida // FB1 // INO80F	AF052052	29844	ENSG00000105619	7.72	7.43	No
GSHG0014981	ZNF222 // ZNF223 // ZNF284	down	1.21	0.0454	chr19(+):44529505-44594702	UCSC	zinc finger protein 222 // zinc finger protein 223 // zinc finger protein 284	DKFZp781F1775	AK308295	342909 // 7673 // 7766	ENSG00000159885 // ENSG00000178386 // ENSG00000186026	6.7	6.42	No
GSHG0014855	CAPNS1	down	1.21	0.0441	chr19(+):36630889-36641255	UCSC	calpain, small subunit 1	CAPN4 // 30K // CANP // CANPS // CDPS	X04106	826	ENSG00000126247	9.5	9.23	Yes
GSHG0012454	RPL19	down	1.21	0.019	chr17(+):37356568-37360980	UCSC	ribosomal protein L19	DKFZp779D216 // FLJ27452 // L19 // MGC71997	AK130962	6143	ENSG00000108298	12.78	12.5	No
GSHG0011323	PDPR	down	1.21	0.0362	chr16(+):70147529-70195184	UCSC	pyruvate dehydrogenase phosphatase regulatory subunit	PDP3	BC150251	55066	ENSG00000090857	8.93	8.65	No
GSHG0011015	METTL9	down	1.21	0.00946	chr16(+):21610879-21668791	UCSC	methyltransferase like 9	DREV1	BC000195	51108	ENSG00000197006	9.69	9.42	No
GSHG0010742	---	down	1.21	0.0379	chr15(-):96702110-96702853	UCSC	---	---	AF086261	---	---	5.8	5.52	No
GSHG0033248	---	down	1.21	0.0386	chr15(-):83205507-83209293	UCSC	---	---	BC062715	---	---	11.55	11.28	Yes
GSHG0009437	PIGH	down	1.21	0.0348	chr14(-):68056030-68066984	UCSC	phosphatidylinositol glycan anchor biosynthesis, class H	GPI-H	L19783	5283	ENSG00000100564	7.81	7.53	No
GSHG0009380	GCH1	down	1.21	0.0332	chr14(-):55308734-55369534	UCSC	GTP cyclohydrolase 1	DYT14 // DYT5 // GCH // DYT5a // GTPCH1	U66097	2643	ENSG00000131979	6.48	6.2	No
GSHG0008009	GTF3A	down	1.21	0.0334	chr13(+):27998615-28009826	UCSC	general transcription factor IIIA	AP2 // TFIIIA	BC143711	2971	ENSG00000122034	9.42	9.14	Yes
GSHG0006385	---	down	1.21	0.0429	chr12(+):2956230-2959329	UCSC	---	---	AK126216	---	---	7.36	7.08	No
GSHG0000938	MRPS21	down	1.21	0.0474	chr1(+):150266275-150281414	UCSC	mitochondrial ribosomal protein S21	---	U79258	54460	ENSG00000187145	9.8	9.52	No
GSHG0005051	PPP6R3	down	1.21	0.0129	chr11(+):68228199-68382800	UCSC	protein phosphatase 6, regulatory subunit 3	C11orf23 // SAPS3 // DKFZp781E17107 // DKFZp781E2374 // DKFZp781O2362 // FLJ11058 // FLJ43065 // KIAA1558 // MGC125711 // MGC125712 // PP6R3 // SAP190 // SAPL // SAPLa	AK298180	55291	ENSG00000110075	9.71	9.44	No
GSHG0032231	ARMCX6	down	1.21	0.00138	chrX(-):100870116-100872991	UCSC	armadillo repeat containing, X-linked 6	FLJ20811	BC007677	54470	ENSG00000198960	8.44	8.16	No
GSHG0031109	MEGF9	down	1.21	0.0371	chr9(-):123363091-123476765	UCSC	multiple EGF-like-domains 9	EGFL5	AK295380	1955	ENSG00000106780	8.25	7.97	Yes
GSHG0025632	RNF5	down	1.21	0.0442	chr6(+):32146168-32151930	UCSC	ring finger protein 5	G16 // NG2 // RING5 // RMA1	AK296212	6048	---	9.05	8.77	No
GSHG0024749	TTC33	down	1.21	0.0491	chr5(-):40714578-40756062	UCSC	tetratricopeptide repeat domain 33	OSRF	BC015701	23548	ENSG00000113638	7.81	7.54	No
GSHG0022274	KLHL6	down	1.21	0.038	chr3(-):183205337-183273477	UCSC	kelch-like 6 (Drosophila)	FLJ00029	AF441792	89857	ENSG00000172578	9.04	8.76	Yes
GSHG0018655	HM13	down	1.21	0.0295	chr20(+):30102242-30157370	UCSC	histocompatibility (minor) 13	dJ324O17.1 // H13 // IMP1 // IMPAS // PSENL3 // PSL3 // SPP	BC008959	81502	ENSG00000101294	9.61	9.33	No
GSHG0014871	ZNF420	down	1.2	0.048	chr19(+):37569321-37621212	UCSC	zinc finger protein 420	FLJ32191	AK056753	147923	ENSG00000197050	7.05	6.79	Yes
GSHG0014124	TSHZ1	down	1.2	0.0447	chr18(+):72923142-73001677	UCSC	teashirt zinc finger homeobox 1	SDCCAG33 // NY-CO-33 // TSH1	AL833321	10194	ENSG00000179981	7.86	7.59	No
GSHG0013554	FAM117A	down	1.2	0.0277	chr17(-):47787687-47865937	UCSC	family with sequence similarity 117, member A	---	AK302376	81558	ENSG00000121104	9.75	9.48	Yes
GSHG0030570	MRPS2	down	1.2	0.0228	chr9(+):138392541-138396519	UCSC	mitochondrial ribosomal protein S2	CGI-91	BC008017	51116	ENSG00000122140	8.69	8.42	No
GSHG0024523	FAM153C	down	1.2	0.037	chr5(+):177433973-177476088	UCSC	family with sequence similarity 153, member C	NY-REN-7-like	AK294762	653316	ENSG00000204677	7.13	6.86	Yes
GSHG0003182	GATA3	down	1.2	0.0219	chr10(+):8096667-8116853	UCSC	GATA binding protein 3	HDR	BC006793	2625	ENSG00000107485	10.3	10.03	No
GSHG0000434	C1orf50	down	1.2	0.00244	chr1(+):43232940-43255606	UCSC	chromosome 1 open reading frame 50	MGC955	AK299874	79078	ENSG00000164008	7.35	7.08	No
GSHG0000151	---	up	2.94	0.028	chr1(+):15038134-15040271	UCSC	---	---	AK126906	---	---	5.27	6.83	Yes
GSHG0029756	---	up	2.42	0.0476	chr8(-):102193086-102195407	UCSC	---	---	BC035156	---	---	6.08	7.35	Yes
GSHG0012955	---	up	2.17	0.0333	chr17(-):1471864-1475838	UCSC	---	---	AK056769	---	---	5.93	7.05	No
GSHG0027867	---	up	2.12	0.0393	chr7(+):150038860-150039688	UCSC	---	---	AL359058	---	---	7.23	8.31	No
GSHG0002128	---	up	2.04	0.0466	chr1(-):54844988-54846746	UCSC	---	---	AK001038	---	---	7.38	8.41	No
GSHG0027133	SNORD13P2	up	2.04	0.016	chr7(+):4729060-4729264	UCSC	small nucleolar RNA, C/D box 13 pseudogene 2	RNU13P2 // U13 // U13.12A	X58060	6077	---	6.41	7.44	Yes
GSHG0014904	---	up	2.03	0.049	chr19(+):39639683-39640766	UCSC	---	---	BC032814	---	---	5.86	6.88	Yes
GSHG0019788	---	up	1.98	0.0222	chr21(-):47869250-47874074	UCSC	---	---	AK125890	---	---	6.73	7.71	No
GSHG0027132	---	up	1.97	0.0112	chr7(+):4724775-4727897	UCSC	---	---	AK126109	---	---	5.95	6.93	Yes
GSHG0018454	---	up	1.91	0.0307	chr2(-):240269223-240270844	UCSC	---	---	AK129545	---	---	6.49	7.42	No
GSHG0029895	---	up	1.88	0.0285	chr8(-):141515918-141518142	UCSC	---	---	BC043181	---	---	7.95	8.86	No
GSHG0022312	---	up	1.86	0.000935	chr3(-):187455564-187457726	UCSC	---	---	AK090890	---	---	7.61	8.51	No
GSHG0007941	---	up	1.85	0.00586	chr12(-):133198876-133199561	UCSC	---	---	BC152398	---	---	5.67	6.56	No
GSHG0020500	---	up	1.84	0.0102	chr22(-):49965912-49969074	UCSC	---	---	AK096774	---	---	7.54	8.42	No
GSHG0028044	---	up	1.83	0.0142	chr7(-):21961227-21964702	UCSC	---	---	BC032649	---	---	5.49	6.36	No
GSHG0029321	---	up	1.8	0.000721	chr8(+):145268918-145270775	UCSC	---	---	AK093585	---	---	5.59	6.43	Yes
GSHG0014492	---	up	1.79	0.0268	chr19(+):5113893-5116253	UCSC	---	---	AX747852	---	---	5.52	6.36	Yes
GSHG0032273	---	up	1.77	0.021	chrX(-):108953953-108955313	UCSC	---	---	AF090916	---	---	6.18	7.01	No
GSHG0027119	---	up	1.77	0.0299	chr7(+):2477398-2487484	UCSC	---	---	BC034268	---	---	6.94	7.76	No
GSHG0022114	---	up	1.77	0.0142	chr3(-):141663272-141666233	UCSC	---	---	BC040991	---	---	9.63	10.46	No
GSHG0016971	---	up	1.76	0.0226	chr2(+):170559598-170561296	UCSC	---	---	AK021962	---	---	5.95	6.77	Yes
GSHG0013551	---	up	1.74	0.00354	chr17(-):47673110-47674313	UCSC	---	---	BC037851	---	---	5.97	6.77	No
GSHG0001788	---	up	1.74	0.0455	chr1(-):16888923-16892211	UCSC	---	---	AF379613	---	---	4.6	5.4	No
GSHG0005022	---	up	1.74	0.0287	chr11(+):66369164-66371324	UCSC	---	---	AK127930	---	---	7.78	8.58	Yes
GSHG0027606	---	up	1.74	0.0413	chr7(+):101603396-101605155	UCSC	---	---	BC033250	---	---	6.91	7.71	No
GSHG0016219	---	up	1.74	0.0033	chr2(+):3454789-3457703	UCSC	---	---	AK094194	---	---	8.19	8.99	No
GSHG0012234	---	up	1.73	0.0175	chr17(+):11191522-11194127	UCSC	---	---	AL110201	---	---	5.16	5.95	No
GSHG0022311	BCL6	up	1.72	0.0071	chr3(-):187439172-187463475	UCSC	B-cell CLL/lymphoma 6	ZNF51 // BCL5 // BCL6A // LAZ3 // ZBTB27	U00115	604	ENSG00000113916	8.43	9.21	No
GSHG0000839	---	up	1.71	0.00394	chr1(+):116234827-116236318	UCSC	---	---	BC000907	---	---	7.27	8.04	No
GSHG0021528	---	up	1.71	0.00706	chr3(-):12948885-12949490	UCSC	---	---	AY358240	---	---	6.27	7.04	Yes
GSHG0014324	---	up	1.7	0.029	chr18(-):54266299-54268220	UCSC	---	---	BC034791	---	---	5.53	6.29	No
GSHG0029473	---	up	1.7	0.0177	chr8(-):24770546-24772230	UCSC	---	---	BC002421	---	---	6.5	7.26	No
GSHG0010801	---	up	1.69	0.0316	chr16(+):542356-543251	UCSC	---	---	BC009036	---	---	5.35	6.11	No
GSHG0033733	---	up	1.69	0.011	chr7(+):155571471-155575690	UCSC	---	---	AK055460	---	---	8.57	9.33	No
GSHG0025335	---	up	1.69	0.00866	chr5(-):179308963-179311765	UCSC	---	---	AK090555	---	---	7.59	8.34	No
GSHG0020131	---	up	1.69	0.0329	chr22(+):50295411-50298224	UCSC	---	---	AK126604	---	---	6.11	6.87	No
GSHG0019178	---	up	1.69	0.0249	chr20(-):37038940-37041070	UCSC	---	---	AK024410	---	---	5.02	5.78	No
GSHG0016996	---	up	1.69	0.0466	chr2(+):174098497-174100994	UCSC	---	---	AK055878	---	---	6.36	7.12	Yes
GSHG0012962	SLC43A2	up	1.67	0.0101	chr17(-):1477674-1532180	UCSC	solute carrier family 43, member 2	MGC34680	BC027923	124935	ENSG00000167703	8.94	9.68	No
GSHG0022381	---	up	1.65	0.0323	chr4(+):132123-135208	UCSC	---	---	AK124166	---	---	9	9.73	Yes
GSHG0022365	---	up	1.64	0.0187	chr3(-):196728614-196729319	UCSC	---	---	BC082761	---	---	5.94	6.65	No
GSHG0024226	---	up	1.63	0.0103	chr5(+):131790927-131793819	UCSC	---	---	AK025221	---	---	7.77	8.48	No
GSHG0022278	ABCC5	up	1.63	0.0192	chr3(-):183637719-183843850	UCSC	ATP-binding cassette, sub-family C (CFTR/MRP), member 5	EST277145 // MOAT-C // MRP5 // SMRP	AF146074	10057	ENSG00000114770	8.15	8.85	No
GSHG0021485	---	up	1.63	0.00786	chr3(-):5867480-5869390	UCSC	---	---	BC037877	---	---	5.46	6.17	Yes
GSHG0013513	---	up	1.62	0.0383	chr17(-):45527593-45569849	UCSC	---	---	BC067758	---	---	9.23	9.92	No
GSHG0004156	---	up	1.62	0.00556	chr10(-):74884659-74885290	UCSC	---	---	U88048	---	---	7.83	8.53	No
GSHG0022020	---	up	1.62	0.0172	chr3(-):126151643-126153414	UCSC	---	---	AK000130	---	---	6.68	7.38	No
GSHG0020763	---	up	1.62	0.0105	chr3(+):45646831-45650331	UCSC	---	---	BC069278	---	---	6.28	6.98	No
GSHG0029932	---	up	1.61	0.0159	chr8(-):144669513-144670419	UCSC	---	---	AY358690	---	---	6.69	7.38	No
GSHG0025764	TMEM63B	up	1.61	0.00514	chr6(+):44094648-44123255	UCSC	transmembrane protein 63B	C6orf110 // dJ421H19.2 // DKFZp434P0531	CR627460	55362	ENSG00000137216	7.87	8.56	No
GSHG0027954	INTS1	up	1.6	0.00954	chr7(-):1509913-1533503	UCSC	integrator complex subunit 1	DKFZp586J0619 // INT1 // KIAA1440 // NET28	AB037861	26173	ENSG00000164880	8.11	8.79	No
GSHG0027605	---	up	1.6	0.0042	chr7(+):101478282-101479964	UCSC	---	---	BC013779	---	---	8.11	8.79	Yes
GSHG0026425	GABBR1 // UBD	up	1.6	0.0267	chr6(-):29523396-29600860	UCSC	gamma-aminobutyric acid (GABA) B receptor, 1 // ubiquitin D	FAT10 // GPRC3A // hGB1a	BC051463	10537 // 2550	ENSG00000204681 // ENSG00000213886	7.94	8.62	No
GSHG0026231	---	up	1.6	0.0444	chr6(-):536199-538632	UCSC	---	---	AK098072	---	---	8.66	9.34	No
GSHG0001512	---	up	1.59	0.000565	chr1(+):228353503-228353766	UCSC	---	---	BC028052	---	---	7.34	8.02	No
GSHG0005071	---	up	1.59	0.000104	chr11(+):71214910-71216919	UCSC	---	---	BC015237	---	---	7.99	8.66	No
GSHG0027118	CHST12	up	1.59	0.0316	chr7(+):2443207-2474214	UCSC	carbohydrate (chondroitin 4) sulfotransferase 12	C4S-2 // C4ST2	BC015954	55501	ENSG00000136213	8.41	9.09	No
GSHG0020505	---	up	1.59	0.0412	chr22(-):50172328-50173958	UCSC	---	---	BC001742	---	---	7.16	7.83	No
GSHG0020414	---	up	1.59	0.0447	chr22(-):40991893-40993940	UCSC	---	---	AK025156	---	---	7.34	8	No
GSHG0017958	---	up	1.59	0.0229	chr2(-):121974169-121977560	UCSC	---	---	BC020554	---	---	6.94	7.61	No
GSHG0000154	---	up	1.58	0.0155	chr1(+):15314811-15315971	UCSC	---	---	BC014494	---	---	6.58	7.25	No
GSHG0003760	---	up	1.58	0.0153	chr10(+):126178353-126181683	UCSC	---	---	AK126796	---	---	6.05	6.71	No
GSHG0028762	VIPR2	up	1.58	0.00212	chr7(-):158820867-158937649	UCSC	vasoactive intestinal peptide receptor 2	VPAC2 // VPAC2R	X95097	7434	ENSG00000106018	8.68	9.34	No
GSHG0032547	---	up	1.58	0.0063	chr1(-):144480748-144521969	UCSC	---	---	BC089397	---	---	6.18	6.84	Yes
GSHG0010938	METTL22	up	1.57	0.014	chr16(+):8715545-8740077	UCSC	methyltransferase like 22	C16orf68 // FLJ12433 // MGC2654	BC001908	79091	ENSG00000067365	8.05	8.7	No
GSHG0006840	---	up	1.57	0.0101	chr12(+):70825516-70828074	UCSC	---	---	AK054684	---	---	7.3	7.95	No
GSHG0028450	---	up	1.57	0.0452	chr7(-):102761174-102766483	UCSC	---	---	AL832759	---	---	6.39	7.04	Yes
GSHG0016755	---	up	1.57	0.0442	chr2(+):109301048-109303694	UCSC	---	---	AK025661	---	---	7.75	8.4	No
GSHG0010240	---	up	1.55	0.0128	chr15(-):25917504-25919572	UCSC	---	---	AX747189	---	---	6.86	7.49	No
GSHG0009709	HERC2P9	up	1.55	0.00898	chr15(+):28896567-28930408	UCSC	hect domain and RLD 2 pseudogene 9	FLJ59185	BC047911	440248	ENSG00000206149	6.9	7.53	No
GSHG0000149	---	up	1.55	0.0264	chr1(+):14726838-14728734	UCSC	---	---	AK026284	---	---	6.03	6.66	No
GSHG0022951	---	up	1.55	0.0163	chr4(+):160057451-160058862	UCSC	---	---	AF143322	---	---	6.16	6.8	No
GSHG0021121	ABTB1	up	1.55	0.0258	chr3(+):127391783-127399762	UCSC	ankyrin repeat and BTB (POZ) domain containing 1	BPOZ // Btb3 // EF1ABP	BC011858	80325	ENSG00000114626	7.44	8.07	Yes
GSHG0019619	CLDN8	up	1.55	0.036	chr21(-):31585713-31588352	UCSC	claudin 8	---	AB590283	9073	ENSG00000156284	6.12	6.75	No
GSHG0006737	SUOX	up	1.54	0.0189	chr12(+):56391069-56399307	UCSC	sulfite oxidase	---	BC065193	6821	ENSG00000139531	6.59	7.21	No
GSHG0023823	FBXL7	up	1.54	0.0218	chr5(+):15500305-15939900	UCSC	F-box and leucine-rich repeat protein 7	FBL6 // FBL7 // KIAA0840	AB020647	23194	ENSG00000183580	7.14	7.77	No
GSHG0003059	---	up	1.54	0.0188	chr1(-):235270014-235271890	UCSC	---	---	AK093547	---	---	6.01	6.63	Yes
GSHG0020447	ATP5L2	up	1.54	0.0384	chr22(-):43035809-43036607	UCSC	ATP synthase, H+ transporting, mitochondrial Fo complex, subunit G2	ATP5K2 // dJ222E13.5	AF092923	267020	ENSG00000249222	6.28	6.9	No
GSHG0033682	---	up	1.54	0.024	chr21(-):47874882-47878604	UCSC	---	---	AK127572	---	---	6.72	7.34	No
GSHG0015727	---	up	1.54	0.0226	chr19(-):35302493-35305250	UCSC	---	---	BC041906	---	---	5.91	6.53	No
GSHG0012271	---	up	1.53	0.0148	chr17(+):17690209-17690783	UCSC	---	---	AF088061	---	---	6.12	6.74	No
GSHG0020706	ACVR2B	up	1.53	0.0081	chr3(+):38495810-38524867	UCSC	activin A receptor, type IIB	ActR-IIB	X77533	93	ENSG00000114739	7.42	8.03	No
GSHG0018163	---	up	1.53	0.0313	chr2(-):175410037-175411063	UCSC	---	---	BC037197	---	---	6.36	6.97	No
GSHG0017642	---	up	1.53	0.0128	chr2(-):60751633-60755350	UCSC	---	---	AL833181	---	---	8.56	9.17	No
GSHG0015601	---	up	1.52	0.0119	chr19(-):16721220-16723014	UCSC	---	---	AK026694	---	---	6.95	7.55	No
GSHG0001843	---	up	1.52	0.00942	chr1(-):23607803-23613245	UCSC	---	---	AL832122	---	---	6.82	7.43	No
GSHG0028708	---	up	1.51	0.0261	chr7(-):150377303-150381897	UCSC	---	---	BX648625	---	---	6.29	6.89	Yes
GSHG0027597	---	up	1.51	0.0155	chr7(+):100737328-100739589	UCSC	---	---	AK022020	---	---	6.66	7.26	Yes
GSHG0019728	TMPRSS3	up	1.51	0.00422	chr21(-):43791946-43816955	UCSC	transmembrane protease, serine 3	DFNB10 // DFNB8	AY633572	64699	ENSG00000160183	6.22	6.82	No
GSHG0018188	---	up	1.51	0.0245	chr2(-):179607321-179609139	UCSC	---	---	AK129912	---	---	5.04	5.64	No
GSHG0013624	---	up	1.5	0.0348	chr17(-):58211983-58213005	UCSC	---	---	AK311448	---	---	6.95	7.53	No
GSHG0010288	GOLGA8A	up	1.5	0.0303	chr15(-):34671272-34880704	UCSC	golgin A8 family, member A	GM88 // GOLGIN-67	BX648160	23015	ENSG00000175265	8.6	9.19	Yes
GSHG0026492	AGER	up	1.5	0.0215	chr6(-):32148745-32152101	UCSC	advanced glycosylation end product-specific receptor	RAGE	AK298100	177	ENSG00000204305	8.04	8.62	No
GSHG0033523	EGFL8 // PPT2	up	1.5	0.0406	chr6(+):32121301-32136062	UCSC	EGF-like-domain, multiple 8 // palmitoyl-protein thioesterase 2	C6orf8 // NG3	AF020544	80864 // 9374	ENSG00000241404	7.99	8.57	No
GSHG0002445	---	up	1.5	0.0459	chr1(-):145590675-145592337	UCSC	---	---	BC053590	---	---	7.03	7.62	No
GSHG0010212	---	up	1.49	0.0118	chr15(+):102286122-102293234	UCSC	---	---	BC101079	---	---	11.15	11.72	Yes
GSHG0008171	---	up	1.49	0.0276	chr13(+):74227541-74228677	UCSC	---	---	BC039393	---	---	6.05	6.62	No
GSHG0007100	---	up	1.49	0.0286	chr12(+):124133076-124135032	UCSC	---	---	AK127396	---	---	6.32	6.89	No
GSHG0027490	---	up	1.49	0.0184	chr7(+):86738855-86740598	UCSC	---	---	AK054776	---	---	5.98	6.56	No
GSHG0026489	ATF6B	up	1.49	0.0289	chr6(-):32050050-32096030	UCSC	activating transcription factor 6 beta	CREBL1 // G13	U52696	1388	ENSG00000213676	9.52	10.1	Yes
GSHG0033421	WDR6	up	1.49	0.00672	chr3(+):49044495-49053386	UCSC	WD repeat domain 6	---	AF099100	11180	ENSG00000178252	9.83	10.41	No
GSHG0013078	KRBA2	up	1.48	0.0164	chr17(-):8271973-8280029	UCSC	KRAB-A domain containing 2	---	BC024723	124751	ENSG00000184619	6.82	7.39	No
GSHG0010230	HERC2P2	up	1.48	0.0219	chr15(-):23282281-23378259	UCSC	hect domain and RLD 2 pseudogene 2	D15F37S3	AF041080	400322	ENSG00000140181	8.31	8.88	Yes
GSHG0033110	---	up	1.48	0.0369	chr1(+):204595903-204598840	UCSC	---	---	AK097184	---	---	7.05	7.61	Yes
GSHG0022373	---	up	1.48	0.00122	chr3(-):197360525-197361555	UCSC	---	---	BC011766	---	---	8.47	9.03	Yes
GSHG0033410	RPL32P3 // SNORA7B	up	1.48	0.0438	chr3(-):129101768-129118262	UCSC	ribosomal protein L32 pseudogene 3 // small nucleolar RNA, H/ACA box 7B	ACA7B	BC053996	132241 // 677797	ENSG00000207088 // ENSG00000251474	7.2	7.77	Yes
GSHG0018477	---	up	1.48	0.0328	chr2(-):242428943-242432702	UCSC	---	---	AK124871	---	---	7.15	7.71	No
GSHG0014482	---	up	1.47	0.0121	chr19(+):4448807-4450833	UCSC	---	---	AK126579	---	---	7.62	8.18	No
GSHG0013199	C17orf51	up	1.47	0.0267	chr17(-):21435181-21477731	UCSC	chromosome 17 open reading frame 51	FLJ12977 // FLJ31874 // FLJ33618	AX746692	339263	ENSG00000212719	6.78	7.34	No
GSHG0003698	---	up	1.47	0.0212	chr10(+):114897667-114899570	UCSC	---	---	AK026816	---	---	7.17	7.73	Yes
GSHG0003618	LINC00263	up	1.47	0.00872	chr10(+):102133349-102148114	UCSC	long intergenic non-protein coding RNA 263	C10orf75 // NCRNA00263 // bA34D15.5 // FLJ12974	BC062533	90271	ENSG00000235823	7.8	8.35	Yes
GSHG0003461	---	up	1.47	0.00408	chr10(+):76045369-76047221	UCSC	---	---	BC037826	---	---	6.48	7.04	No
GSHG0026143	---	up	1.47	0.0272	chr6(+):155271106-155278609	UCSC	---	---	BX649111	---	---	5.98	6.53	No
GSHG0022021	ZXDC	up	1.47	0.00746	chr3(-):126156444-126194762	UCSC	ZXD family zinc finger C	FLJ13861 // MGC11349	DQ079590	79364	ENSG00000070476	9.59	10.14	No
GSHG0015268	---	up	1.46	0.0102	chr19(+):58520198-58522598	UCSC	---	---	BC036750	---	---	6	6.55	No
GSHG0009159	SIVA1	up	1.46	0.00916	chr14(+):105219484-105225995	UCSC	SIVA1, apoptosis-inducing factor	CD27BP // SIVA // Siva-1 // Siva-2	AK223332	10572	ENSG00000184990	9.4	9.94	Yes
GSHG0007187	FGF23	up	1.46	0.0491	chr12(-):4477393-4488894	UCSC	fibroblast growth factor 23	---	AB047858	8074	ENSG00000118972	6.53	7.08	No
GSHG0006606	---	up	1.46	0.00478	chr12(+):46798427-46800949	UCSC	---	---	AK123910	---	---	6.46	7	No
GSHG0005963	---	up	1.46	0.024	chr11(-):67826217-67828536	UCSC	---	---	AX747648	---	---	6.29	6.83	Yes
GSHG0028868	FAM160B2	up	1.46	0.00112	chr8(+):21946714-21961890	UCSC	family with sequence similarity 160, member B2	RAI16 // FLJ21801	BC052237	64760	ENSG00000158863	7.79	8.33	No
GSHG0023683	---	up	1.46	0.0122	chr4(-):185377248-185377762	UCSC	---	---	AF075048	---	---	6.62	7.16	No
GSHG0022914	---	up	1.46	0.0189	chr4(+):152595635-152599043	UCSC	---	---	AL117437	---	---	5.67	6.21	No
GSHG0017365	ING5	up	1.46	0.014	chr2(+):242641455-242665822	UCSC	inhibitor of growth family, member 5	FLJ23842 // p28ING5	AK074422	84289	ENSG00000168395	7.51	8.06	No
GSHG0002345	---	up	1.46	0.0454	chr1(-):111478992-111484975	UCSC	---	---	BC038672	---	---	6.21	6.75	Yes
GSHG0011728	GTF3C1	up	1.45	0.048	chr16(-):27471935-27561274	UCSC	general transcription factor IIIC, polypeptide 1, alpha 220kDa	TFIIIC220	CR627430	2975	ENSG00000077235	7.06	7.59	No
GSHG0011697	---	up	1.45	0.0431	chr16(-):21805416-21807080	UCSC	---	---	AF054994	---	---	6.35	6.89	No
GSHG0008532	---	up	1.45	0.0327	chr13(-):67780303-67780880	UCSC	---	---	AF085861	---	---	6.53	7.07	Yes
GSHG0028462	---	up	1.45	0.0313	chr7(-):104622196-104625367	UCSC	---	---	AK123595	---	---	6.2	6.74	No
GSHG0026632	DLK2	up	1.45	0.00636	chr6(-):43418092-43424370	UCSC	delta-like 2 homolog (Drosophila)	EGFL9 // MGC2487	AK055380	65989	ENSG00000171462	7.87	8.42	No
GSHG0026328	---	up	1.45	0.043	chr6(-):16429675-16431507	UCSC	---	---	AK025161	---	---	7.21	7.74	No
GSHG0021723	AMIGO3 // GMPPB	up	1.45	0.0158	chr3(-):49754277-49761384	UCSC	adhesion molecule with Ig-like domain 3 // GDP-mannose pyrophosphorylase B	KIAA1851	AB058754	29925 // 386724	ENSG00000173540 // ENSG00000176020	6.95	7.5	No
GSHG0020778	NBEAL2	up	1.45	0.0196	chr3(+):47021333-47051195	UCSC	neurobeachin-like 2	KIAA0540	AK131104	23218	ENSG00000160796	8.87	9.4	No
GSHG0020509	ALG12	up	1.45	0.0169	chr22(-):50296866-50312079	UCSC	asparagine-linked glycosylation 12, alpha-1,6-mannosyltransferase homolog (S. cerevisiae)	ECM39	AF311904	79087	ENSG00000182858	7.97	8.5	No
GSHG0018891	---	up	1.45	0.0338	chr20(+):60873645-60874353	UCSC	---	---	BC009629	---	---	7.14	7.68	No
GSHG0018457	---	up	1.45	0.0286	chr2(-):240896790-240898805	UCSC	---	---	AK025576	---	---	6.18	6.71	No
GSHG0018451	HDAC4	up	1.45	0.018	chr2(-):239970382-240323346	UCSC	histone deacetylase 4	HA6116 // HD4 // HDAC-4 // HDAC-A // HDACA // KIAA0288	AB006626	9759	ENSG00000068024	8.44	8.98	No
GSHG0012546	---	up	1.44	0.0391	chr17(+):42299283-42301067	UCSC	---	---	BC050302	---	---	8.11	8.64	No
GSHG0001697	---	up	1.44	0.0305	chr1(-):3404526-3405230	UCSC	---	---	AF086414	---	---	8.03	8.55	No
GSHG0007727	---	up	1.44	0.00654	chr12(-):104154219-104157740	UCSC	---	---	AK126526	---	---	6.3	6.83	No
GSHG0001159	---	up	1.44	0.0457	chr1(+):167610578-167612392	UCSC	---	---	AK092681	---	---	7.39	7.92	Yes
GSHG0004352	---	up	1.44	0.0239	chr10(-):105401922-105408105	UCSC	---	---	CR749568	---	---	6.04	6.57	No
GSHG0003898	---	up	1.44	0.0358	chr10(-):15196721-15197346	UCSC	---	---	BC171823	---	---	7.79	8.32	No
GSHG0029296	RHPN1	up	1.44	0.0201	chr8(+):144451056-144466389	UCSC	rhophilin, Rho GTPase binding protein 1	KIAA1929 // ODF5 // RHPN	BC025767	114822	ENSG00000158106	8.07	8.59	No
GSHG0028173	---	up	1.44	0.000776	chr7(-):44998599-45000392	UCSC	---	---	AK097526	---	---	10.92	11.45	No
GSHG0027418	STAG3L4	up	1.44	0.0194	chr7(+):66767631-66790666	UCSC	stromal antigen 3-like 4	FLJ13195	AK023257	64940	ENSG00000106610	7.32	7.84	Yes
GSHG0025654	SYNGAP1 // ZBTB9	up	1.44	0.0324	chr6(+):33387847-33425318	UCSC	synaptic Ras GTPase activating protein 1 // zinc finger and BTB domain containing 9	KIAA1938 // MGC23166 // RASA5 // SYNGAP // ZNF919	AB067525	221504 // 8831	ENSG00000197283 // ENSG00000213588	7.63	8.15	No
GSHG0002121	---	up	1.43	0.0448	chr1(-):54492356-54494172	UCSC	---	---	AK057652	---	---	6.39	6.91	No
GSHG0026622	PEX6	up	1.43	0.0358	chr6(-):42931614-42946958	UCSC	peroxisomal biogenesis factor 6	PAF-2 // PXAAA1	BC033487	5190	ENSG00000124587	7.41	7.93	Yes
GSHG0033409	---	up	1.43	0.0434	chr3(-):129105760-129111373	UCSC	---	---	BX641154	---	---	7.56	8.08	No
GSHG0020440	CYP2D6	up	1.43	0.037	chr22(-):42522501-42526881	UCSC	cytochrome P450, family 2, subfamily D, polypeptide 6	CYP2D7AP // CYP2D7BP // CYP2D7P2 // CYP2D8P2 // CYP2DL1 // CPD6 // CYP2D // P450-DB1 // P450C2D	X08006	1565	ENSG00000100197	7.35	7.87	No
GSHG0033686	---	up	1.43	0.0141	chr22(-):19117793-19120555	UCSC	---	---	BC037829	---	---	6.17	6.68	No
GSHG0019779	---	up	1.43	0.00032	chr21(-):46932490-46933941	UCSC	---	---	BC023005	---	---	7.29	7.8	No
GSHG0033358	ZNF514	up	1.43	0.0355	chr2(-):95813075-95825506	UCSC	zinc finger protein 514	FLJ14457	BC068498	84874	ENSG00000144026	6.47	6.98	No
GSHG0001601	---	up	1.42	0.0436	chr1(+):246769176-246771381	UCSC	---	---	BC035193	---	---	6.37	6.88	Yes
GSHG0027572	PILRB	up	1.42	0.00388	chr7(+):99933737-99965452	UCSC	paired immunoglobin-like type 2 receptor beta	FDFACT1 // FDFACT2	AK056412	29990	ENSG00000121716	9.02	9.53	No
GSHG0022407	WHSC1	up	1.42	0.00248	chr4(+):1873036-1983930	UCSC	Wolf-Hirschhorn syndrome candidate 1	MMSET // NSD2	BC032731	7468	ENSG00000109685	9.49	10	No
GSHG0019203	SLPI	up	1.42	0.0096	chr20(-):43880879-43883205	UCSC	secretory leukocyte peptidase inhibitor	ALK1 // ALP // BLPI // HUSI // HUSI-I // WAP4 // WFDC4	BC020708	6590	ENSG00000124107	7.2	7.7	No
GSHG0002581	THBS3	up	1.42	0.0164	chr1(-):155165380-155178969	UCSC	thrombospondin 3	---	AK223278	7059	ENSG00000169231	6.73	7.24	No
GSHG0018854	TFAP2C	up	1.42	0.0264	chr20(+):55204358-55214336	UCSC	transcription factor AP-2 gamma (activating enhancer binding protein 2 gamma)	AP2-GAMMA // ERF1 // hAP-2g // TFAP2G	BC051829	7022	ENSG00000087510	6.75	7.26	No
GSHG0009173	---	up	1.41	0.0479	chr14(+):105837175-105839238	UCSC	---	---	BC082256	---	---	6.98	7.47	No
GSHG0007986	---	up	1.41	0.0415	chr13(+):24201358-24204441	UCSC	---	---	AK130472	---	---	6.21	6.71	Yes
GSHG0007165	---	up	1.41	0.0184	chr12(-):383123-386289	UCSC	---	---	AL833464	---	---	9.7	10.19	No
GSHG0028717	FASTK	up	1.41	0.00304	chr7(-):150773680-150777929	UCSC	Fas-activated serine/threonine kinase	FAST	BC039026	10922	ENSG00000164896	7.68	8.18	No
GSHG0028408	---	up	1.41	0.00714	chr7(-):99811280-99815160	UCSC	---	---	AK127069	---	---	8.22	8.72	No
GSHG0022494	---	up	1.41	0.00586	chr4(+):17629799-17635720	UCSC	---	---	BX648830	---	---	6.97	7.47	No
GSHG0017504	SLC5A6	up	1.41	0.00634	chr2(-):27422455-27435148	UCSC	solute carrier family 5 (sodium-dependent vitamin transporter), member 6	SMVT	AF069307	8884	ENSG00000138074	7.59	8.08	No
GSHG0001006	ATP8B2	up	1.4	0.021	chr1(+):154298029-154323781	UCSC	ATPase, class I, type 8B, member 2	ATPID // KIAA1137	BC140441	57198	ENSG00000143515	9.05	9.54	No
GSHG0000966	---	up	1.4	0.0394	chr1(+):152161781-152191001	UCSC	---	---	CR933683	---	---	8.81	9.29	Yes
GSHG0032984	---	up	1.4	0.0201	chrX(+):155253032-155255328	UCSC	---	---	BC029274	---	---	9.16	9.65	No
GSHG0032345	---	up	1.4	0.0312	chrX(-):133678459-133680653	UCSC	---	---	BC007360	---	---	7.56	8.04	No
GSHG0031910	TMEM187	up	1.4	0.0446	chrX(+):153238211-153248644	UCSC	transmembrane protein 187	CXorf12 // DXS9878E // ITBA1	BC008203	8269	ENSG00000177854	6.69	7.18	No
GSHG0025653	PHF1	up	1.4	0.0137	chr6(+):33378805-33384213	UCSC	PHD finger protein 1	MTF2L2	BC008834	5252	ENSG00000112511	7.62	8.11	No
GSHG0024990	---	up	1.4	0.0392	chr5(-):110018948-110022955	UCSC	---	---	BX537598	---	---	5.91	6.39	No
GSHG0022115	---	up	1.4	0.0374	chr3(-):141666275-141669388	UCSC	---	---	BX647881	---	---	9.72	10.2	No
GSHG0020501	---	up	1.4	0.0136	chr22(-):50006305-50009364	UCSC	---	---	AK128192	---	---	8.25	8.74	No
GSHG0020338	---	up	1.4	0.0191	chr22(-):33209663-33216563	UCSC	---	---	AB051444	---	---	6.81	7.3	No
GSHG0015650	LPAR2	up	1.39	0.0292	chr19(-):19734477-19739739	UCSC	lysophosphatidic acid receptor 2	EDG4 // EDG-4 // LPA2	AK123043	9170	ENSG00000064547	8.15	8.63	No
GSHG0033251	---	up	1.39	0.0277	chr16(-):86521336-86524485	UCSC	---	---	BX538111	---	---	6.13	6.61	No
GSHG0011538	C16orf79	up	1.39	0.005	chr16(-):2259254-2261011	UCSC	chromosome 16 open reading frame 79	MGC21830	BC039154	283870	ENSG00000182685	7.64	8.11	No
GSHG0007742	---	up	1.39	0.0189	chr12(-):107074537-107078478	UCSC	---	---	BC034326	---	---	6.13	6.61	No
GSHG0006570	DDX11	up	1.39	0.00582	chr12(+):31226778-31257732	UCSC	DEAD/H (Asp-Glu-Ala-Asp/His) box polypeptide 11	CHL1 // CHLR1 // KRG2	BC050069	1663	ENSG00000013573	8.47	8.94	No
GSHG0005490	CHRNA10	up	1.39	0.037	chr11(-):3686818-3692614	UCSC	cholinergic receptor, nicotinic, alpha 10	---	AF199235	57053	ENSG00000129749	7.15	7.62	No
GSHG0000789	KCNC4	up	1.39	0.0039	chr1(+):110753911-110776665	UCSC	potassium voltage-gated channel, Shaw-related subfamily, member 4	C1orf30 // HKSHIIIC // Kv3.4	AK310193	3749	ENSG00000116396	7.63	8.1	No
GSHG0003753	---	up	1.39	0.00734	chr10(+):124949873-124952689	UCSC	---	---	AK128441	---	---	7.11	7.59	No
GSHG0003451	---	up	1.39	0.0435	chr10(+):75491582-75491908	UCSC	---	---	AY661565	---	---	7.91	8.39	Yes
GSHG0026514	RXRB	up	1.39	0.0232	chr6(-):33161384-33168630	UCSC	retinoid X receptor, beta	H-2RIIBP // NR2B2 // RCoR-1	BC001167	6257	ENSG00000204231	7.7	8.18	No
GSHG0025963	---	up	1.39	0.0039	chr6(+):110757887-110758362	UCSC	---	---	AF085989	---	---	5.36	5.83	Yes
GSHG0024537	---	up	1.39	0.00577	chr5(+):179204513-179206192	UCSC	---	---	AK022183	---	---	6.67	7.14	No
GSHG0024528	ZFP2	up	1.39	0.0346	chr5(+):178322916-178360210	UCSC	zinc finger protein 2 homolog (mouse)	FLJ21628 // ZNF751	AK131367	80108	ENSG00000198939	5.97	6.45	No
GSHG0018450	---	up	1.39	0.0116	chr2(-):239928723-239931139	UCSC	---	---	BC033353	---	---	6.85	7.33	Yes
GSHG0017344	RNPEPL1	up	1.39	0.00884	chr2(+):241508104-241518148	UCSC	arginyl aminopeptidase (aminopeptidase B)-like 1	---	BC082975	57140	ENSG00000142327	7.98	8.46	No
GSHG0010989	---	up	1.38	0.0072	chr16(+):16464997-16469696	UCSC	---	---	AK310228	---	---	10.14	10.61	Yes
GSHG0004793	DGKZ	up	1.38	0.0263	chr11(+):46354455-46402104	UCSC	diacylglycerol kinase, zeta	DAGK5 // DAGK6 // DGK-ZETA // hDGKzeta	AK124594	8525	ENSG00000149091	7.99	8.46	No
GSHG0004155	---	up	1.38	0.0261	chr10(-):74857802-74861055	UCSC	---	---	AK128388	---	---	6.69	7.15	Yes
GSHG0031836	---	up	1.38	0.0292	chrX(+):135239536-135241297	UCSC	---	---	AF190162	---	---	6.29	6.75	No
GSHG0003455	KIAA0913	up	1.38	0.0265	chr10(+):75545335-75561555	UCSC	KIAA0913	4832404P21Rik	AB020720	23053	ENSG00000214655	8.42	8.88	No
GSHG0032648	---	up	1.38	0.01	chr5(+):69140570-70092798	UCSC	---	---	BC105994	---	---	12.3	12.77	Yes
GSHG0024868	ENC1	up	1.38	0.0144	chr5(-):73923235-73937249	UCSC	ectodermal-neural cortex 1 (with BTB-like domain)	NRPB // ENC-1 // KLHL37 // PIG10 // TP53I10	AF059611	8507	ENSG00000171617	6.23	6.69	No
GSHG0013489	PLEKHM1	up	1.37	0.0191	chr17(-):43513267-43568110	UCSC	pleckstrin homology domain containing, family M (with RUN domain) member 1	KIAA0356	BC064361	9842	ENSG00000225190	8.98	9.43	Yes
GSHG0013321	---	up	1.37	0.0385	chr17(-):36952425-36954624	UCSC	---	---	AK095097	---	---	6.07	6.52	Yes
GSHG0033242	---	up	1.37	0.025	chr16(+):30205213-30215627	UCSC	---	---	BC071688	---	---	8.68	9.13	Yes
GSHG0010960	SNN	up	1.37	0.00876	chr16(+):11762311-11773010	UCSC	stannin	---	BC036443	8303	ENSG00000184602	7.45	7.9	No
GSHG0010872	---	up	1.37	0.0014	chr16(+):2642513-2644569	UCSC	---	---	AX748261	---	---	6.3	6.76	No
GSHG0001700	TP73-AS1	up	1.37	0.00982	chr1(-):3652550-3663937	UCSC	TP73 antisense RNA 1 (non-protein coding)	KIAA0495 // PDAM	AB007964	57212	ENSG00000227372	7.63	8.08	No
GSHG0001358	LAX1	up	1.37	0.0404	chr1(+):203734304-203749055	UCSC	lymphocyte transmembrane adaptor 1	FLJ20340 // LAX	BC089408	54900	ENSG00000122188	8.04	8.5	No
GSHG0007519	---	up	1.37	0.00612	chr12(-):54624733-54626920	UCSC	---	---	AK055641	---	---	9	9.45	Yes
GSHG0032694	FAM156A	up	1.37	0.0096	chrX(-):52955593-53024643	UCSC	family with sequence similarity 156, member A	TMEM29 // PRO0659	BC067819	29057	ENSG00000182646	7.56	8.01	No
GSHG0033496	STAG3L1	up	1.37	0.0258	chr7(+):74988448-75026250	UCSC	stromal antigen 3-like 1	DKFZP434A0131	AK316130	54441	ENSG00000205583	10.88	11.33	Yes
GSHG0027886	CHPF2	up	1.37	0.0377	chr7(+):150929575-150935905	UCSC	chondroitin polymerizing factor 2	ChSy-3 // CSGlcA-T // KIAA1402	AK056331	54480	ENSG00000033100	7.55	8.01	No
GSHG0026025	---	up	1.37	0.0311	chr6(+):127664574-127666751	UCSC	---	---	AK055024	---	---	7.75	8.2	Yes
GSHG0020851	NISCH	up	1.37	0.0186	chr3(+):52489134-52527085	UCSC	nischarin	I-1 // IRAS // KIAA0975	AB023192	11188	ENSG00000010322	8.01	8.47	No
GSHG0017982	---	up	1.37	0.0216	chr2(-):128601127-128603261	UCSC	---	---	AK095788	---	---	7.01	7.46	No
GSHG0014547	---	up	1.36	0.0473	chr19(+):8524915-8526815	UCSC	---	---	AK055658	---	---	7.56	8	No
GSHG0014389	---	up	1.36	0.0123	chr18(-):77437287-77439359	UCSC	---	---	AK002023	---	---	6.06	6.5	Yes
GSHG0013376	KRTAP4-12	up	1.36	0.0109	chr17(-):39279474-39280465	UCSC	keratin associated protein 4-12	KAP4.12	BC101161	83755	ENSG00000213416	7.51	7.96	Yes
GSHG0013325	PLXDC1	up	1.36	0.0493	chr17(-):37219557-37309485	UCSC	plexin domain containing 1	TEM3 // TEM7	AF378753	57125	ENSG00000161381	9.11	9.55	No
GSHG0001672	SLC35E2 // SLC35E2B	up	1.36	0.0114	chr1(-):1592940-1624219	UCSC	solute carrier family 35, member E2 // solute carrier family 35, member E2B	KIAA0447	AB007916	728661 // 9906	ENSG00000189339 // ENSG00000215790	9.03	9.48	Yes
GSHG0031003	---	up	1.36	0.0493	chr9(-):99936972-100001003	UCSC	---	---	AK098764	---	---	6.01	6.45	No
GSHG0032654	GUSBP3	up	1.36	0.0233	chr5(-):68921203-69006300	UCSC	glucuronidase, beta pseudogene 3	---	BC002622	653188	ENSG00000253203	12.09	12.53	Yes
GSHG0021718	AMT	up	1.36	0.00758	chr3(-):49454212-49460012	UCSC	aminomethyltransferase	GCST // NKH	D13811	275	ENSG00000145020	7.23	7.67	No
GSHG0021567	---	up	1.36	0.0499	chr3(-):18415335-18417589	UCSC	---	---	AK093647	---	---	8.05	8.5	No
GSHG0015583	AKAP8	up	1.35	0.0384	chr19(-):15464336-15490603	UCSC	A kinase (PRKA) anchor protein 8	AKAP95 // DKFZp586B1222	Y11997	10270	ENSG00000105127	8.29	8.72	No
GSHG0015307	C19orf6	up	1.35	0.00224	chr19(-):1006168-1021141	UCSC	chromosome 19 open reading frame 6	ASBABP1 // MBRL // MGC4022	AK095756	91304	ENSG00000182087	10.4	10.84	No
GSHG0013810	---	up	1.35	0.0194	chr17(-):79218801-79221435	UCSC	---	---	BC014156	---	---	7.68	8.11	No
GSHG0010546	ANP32A-IT1	up	1.35	0.0353	chr15(-):69096160-69099440	UCSC	ANP32A intronic transcript 1 (non-protein coding)	C15orf28 // NCRNA00321 // FLJ11722 // HsT18971	AK021784	80035	---	7.49	7.92	No
GSHG0009612	C14orf64	up	1.35	0.016	chr14(-):98391975-98444461	UCSC	chromosome 14 open reading frame 64	---	BC043585	388011	ENSG00000246223	10.14	10.57	No
GSHG0009131	DYNC1H1	up	1.35	0.0113	chr14(+):102430865-102517128	UCSC	dynein, cytoplasmic 1, heavy chain 1	DNCH1 // DNCL // DNECL // DHC1 // Dnchc1 // HL-3 // p22	AB290157	1778	ENSG00000197102	9.13	9.56	No
GSHG0001514	OBSCN	up	1.35	0.0131	chr1(+):228395854-228566575	UCSC	obscurin, cytoskeletal calmodulin and titin-interacting RhoGEF	ARHGEF30 // KIAA1556 // KIAA1639 // UNC89	AJ002535	84033	ENSG00000154358	7.48	7.91	No
GSHG0001374	CDK18	up	1.35	0.00684	chr1(+):205473723-205501915	UCSC	cyclin-dependent kinase 18	PCTK3 // PCTAIRE3	BC011526	5129	ENSG00000117266	7.31	7.74	No
GSHG0006025	GDPD5	up	1.35	0.0094	chr11(-):74962939-75236867	UCSC	glycerophosphodiester phosphodiesterase domain containing 5	GDE2 // PP1665	AX747115	81544	ENSG00000158555	7.3	7.74	No
GSHG0022821	---	up	1.35	0.0146	chr4(+):122791738-122794001	UCSC	---	---	BC044923	---	---	6.29	6.73	No
GSHG0022419	HTT	up	1.35	0.000598	chr4(+):3076237-3245687	UCSC	huntingtin	HD // IT15	AB016794	3064	ENSG00000197386	7.62	8.05	No
GSHG0022404	TACC3	up	1.35	0.00245	chr4(+):1723246-1746900	UCSC	transforming, acidic coiled-coil containing protein 3	ERIC1	AK225631	10460	ENSG00000013810	8.78	9.21	No
GSHG0016688	CNNM3	up	1.35	0.0101	chr2(+):97481980-97500929	UCSC	cyclin M3	ACDP3	BC007199	26505	ENSG00000168763	8.41	8.84	No
GSHG0002075	TAL1	up	1.34	0.0152	chr1(-):47681963-47697892	UCSC	T-cell acute lymphocytic leukemia 1	TCL5 // bHLHa17 // SCL	S53245	6886	ENSG00000162367	7.64	8.06	No
GSHG0012255	UBB	up	1.34	0.0109	chr17(+):16284367-16286056	UCSC	ubiquitin B	FLJ25987 // MGC8385	BC000379	7314	ENSG00000170315	11.38	11.8	Yes
GSHG0000301	ATPIF1	up	1.34	0.0187	chr1(+):28562615-28564609	UCSC	ATPase inhibitory factor 1	ATPI // ATPIP // IP // MGC1167 // MGC8898	BC009677	93974	ENSG00000130770	9.79	10.21	Yes
GSHG0001749	MTOR	up	1.34	0.00982	chr1(-):11166593-11322600	UCSC	mechanistic target of rapamycin (serine/threonine kinase)	FRAP // FRAP1 // FRAP2 // FLJ44809 // RAFT1 // RAPT1	AK302863	2475	ENSG00000198793	8.89	9.31	No
GSHG0010638	---	up	1.34	0.0454	chr15(-):80135896-80136646	UCSC	---	---	AL109717	---	---	6.63	7.05	Yes
GSHG0001656	---	up	1.34	0.0159	chr1(-):1193438-1196954	UCSC	---	---	AK125883	---	---	7.13	7.55	No
GSHG0033193	---	up	1.34	0.0477	chr12(+):125510478-125513897	UCSC	---	---	AK025766	---	---	7.29	7.72	No
GSHG0030581	---	up	1.34	0.0155	chr9(+):139014367-139016209	UCSC	---	---	AK130201	---	---	8.49	8.91	No
GSHG0029883	---	up	1.34	0.0257	chr8(-):135804263-135810515	UCSC	---	---	AL833303	---	---	8.34	8.76	Yes
GSHG0025589	GTF2H4	up	1.34	0.0318	chr6(+):30875963-30881879	UCSC	general transcription factor IIH, polypeptide 4, 52kDa	TFB2 // TFIIH	BC016302	2968	ENSG00000213780	7.44	7.86	No
GSHG0025656	ITPR3	up	1.34	0.00476	chr6(+):33588522-33664339	UCSC	inositol 1,4,5-trisphosphate receptor, type 3	IP3R3	U01062	3710	ENSG00000096433	8.79	9.21	No
GSHG0024201	---	up	1.34	0.0143	chr5(+):126187126-126189758	UCSC	---	---	AX748201	---	---	6.49	6.92	No
GSHG0023072	LETM1	up	1.34	0.00376	chr4(-):1814760-1857974	UCSC	leucine zipper-EF-hand containing transmembrane protein 1	---	AF061025	3954	ENSG00000168924	8.65	9.07	No
GSHG0003087	---	up	1.34	0.0492	chr1(-):243219609-243265046	UCSC	---	---	AL137733	---	---	9.17	9.59	Yes
GSHG0020118	---	up	1.34	0.0322	chr22(+):47077607-47078649	UCSC	---	---	BC033170	---	---	8.07	8.48	Yes
GSHG0017997	SMPD4	up	1.34	0.0279	chr2(-):130908982-130940323	UCSC	sphingomyelin phosphodiesterase 4, neutral membrane (neutral sphingomyelinase-3)	FLJ20297 // FLJ20756 // KIAA1418 // NET13 // nSMase-3 // NSMASE3	AB037839	55627	ENSG00000136699	8.41	8.83	No
GSHG0014141	---	up	1.33	0.0445	chr18(+):77256058-77258348	UCSC	---	---	AK127538	---	---	7.26	7.67	Yes
GSHG0033243	---	up	1.33	0.0324	chr16(+):23685581-23687514	UCSC	---	---	AK055300	---	---	6.94	7.36	Yes
GSHG0007917	---	up	1.33	0.0208	chr12(-):129297749-129299295	UCSC	---	---	BC009492	---	---	9.03	9.43	Yes
GSHG0005571	---	up	1.33	0.0382	chr11(-):8633589-8635887	UCSC	---	---	AK000908	---	---	6.94	7.35	No
GSHG0005070	NADSYN1	up	1.33	0.0429	chr11(+):71164247-71212585	UCSC	NAD synthetase 1	FLJ10631	AK022436	55191	ENSG00000172890	8.76	9.17	No
GSHG0004353	---	up	1.33	0.0176	chr10(-):105573092-105574843	UCSC	---	---	AK024150	---	---	6.33	6.74	No
GSHG0032289	---	up	1.33	0.0404	chrX(-):115944899-115951828	UCSC	---	---	EF565112	---	---	7.91	8.32	Yes
GSHG0029463	---	up	1.33	0.0045	chr8(-):22863899-22876848	UCSC	---	---	BC043400	---	---	6.91	7.32	No
GSHG0032898	---	up	1.33	0.017	chr8(+):145470552-145476624	UCSC	---	---	AK124551	---	---	7.29	7.7	Yes
GSHG0028398	---	up	1.33	0.00728	chr7(-):99492585-99495140	UCSC	---	---	AK130242	---	---	6.75	7.16	No
GSHG0033493	NSUN5P1 // TRIM73	up	1.33	0.0216	chr7(+):75024337-75046070	UCSC	NOP2/Sun domain family, member 5 pseudogene 1 // tripartite motif containing 73	NSUN5B // TRIM50B // WBSCR20B	AK309306	155400 // 375593	ENSG00000178809 // ENSG00000223705	9	9.41	Yes
GSHG0027064	---	up	1.33	0.025	chr6(-):166786395-166788537	UCSC	---	---	BC063138	---	---	8.33	8.75	Yes
GSHG0033468	APBB3	up	1.33	0.0146	chr5(-):139937854-139944189	UCSC	amyloid beta (A4) precursor protein-binding, family B, member 3	FE65L2	BC013158	10307	ENSG00000113108	8.08	8.5	No
GSHG0022075	---	up	1.33	0.00378	chr3(-):133871488-133873112	UCSC	---	---	AL133627	---	---	6.85	7.26	Yes
GSHG0020300	---	up	1.33	0.0225	chr22(-):30712464-30714964	UCSC	---	---	BC007908	---	---	7.23	7.65	No
GSHG0018474	---	up	1.33	0.0439	chr2(-):242166682-242168409	UCSC	---	---	AK026138	---	---	7.02	7.43	No
GSHG0015504	TMED1	up	1.32	0.0142	chr19(-):10943121-10946954	UCSC	transmembrane emp24 protein transport domain containing 1	Il1rl1l // IL1RL1LG // MGC1270 // ST2L	U41804	11018	ENSG00000099203	6.9	7.3	No
GSHG0015183	LENG8	up	1.32	0.0178	chr19(+):54960396-54973196	UCSC	leukocyte receptor cluster (LRC) member 8	KIAA1932 // MGC40108 // pp13842	AL834532	114823	ENSG00000167615	9.34	9.75	No
GSHG0012071	PIEZO1	up	1.32	0.0279	chr16(-):88781753-88851383	UCSC	piezo-type mechanosensitive ion channel component 1	FAM38A // KIAA0233	AB384448	9780	ENSG00000103335	8.75	9.15	Yes
GSHG0011344	DHX38	up	1.32	0.0164	chr16(+):72127746-72146810	UCSC	DEAH (Asp-Glu-Ala-His) box polypeptide 38	DDX38 // hPrp16 // KIAA0224 // PRP16 // PRPF16	AK301074	9785	ENSG00000140829	7.51	7.92	No
GSHG0007176	---	up	1.32	0.011	chr12(-):2785167-2800284	UCSC	---	---	AK093746	---	---	8.54	8.94	No
GSHG0006761	LRP1	up	1.32	0.00548	chr12(+):57522276-57607123	UCSC	low density lipoprotein receptor-related protein 1	A2MR // APR // CD91 // LRP	X13916	4035	ENSG00000123384	7.48	7.88	No
GSHG0004788	MAPK8IP1	up	1.32	0.00984	chr11(+):45907202-45928015	UCSC	mitogen-activated protein kinase 8 interacting protein 1	PRKM8IP // IB1 // JIP-1 // JIP1	BC068470	9479	ENSG00000121653	8.25	8.65	Yes
GSHG0032506	RBMY1A3P	up	1.32	0.0386	chrY(-):9154670-9160483	UCSC	RNA binding motif protein, Y-linked, family 1, member A3 pseudogene	---	AF527837	286557	ENSG00000197038	7.54	7.94	No
GSHG0032440	FAM3A	up	1.32	0.0375	chrX(-):153734495-153744529	UCSC	family with sequence similarity 3, member A	2-19 // DXS560S // XAP-7	AK024601	60343	ENSG00000071889	7.62	8.02	No
GSHG0033559	---	up	1.32	0.00718	chr8(+):144787757-144790279	UCSC	---	---	BC128099	---	---	8.67	9.07	Yes
GSHG0028277	---	up	1.32	0.0216	chr7(-):74298263-74306729	UCSC	---	---	BC095487	---	---	11.61	12.01	Yes
GSHG0025286	RNF44	up	1.32	0.0189	chr5(-):175953715-175965026	UCSC	ring finger protein 44	KIAA1100	BC063297	22838	ENSG00000146083	8.56	8.96	No
GSHG0003128	SH3BP5L	up	1.32	0.04	chr1(-):249104647-249120832	UCSC	SH3-binding domain protein 5-like	KIAA1720	AK125138	80851	ENSG00000175137	7.89	8.28	Yes
GSHG0002605	SMG5	up	1.32	0.0285	chr1(-):156219017-156252620	UCSC	smg-5 homolog, nonsense mediated mRNA decay factor (C. elegans)	EST1B // KIAA1089 // LPTS-RP1 // LPTSRP1 // RP11-54H19.7 // SMG-5	BC038296	23381	ENSG00000198952	8.07	8.47	No
GSHG0017156	---	up	1.32	0.0333	chr2(+):210887131-210889246	UCSC	---	---	AK055724	---	---	7.23	7.63	No
GSHG0016780	TTL	up	1.32	0.0413	chr2(+):113239731-113290214	UCSC	tubulin tyrosine ligase	MGC46235	AB071393	150465	ENSG00000114999	7.61	8.01	No
GSHG0013154	SREBF1	up	1.31	0.0102	chr17(-):17715387-17740316	UCSC	sterol regulatory element binding transcription factor 1	bHLHd1 // SREBP-1c // SREBP1	BC057388	6720	ENSG00000072310	8.11	8.5	No
GSHG0012267	---	up	1.31	0.0472	chr17(+):17388336-17391686	UCSC	---	---	AK126922	---	---	7.8	8.19	No
GSHG0012210	CHD3	up	1.31	0.0356	chr17(+):7783688-7816073	UCSC	chromodomain helicase DNA binding protein 3	Mi-2a // Mi2-ALPHA // ZFH	BC156472	1107	ENSG00000170004	8.43	8.82	No
GSHG0011451	CDT1	up	1.31	0.00896	chr16(+):88870186-88875665	UCSC	chromatin licensing and DNA replication factor 1	DUP // RIS2	AB053172	81620	ENSG00000167513	8.41	8.8	No
GSHG0010979	---	up	1.31	0.00144	chr16(+):15188268-15203054	UCSC	---	---	AK125313	---	---	7.86	8.24	Yes
GSHG0010672	HOMER2	up	1.31	0.00628	chr15(-):83509837-83621473	UCSC	homer homolog 2 (Drosophila)	CPD // Cupidin // HOMER-2 // HOMER-2A // HOMER-2B // Vesl-2	BC012109	9455	ENSG00000103942	9.06	9.45	Yes
GSHG0009805	JMJD7-PLA2G4B // PLA2G4B	up	1.31	0.0322	chr15(+):42120283-42140353	UCSC	JMJD7-PLA2G4B readthrough // phospholipase A2, group IVB (cytosolic)	cPLA2-beta // HsT16992	AB209150	100137049 // 8681	ENSG00000168970 // ENSG00000243708	7.53	7.91	No
GSHG0008342	N6AMT2	up	1.31	0.0498	chr13(-):21296543-21348095	UCSC	N-6 adenine-specific DNA methyltransferase 2 (putative)	---	AK055408	221143	ENSG00000150456	6.04	6.43	No
GSHG0007580	AVIL	up	1.31	0.00444	chr12(-):58191437-58210254	UCSC	advillin	ADVIL // DOC6 // FLJ12386 // p92	AK314362	10677	ENSG00000135407	6.83	7.23	No
GSHG0007508	MAP3K12	up	1.31	0.00166	chr12(-):53874274-53893445	UCSC	mitogen-activated protein kinase kinase kinase 12	ZPK // DLK // MEKK12 // MUK // ZPKP1	BC050050	7786	ENSG00000139625	7.19	7.57	No
GSHG0004993	---	up	1.31	0.025	chr11(+):65392598-65394250	UCSC	---	---	AK308625	---	---	8.71	9.1	No
GSHG0032992	DHRSX // ZBED1	up	1.31	0.0383	chrX(-):2404477-2419008	UCSC	dehydrogenase/reductase (SDR family) X-linked // zinc finger, BED-type containing 1	ALTE // DHRS5X // DHRS5Y // DHRSXY // DHRSY // DREF // hDREF // KIAA0785 // SDR46C1 // TRAMP	AB018328	207063 // 9189	ENSG00000169084 // ENSG00000214717	8.16	8.55	No
GSHG0028561	IMPDH1	up	1.31	0.0115	chr7(-):128032332-128050306	UCSC	IMP (inosine 5'-monophosphate) dehydrogenase 1	RP10 // LCA11 // sWSS2608	J05272	3614	ENSG00000106348	7.36	7.75	No
GSHG0028247	---	up	1.31	0.0361	chr7(-):70595906-70598300	UCSC	---	---	AK096991	---	---	6.55	6.94	No
GSHG0025045	---	up	1.31	0.046	chr5(-):131646997-131705609	UCSC	---	---	BC043424	---	---	7.12	7.51	Yes
GSHG0024224	C5orf56	up	1.31	0.0026	chr5(+):131746673-131822549	UCSC	chromosome 5 open reading frame 56	---	AK309191	441108	ENSG00000197536	8.6	9	No
GSHG0022403	CRIPAK	up	1.31	0.00968	chr4(+):1385340-1389776	UCSC	cysteine-rich PAK1 inhibitor	FLJ34443	AK126919	285464	ENSG00000179979	7.39	7.78	No
GSHG0000451	ST3GAL3	up	1.31	0.0322	chr1(+):44171493-44396830	UCSC	ST3 beta-galactoside alpha-2,3-sialyltransferase 3	SIAT6	AY051143	6487	ENSG00000126091	8.7	9.09	No
GSHG0021368	YEATS2	up	1.31	0.00818	chr3(+):183415606-183530412	UCSC	YEATS domain containing 2	FLJ10201 // FLJ12841 // FLJ13308 // KIAA1197	BC150273	55689	ENSG00000163872	9.09	9.48	No
GSHG0020772	LUZP3P	up	1.31	0.0229	chr3(+):46598888-46601178	UCSC	leucine zipper protein 3, pseudogene	LUZP3 // LUZPP1	AJ312775	83598	---	6.09	6.48	No
GSHG0020575	---	up	1.31	0.00768	chr3(+):10028594-10046928	UCSC	---	---	AX747493	---	---	8.26	8.65	No
GSHG0020135	TRABD	up	1.31	0.0444	chr22(+):50624347-50638027	UCSC	TraB domain containing	PP2447	BC093029	80305	ENSG00000170638	9.45	9.84	Yes
GSHG0019133	---	up	1.31	0.0231	chr20(-):33383832-33385965	UCSC	---	---	AK094327	---	---	6.84	7.23	No
GSHG0017494	GPR113	up	1.31	0.00722	chr2(-):26531041-26569685	UCSC	G protein-coupled receptor 113	hGPCR37 // PGR23	AK122995	165082	ENSG00000173567	7.31	7.7	No
GSHG0016795	---	up	1.31	0.0133	chr2(+):113963503-113966973	UCSC	---	---	AK123617	---	---	7.51	7.89	No
GSHG0014841	---	up	1.3	0.032	chr19(+):36208921-36229779	UCSC	---	---	AJ007041	---	---	7.51	7.89	No
GSHG0013832	---	up	1.3	0.0323	chr17(-):79876147-79878155	UCSC	---	---	AK130699	---	---	7.86	8.23	No
GSHG0013001	ATP2A3	up	1.3	0.0195	chr17(-):3827169-3867758	UCSC	ATPase, Ca++ transporting, ubiquitous	SERCA3	Z69881	489	ENSG00000074370	10.27	10.65	No
GSHG0011141	KIAA0664L3	up	1.3	0.0323	chr16(+):31711914-31718743	UCSC	KIAA0664-like 3	C16orf67 // KIAA0664P3 // MGC3020	AK054698	100132341	ENSG00000131797	8.85	9.22	No
GSHG0008106	---	up	1.3	0.0157	chr13(+):49000942-49003725	UCSC	---	---	AK097860	---	---	8.19	8.57	Yes
GSHG0006344	IGSF9B	up	1.3	0.0275	chr11(-):133785186-133807995	UCSC	immunoglobulin superfamily, member 9B	KIAA1030	AK097578	22997	ENSG00000080854	7.39	7.77	No
GSHG0004970	SAC3D1	up	1.3	5.57e-05	chr11(+):64808425-64812299	UCSC	SAC3 domain containing 1	HSU79266 // SHD1	BC007448	29901	ENSG00000168061	7.05	7.43	No
GSHG0003346	AGAP10	up	1.3	0.0401	chr10(+):48185848-48237586	UCSC	ArfGAP with GTPase domain, ankyrin repeat and PH domain 10	CTGLF7 // bA144G6.2	BC075841	728127	ENSG00000204172	9.13	9.51	Yes
GSHG0031393	CA5BP1	up	1.3	0.00312	chrX(+):15721015-15721483	UCSC	carbonic anhydrase VB pseudogene 1	CA5BL // CA5BP // PRO2325	BC021816	340591	ENSG00000186312	7.27	7.65	No
GSHG0030756	AQP3	up	1.3	0.02	chr9(-):33441154-33447594	UCSC	aquaporin 3 (Gill blood group)	GIL	AK095363	360	ENSG00000165272	8.38	8.75	No
GSHG0027596	TRIM56	up	1.3	0.0403	chr7(+):100728720-100735008	UCSC	tripartite motif containing 56	RNF109	BC011882	81844	ENSG00000169871	7.8	8.18	No
GSHG0027569	PVRIG // STAG3	up	1.3	0.0087	chr7(+):99775346-99819113	UCSC	poliovirus receptor related immunoglobulin domain containing // stromal antigen 3	C7orf15 // MGC2463	AJ007798	10734 // 79037	ENSG00000066923 // ENSG00000213413	7	7.37	No
GSHG0027324	AEBP1	up	1.3	0.0392	chr7(+):44143960-44154162	UCSC	AE binding protein 1	ACLP	BC038588	165	ENSG00000106624	10.08	10.46	No
GSHG0026548	---	up	1.3	0.0442	chr6(-):35194280-35196046	UCSC	---	---	AK124068	---	---	7.44	7.82	No
GSHG0026407	---	up	1.3	0.0191	chr6(-):28083683-28084323	UCSC	---	---	AX721103	---	---	6.66	7.04	No
GSHG0020519	SBF1	up	1.3	0.0254	chr22(-):50885235-50913464	UCSC	SET binding factor 1	MTMR5	AK057985	6305	ENSG00000100241	8.43	8.81	No
GSHG0018671	---	up	1.3	0.0417	chr20(+):31097762-31108088	UCSC	---	---	AK097865	---	---	7.09	7.46	No
GSHG0017746	AUP1	up	1.3	0.0311	chr2(-):74753580-74756887	UCSC	ancient ubiquitous protein 1	---	EU831868	550	ENSG00000115307	9.19	9.56	No
GSHG0015010	---	up	1.29	0.0098	chr19(+):45632292-45641091	UCSC	---	---	AK126781	---	---	6.93	7.3	No
GSHG0014843	C19orf55	up	1.29	0.00342	chr19(+):36249080-36261790	UCSC	chromosome 19 open reading frame 55	FLJ30657	AK055219	148137	ENSG00000167595	7.8	8.17	No
GSHG0012826	---	up	1.29	0.0342	chr17(+):73792290-73795146	UCSC	---	---	BC047422	---	---	6.6	6.96	No
GSHG0001937	---	up	1.29	0.00744	chr1(-):32826872-32829824	UCSC	---	---	AK125095	---	---	7.69	8.05	No
GSHG0011649	PLA2G10	up	1.29	0.033	chr16(-):14766407-14788526	UCSC	phospholipase A2, group X	GXPLA2	U95301	8399	ENSG00000069764	8.22	8.6	Yes
GSHG0010711	---	up	1.29	0.0211	chr15(-):90191734-90198682	UCSC	---	---	BC042063	---	---	7.73	8.1	No
GSHG0009479	PNMA1	up	1.29	0.0319	chr14(-):74178486-74180958	UCSC	paraneoplastic antigen MA1	MA1	AF037364	9240	ENSG00000176903	7.46	7.83	No
GSHG0001525	GALNT2	up	1.29	0.00794	chr1(+):230193536-230417865	UCSC	UDP-N-acetyl-alpha-D-galactosamine:polypeptide N-acetylgalactosaminyltransferase 2 (GalNAc-T2)	GalNAc-T2	AK300453	2590	ENSG00000143641	8.59	8.95	No
GSHG0007229	---	up	1.29	0.0465	chr12(-):8536702-8549091	UCSC	---	---	BC044942	---	---	6.52	6.88	No
GSHG0004505	TMEM80	up	1.29	0.0212	chr11(+):695643-705028	UCSC	transmembrane protein 80	FLJ38216	AK302585	283232	ENSG00000177042	8.87	9.23	No
GSHG0004491	---	up	1.29	0.0341	chr11(+):318653-325629	UCSC	---	---	BC040735	---	---	7.36	7.73	No
GSHG0000036	ATAD3A	up	1.29	0.0151	chr1(+):1390597-1470067	UCSC	ATPase family, AAA domain containing 3A	FLJ10709	AK001571	55210	ENSG00000197785	7.46	7.83	No
GSHG0025528	---	up	1.29	0.0431	chr6(+):27729282-27731046	UCSC	---	---	AK130456	---	---	7.47	7.83	No
GSHG0021750	RRP9	up	1.29	0.00106	chr3(-):51967446-51975957	UCSC	ribosomal RNA processing 9, small subunit (SSU) processome component, homolog (yeast)	RNU3IP2 // U3-55K	BC021032	9136	ENSG00000114767	7.96	8.32	No
GSHG0020105	---	up	1.29	0.00266	chr22(+):46509743-46514897	UCSC	---	---	AK127117	---	---	6.98	7.34	No
GSHG0018357	ABCB6 // ATG9A	up	1.29	0.0388	chr2(-):220074494-220094353	UCSC	ATP-binding cassette, sub-family B (MDR/TAP), member 6 // ATG9 autophagy related 9 homolog A (S. cerevisiae)	APG9L1 // EST45597 // FLJ22169 // MTABC3 // umat	AB209054	10058 // 79065	ENSG00000115657 // ENSG00000198925	8	8.36	No
GSHG0013341	MED24	up	1.28	0.0024	chr17(-):38175351-38210661	UCSC	mediator complex subunit 24	CRSP4 // THRAP4 // CRSP100 // DRIP100 // KIAA0130 // TRAP100	AK291040	9862	ENSG00000008838	8.77	9.12	No
GSHG0032592	CCL3L1 // CCL3L3	up	1.28	0.00894	chr17(-):34522262-34524161	UCSC	chemokine (C-C motif) ligand 3-like 1 // chemokine (C-C motif) ligand 3-like 3	D17S1718 // SCYA3L // SCYA3L1 // G0S19-2 // LD78BETA // MGC12815	BC107710	414062 // 6349	ENSG00000205021 // ENSG00000256515	7.15	7.51	Yes
GSHG0001925	FABP3	up	1.28	0.0214	chr1(-):31838501-31845892	UCSC	fatty acid binding protein 3, muscle and heart (mammary-derived growth inhibitor)	FABP11 // MDGI // H-FABP // O-FABP	Y10255	2170	ENSG00000121769	5.94	6.3	No
GSHG0011925	PSMB10	up	1.28	0.00778	chr16(-):67968412-67970769	UCSC	proteasome (prosome, macropain) subunit, beta type, 10	MECL1 // beta2i // LMP10 // MGC1665	AK225658	5699	ENSG00000205220	7.53	7.89	No
GSHG0011474	ZNF276	up	1.28	0.0372	chr16(+):89786808-89806310	UCSC	zinc finger protein 276	ZFP276 // CENP-Z // CENPZ // MGC45417 // ZNF477	AK056405	92822	ENSG00000158805	7.71	8.06	Yes
GSHG0010764	PRKXP1	up	1.28	0.00504	chr15(-):101094042-101094677	UCSC	protein kinase, X-linked, pseudogene 1	---	Y10483	441733	ENSG00000259205	12.95	13.3	No
GSHG0008744	REC8	up	1.28	0.00218	chr14(+):24641102-24649462	UCSC	REC8 homolog (yeast)	REC8L1 // Rec8p	AK291191	9985	ENSG00000100918	8.18	8.54	No
GSHG0006008	UCP3	up	1.28	0.0142	chr11(-):73711334-73720130	UCSC	uncoupling protein 3 (mitochondrial, proton carrier)	SLC25A9	BC008392	7352	ENSG00000175564	6.72	7.08	No
GSHG0005073	KRTAP5-8	up	1.28	0.0121	chr11(+):71249071-71250095	UCSC	keratin associated protein 5-8	KRTAP5-2 // KRTAP5.8 // UHSKerB	AB126077	57830	ENSG00000241233	8.65	9	No
GSHG0004553	ART1	up	1.28	0.0396	chr11(+):3666361-3685646	UCSC	ADP-ribosyltransferase 1	ART2 // CD296	S74683	417	ENSG00000129744	6.89	7.24	No
GSHG0031177	ST6GALNAC6	up	1.28	0.00298	chr9(-):130647600-130667627	UCSC	ST6 (alpha-N-acetyl-neuraminyl-2,3-beta-galactosyl-1,3)-N-acetylgalactosaminide alpha-2,6-sialyltransferase 6	SIAT7F // ST6GALNACVI	AY358672	30815	ENSG00000160408	8.21	8.56	No
GSHG0030147	FAM27A	up	1.28	0.0367	chr9(+):45727107-45728273	UCSC	family with sequence similarity 27, member A	bA7G23.5 // FAM27A1	BC002886	548321	ENSG00000182368	7.2	7.56	Yes
GSHG0030506	METTL11A	up	1.28	0.0182	chr9(+):132388430-132398410	UCSC	methyltransferase like 11A	C9orf32 // AD-003	AK298840	28989	ENSG00000148335	8.08	8.44	No
GSHG0029323	HSF1	up	1.28	0.00622	chr8(+):145515280-145538382	UCSC	heat shock transcription factor 1	HSTF1	M64673	3297	ENSG00000185122	7.84	8.2	No
GSHG0029317	MAF1	up	1.28	0.00622	chr8(+):145159402-145162515	UCSC	MAF1 homolog (S. cerevisiae)	DKFZp586G1123	BC031273	84232	ENSG00000179632	7.95	8.3	No
GSHG0026182	---	up	1.28	0.0175	chr6(+):160529651-160532532	UCSC	---	---	BC010121	---	---	6.97	7.33	No
GSHG0025542	ZNF192P1	up	1.28	0.036	chr6(+):28129570-28131289	UCSC	zinc finger protein 192 pseudogene 1	ZNF389 // dJ265C24.4 // ZNF389P	AK311106	651302	ENSG00000226314	6.53	6.89	Yes
GSHG0025302	FAM193B	up	1.28	0.019	chr5(-):176946789-176981538	UCSC	family with sequence similarity 193, member B	FLJ10404 // KIAA1931	AB067518	54540	ENSG00000146067	8.11	8.46	No
GSHG0022387	PIGG	up	1.28	0.0404	chr4(+):492998-533981	UCSC	phosphatidylinositol glycan anchor biosynthesis, class G	FLJ20265 // GPI7 // LAS21	AK074815	54872	ENSG00000174227	7.71	8.06	No
GSHG0022375	KIAA0226	up	1.28	0.0119	chr3(-):197398856-197476259	UCSC	KIAA0226	rubicon // rundataxin	D86979	9711	ENSG00000145016	7.65	8.01	No
GSHG0019336	ARFRP1	up	1.28	0.0119	chr20(-):62330003-62339268	UCSC	ADP-ribosylation factor related protein 1	ARL18 // ARP // Arp1	AK095962	10139	ENSG00000101246	7.68	8.04	No
GSHG0033394	SRC	up	1.28	0.0447	chr20(+):35973088-36011192	UCSC	v-src sarcoma (Schmidt-Ruppin A-2) viral oncogene homolog (avian)	SRC1 // ASV // c-src	AF272982	6714	ENSG00000197122	8.04	8.39	No
GSHG0000035	ATAD3B	up	1.28	0.0287	chr1(+):1407143-1433231	UCSC	ATPase family, AAA domain containing 3B	KIAA1273 // TOB3	AK290586	83858	ENSG00000160072	8.07	8.43	Yes
GSHG0014429	DAZAP1	up	1.27	0.00246	chr19(+):1407665-1435680	UCSC	DAZ associated protein 1	MGC19907	AF181719	26528	ENSG00000071626	8.79	9.14	No
GSHG0011978	---	up	1.27	0.0449	chr16(-):74366306-74402138	UCSC	---	---	BC037579	---	---	9.77	10.11	Yes
GSHG0011740	SULT1A1	up	1.27	0.0252	chr16(-):28616530-28634874	UCSC	sulfotransferase family, cytosolic, 1A, phenol-preferring, member 1	STP // STP1 // P-PST	BC048316	6817	ENSG00000196502	8.52	8.86	Yes
GSHG0001812	---	up	1.27	0.0107	chr1(-):19677793-19680717	UCSC	---	---	AK130267	---	---	6.1	6.44	No
GSHG0011176	ADCY7	up	1.27	0.0239	chr16(+):50300462-50352043	UCSC	adenylate cyclase 7	AC7 // KIAA0037	AK093706	113	ENSG00000121281	7.64	7.98	No
GSHG0005926	SLC29A2	up	1.27	0.00384	chr11(-):66129993-66139645	UCSC	solute carrier family 29 (nucleoside transporters), member 2	ENT2 // HNP36 // DER12	AK057041	3177	ENSG00000174669	7.71	8.06	No
GSHG0005086	INPPL1	up	1.27	0.0416	chr11(+):71935820-71950149	UCSC	inositol polyphosphate phosphatase-like 1	SHIP2	Y14385	3636	ENSG00000165458	8.03	8.38	Yes
GSHG0004511	PNPLA2	up	1.27	0.0301	chr11(+):818901-825569	UCSC	patatin-like phospholipase domain containing 2	ATGL // desnutrin // FP17548 // TTS-2.2	HQ651812	57104	ENSG00000177666	8.68	9.03	Yes
GSHG0030548	C9orf7	up	1.27	0.0393	chr9(+):136325089-136335970	UCSC	chromosome 9 open reading frame 7	D9S2135 // flower	AK074852	11094	ENSG00000160325	7.87	8.22	No
GSHG0028881	KIAA1967	up	1.27	0.00186	chr8(+):22462270-22477981	UCSC	KIAA1967	DBC-1 // DBC1 // NET35	AK095712	57805	ENSG00000158941	8.44	8.79	No
GSHG0028172	PURB	up	1.27	0.0049	chr7(-):44923869-44924966	UCSC	purine-rich element binding protein B	PURBETA	AY039216	5814	ENSG00000146676	7.85	8.19	No
GSHG0026445	DHX16	up	1.27	0.031	chr6(-):30620907-30640824	UCSC	DEAH (Asp-Glu-Ala-His) box polypeptide 16	DDX16 // DBP2 // Prp2 // PRPF2	AK302721	8449	ENSG00000204560	7.67	8.01	No
GSHG0025106	---	up	1.27	0.0308	chr5(-):138722657-138725770	UCSC	---	---	AK292706	---	---	10.4	10.74	No
GSHG0025047	IRF1	up	1.27	0.0438	chr5(-):131746689-131826465	UCSC	interferon regulatory factor 1	MAR	AF086145	3659	ENSG00000125347	7.84	8.18	No
GSHG0022394	TMEM175	up	1.27	0.0471	chr4(+):926220-952441	UCSC	transmembrane protein 175	MGC4618	BC047738	84286	ENSG00000127419	7.97	8.32	No
GSHG0020219	PI4KAP1 // PI4KAP2	up	1.27	0.0202	chr22(-):21827289-21871803	UCSC	phosphatidylinositol 4-kinase, catalytic, alpha pseudogene 1 // phosphatidylinositol 4-kinase, catalytic, alpha pseudogene 2	---	AK298744	375133 // 728233	ENSG00000183506 // ENSG00000215513	10.21	10.55	Yes
GSHG0019438	---	up	1.27	0.012	chr21(+):35321230-35336260	UCSC	---	---	AK127913	---	---	7.68	8.02	Yes
GSHG0002553	DENND4B	up	1.27	0.0152	chr1(-):153901977-153919154	UCSC	DENN/MADD domain containing 4B	KIAA0476	AB007945	9909	ENSG00000198837	7.91	8.25	No
GSHG0033265	---	up	1.26	0.0065	chr16(-):15198171-15458487	UCSC	---	---	BC008178	---	---	10.53	10.86	Yes
GSHG0010661	GOLGA6L5 // GOLGA6L10	up	1.26	0.0314	chr15(-):83011386-83018160	UCSC	golgin A6 family-like 5 (pseudogene) // golgin A6 family-like 10	FLJ35171 // FLJ40113 // GOLGA6L8	AK097432	374650 // 647042	ENSG00000205281	9.28	9.61	No
GSHG0001658	CPSF3L	up	1.26	0.0309	chr1(-):1246978-1260051	UCSC	cleavage and polyadenylation specific factor 3-like	CPSF73L // FLJ20542 // INT11 // INTS11 // RC-68	AL136813	54973	ENSG00000127054	8.45	8.78	No
GSHG0007091	ARL6IP4 // OGFOD2	up	1.26	0.0393	chr12(+):123459250-123467456	UCSC	ADP-ribosylation-like factor 6 interacting protein 4 // 2-oxoglutarate and iron-dependent oxygenase domain containing 2	FLJ13491 // FLJ37501 // SFRS20 // SR-25 // SRp25 // SRrp37	AK074098	51329 // 79676	ENSG00000111325 // ENSG00000182196	7.36	7.69	No
GSHG0000793	RBM15	up	1.26	0.0435	chr1(+):110881128-110909494	UCSC	RNA binding motif protein 15	OTT // OTT1	AB209680	64783	ENSG00000162775	9.08	9.42	No
GSHG0000773	CYB561D1	up	1.26	0.0363	chr1(+):110036701-110043062	UCSC	cytochrome b-561 domain containing 1	FLJ39035 // FLJ44753	BX647509	284613	ENSG00000174151	6.89	7.22	No
GSHG0029953	CPSF1	up	1.26	0.00754	chr8(-):145618447-145634709	UCSC	cleavage and polyadenylation specific factor 1, 160kDa	---	U37012	29894	ENSG00000071894	9.22	9.55	No
GSHG0000483	FAAH	up	1.26	0.021	chr1(+):46859988-46879520	UCSC	fatty acid amide hydrolase	FAAH-1	U82535	2166	ENSG00000117480	6.94	7.28	No
GSHG0023728	CEP72	up	1.26	0.00954	chr5(+):612461-653664	UCSC	centrosomal protein 72kDa	FLJ10565 // KIAA1519	AK001427	55722	ENSG00000112877	8.01	8.34	No
GSHG0023648	---	up	1.26	0.029	chr4(-):174053084-174090803	UCSC	---	---	BC040577	---	---	7.65	7.98	No
GSHG0023077	MXD4	up	1.26	0.0285	chr4(-):2249160-2263823	UCSC	MAX dimerization protein 4	bHLHc12 // MAD4 // MST149 // MSTP149	AF082740	10608	ENSG00000123933	7.6	7.93	No
GSHG0020878	FLNB	up	1.26	0.0454	chr3(+):57994125-58157975	UCSC	filamin B, beta	FLN1L // LRS1 // ABP-278 // FH1 // TABP // TAP	AF043045	2317	ENSG00000136068	7.22	7.55	No
GSHG0020848	GLYCTK	up	1.26	0.0291	chr3(+):52321836-52327493	UCSC	glycerate kinase	HBEBP2 // HBEBP4	AF448855	132158	ENSG00000168237	7.03	7.37	No
GSHG0020805	TCTA	up	1.26	0.0256	chr3(+):49449639-49453908	UCSC	T-cell leukemia translocation altered gene	---	L41143	6988	ENSG00000145022	7.48	7.81	No
GSHG0020787	DHX30	up	1.26	0.0177	chr3(+):47844617-47891682	UCSC	DEAH (Asp-Glu-Ala-His) box polypeptide 30	DDX30 // FLJ11214 // KIAA0890	BC028405	22907	ENSG00000132153	8.67	9	No
GSHG0018384	IRS1	up	1.26	0.0354	chr2(-):227599765-227664475	UCSC	insulin receptor substrate 1	HIRS-1	S62539	3667	ENSG00000169047	7.37	7.7	No
GSHG0033342	SHANK1	up	1.26	0.018	chr19(-):51165084-51220195	UCSC	SH3 and multiple ankyrin repeat domains 1	SPANK-1 // SSTRIP // synamon	AF163302	50944	ENSG00000161681	8.73	9.06	No
GSHG0013664	PLEKHM1P	up	1.25	0.0117	chr17(-):62745781-62833272	UCSC	pleckstrin homology domain containing, family M (with RUN domain) member 1 pseudogene	LOC440456	BC041324	440456	ENSG00000159266	9.75	10.08	Yes
GSHG0012636	RSAD1	up	1.25	0.0308	chr17(+):48556190-48563336	UCSC	radical S-adenosyl methionine domain containing 1	FLJ11164	AK002026	55316	ENSG00000136444	7.83	8.16	No
GSHG0011536	PKD1	up	1.25	0.0353	chr16(-):2138711-2185899	UCSC	polycystic kidney disease 1 (autosomal dominant)	PBP // Pc-1 // TRPP1	L33243	5310	ENSG00000008710	7.69	8.01	No
GSHG0011101	INO80E	up	1.25	0.00726	chr16(+):30007531-30017114	UCSC	INO80 complex subunit E	CCDC95 // FLJ90652	AK075133	283899	ENSG00000169592	8.05	8.37	Yes
GSHG0011086	SNX29P1 // SNX29P2	up	1.25	0.0227	chr16(+):29262829-29519816	UCSC	sorting nexin 29 pseudogene 1 // sorting nexin 29 pseudogene 2	RUNDC2B // RUNDC2C	AK023827	100652781 // 400509 // 440352	ENSG00000158482 // ENSG00000198106	7.53	7.85	Yes
GSHG0010791	ITFG3	up	1.25	0.0368	chr16(+):284800-319942	UCSC	integrin alpha FG-GAP repeat containing 3	C16orf9 // DKFZP761D0211 // FLJ32603	AK294581	83986	ENSG00000167930	8.11	8.42	No
GSHG0009707	---	up	1.25	0.0118	chr15(+):28834638-28836269	UCSC	---	---	AK311660	---	---	10.19	10.5	Yes
GSHG0007884	---	up	1.25	0.00154	chr12(-):123506062-123508317	UCSC	---	---	AK097868	---	---	8.18	8.5	No
GSHG0007206	ACRBP // LPAR5	up	1.25	0.0294	chr12(-):6728001-6756598	UCSC	acrosin binding protein // lysophosphatidic acid receptor 5	GPR92 // GPR93 // CT23 // KPG_010 // LPA5 // OY-TES-1 // SP32	AK302786	57121 // 84519	ENSG00000111644 // ENSG00000184574	7.39	7.72	Yes
GSHG0001102	USP21	up	1.25	0.016	chr1(+):161129282-161135507	UCSC	ubiquitin specific peptidase 21	USP23 // USP16	AB208899	27005	ENSG00000143258	8.24	8.57	No
GSHG0001009	CHRNB2	up	1.25	0.00942	chr1(+):154540257-154549083	UCSC	cholinergic receptor, nicotinic, beta 2 (neuronal)	---	U62437	1141	ENSG00000160716	7.09	7.41	No
GSHG0005484	OSBPL5	up	1.25	0.0397	chr11(-):3108346-3187969	UCSC	oxysterol binding protein-like 5	KIAA1534 // ORP5	AK056510	114879	ENSG00000021762	8.76	9.08	No
GSHG0005021	CCS	up	1.25	0.0323	chr11(+):66360669-66373489	UCSC	copper chaperone for superoxide dismutase	---	AY113179	9973	ENSG00000173992	7.66	7.98	No
GSHG0000794	---	up	1.25	0.013	chr1(+):110911021-110915625	UCSC	---	---	AK125665	---	---	7.93	8.25	No
GSHG0031934	---	up	1.25	0.00612	chrX(+):154354850-154357244	UCSC	---	---	AK095886	---	---	6.73	7.06	Yes
GSHG0030784	FAM214B	up	1.25	0.0409	chr9(-):35104109-35115906	UCSC	family with sequence similarity 214, member B	KIAA1539 // bA182N22.6 // FLJ11560	BC004406	80256	ENSG00000005238	7.54	7.86	No
GSHG0029960	RECQL4	up	1.25	0.0067	chr8(-):145736667-145743229	UCSC	RecQ protein-like 4	RecQ4	BC020496	9401	ENSG00000160957	8.39	8.72	No
GSHG0027883	ABCB8 // ACCN3	up	1.25	0.0164	chr7(+):150725510-150749840	UCSC	ATP-binding cassette, sub-family B (MDR/TAP), member 8 // amiloride-sensitive cation channel 3	ASIC3 // DRASIC // EST328128 // M-ABC1 // MABC1 // TNaC1	AK128129	11194 // 9311	ENSG00000197150 // ENSG00000213199	7.72	8.04	No
GSHG0022447	MAN2B2	up	1.25	0.0226	chr4(+):6576901-6625077	UCSC	mannosidase, alpha, class 2B, member 2	KIAA0935	BC094773	23324	ENSG00000013288	7.78	8.1	No
GSHG0021771	ITIH4 // MUSTN1 // TMEM110	up	1.25	0.0482	chr3(-):52847286-52931547	UCSC	inter-alpha-trypsin inhibitor heavy chain family, member 4 // musculoskeletal, embryonic nuclear protein 1 // transmembrane protein 110	ITIHL1 // H4P // IHRP // MGC52022 // Mustang	BC047015	3700 // 375346 // 389125	ENSG00000055955 // ENSG00000213533 // ENSG00000243696	7.09	7.41	No
GSHG0021143	IFT122	up	1.25	0.0244	chr3(+):129158968-129239198	UCSC	intraflagellar transport 122 homolog (Chlamydomonas)	WDR10 // SPG // WDR10p // WDR140	AK022525	55764	ENSG00000163913	7.87	8.19	No
GSHG0020178	DGCR2	up	1.25	0.00196	chr22(-):19023797-19109962	UCSC	DiGeorge syndrome critical region gene 2	DGS-C // IDD // KIAA0163 // LAN // SEZ-12	BC040500	9993	ENSG00000070413	8.24	8.55	No
GSHG0019154	---	up	1.25	0.0448	chr20(-):34637655-34638882	UCSC	---	---	BC031254	---	---	8.8	9.12	Yes
GSHG0017774	GGCX	up	1.25	0.0493	chr2(-):85776193-85788639	UCSC	gamma-glutamyl carboxylase	VKCFD1	BC013979	2677	ENSG00000115486	7.21	7.53	No
GSHG0017209	ZFAND2B	up	1.25	0.0361	chr2(+):220071515-220074369	UCSC	zinc finger, AN1-type domain 2B	AIRAPL	AX746924	130617	ENSG00000158552	8.57	8.89	No
GSHG0016449	TTC7A	up	1.25	0.0172	chr2(+):47143296-47301281	UCSC	tetratricopeptide repeat domain 7A	TTC7 // KIAA1140	AK056464	57217	ENSG00000068724	7.94	8.26	No
GSHG0014546	HNRNPM	up	1.24	0.00958	chr19(+):8509651-8553998	UCSC	heterogeneous nuclear ribonucleoprotein M	HNRPM // NAGR1 // CEAR // HNRNPM4 // HNRPM4 // HTGR1	AF061832	4670	ENSG00000099783	9.14	9.45	No
GSHG0001662	CCNL2	up	1.24	0.0467	chr1(-):1319930-1334716	UCSC	cyclin L2	CCNM // ania-6b // HLA-ISO // PCEE // SB138	AY037150	81669	ENSG00000221978	8.25	8.56	No
GSHG0001622	OR2L3	up	1.24	0.0111	chr1(+):248223964-248224975	UCSC	olfactory receptor, family 2, subfamily L, member 3	---	BC137040	391192	ENSG00000198128	6.04	6.35	Yes
GSHG0033010	---	up	1.24	0.0496	chrY(+):27768291-27771049	UCSC	---	---	AF000981	---	---	5.59	5.9	No
GSHG0032232	ARMCX2	up	1.24	0.0201	chrX(-):100910272-100914835	UCSC	armadillo repeat containing, X-linked 2	ALEX2 // KIAA0512	BX648494	9823	ENSG00000184867	6.82	7.13	No
GSHG0032156	SNX12	up	1.24	0.0015	chrX(-):70207156-70288246	UCSC	sorting nexin 12	---	BC020559	29934	ENSG00000147164	7.7	8.01	No
GSHG0031283	SNHG7	up	1.24	0.00822	chr9(-):139615818-139622636	UCSC	small nucleolar RNA host gene 7 (non-protein coding)	MGC16037 // NCRNA00061	AK054908	84973	ENSG00000233016	8.8	9.11	Yes
GSHG0030542	CEL	up	1.24	0.00668	chr9(+):135937368-135947248	UCSC	carboxyl ester lipase (bile salt-stimulated lipase)	BSSL // MODY8	X54457	1056	ENSG00000170835	7.05	7.36	Yes
GSHG0003426	EIF4EBP2	up	1.24	0.016	chr10(+):72163901-72183669	UCSC	eukaryotic translation initiation factor 4E binding protein 2	---	BC050633	1979	ENSG00000148730	11.79	12.1	Yes
GSHG0027965	BRAT1	up	1.24	0.0161	chr7(-):2577487-2595328	UCSC	BRCA1-associated ATM activator 1	BAAT1 // C7orf27 // MGC22916	AK131083	221927	ENSG00000106009	7.84	8.15	Yes
GSHG0027557	ZNF498	up	1.24	0.0173	chr7(+):99214567-99336129	UCSC	zinc finger protein 498	ZSCAN25 // FLJ32468	BX640720	221785	ENSG00000197037	7.91	8.22	No
GSHG0025748	CUL9	up	1.24	0.0208	chr6(+):43149920-43192324	UCSC	cullin 9	H7AP1 // KIAA0708 // PARC	CR749511	23113	ENSG00000112659	7.71	8.02	No
GSHG0023724	SDHA	up	1.24	0.0436	chr5(+):218398-256794	UCSC	succinate dehydrogenase complex, subunit A, flavoprotein (Fp)	SDH2 // FP // SDHF	BC041016	6389	ENSG00000073578	8.9	9.21	No
GSHG0023081	TNIP2	up	1.24	0.0438	chr4(-):2743387-2758103	UCSC	TNFAIP3 interacting protein 2	ABIN-2 // FLIP1 // KLIP // MGC4289	AF372839	79155	ENSG00000168884	6.9	7.22	Yes
GSHG0022655	IL8	up	1.24	0.0434	chr4(+):74606275-74609431	UCSC	interleukin 8	3-10C // AMCF-I // b-ENAP // CXCL8 // GCP-1 // GCP1 // IL-8 // K60 // LECT // LUCT // LYNAP // MDNCF // MONAP // NAF // NAP-1 // NAP1 // SCYB8 // TSG-1	M17017	3576	ENSG00000169429	6.82	7.13	No
GSHG0021680	SCAP	up	1.24	0.0273	chr3(-):47455201-47517435	UCSC	SREBF chaperone	KIAA0199	D83782	22937	ENSG00000114650	8.45	8.77	No
GSHG0019111	---	up	1.24	0.0377	chr20(-):31136310-31172875	UCSC	---	---	BC065483	---	---	8.98	9.29	Yes
GSHG0018650	DEFB115	up	1.24	0.0132	chr20(+):29845467-29847435	UCSC	defensin, beta 115	DEFB-15	DQ012019	245929	ENSG00000215547	6.45	6.77	No
GSHG0017769	RETSAT	up	1.24	0.0384	chr2(-):85569214-85581655	UCSC	retinol saturase (all-trans-retinol 13,14-reductase)	FLJ20296	AK075261	54884	ENSG00000042445	7.22	7.52	No
GSHG0015333	AP3D1	up	1.23	0.00474	chr19(-):2100988-2151542	UCSC	adaptor-related protein complex 3, delta 1 subunit	ADTD	U91930	8943	ENSG00000065000	8.75	9.04	No
GSHG0015184	LAIR2	up	1.23	0.00736	chr19(+):55009099-55021895	UCSC	leukocyte-associated immunoglobulin-like receptor 2	CD306	DQ656002	3904	ENSG00000167618	9.25	9.55	Yes
GSHG0014615	JUNB	up	1.23	0.018	chr19(+):12902308-12904127	UCSC	jun B proto-oncogene	---	BC110372	3726	ENSG00000171223	7.69	7.99	Yes
GSHG0013881	---	up	1.23	0.0165	chr18(+):3594112-3598350	UCSC	---	---	AX747919	---	---	7.16	7.46	No
GSHG0013266	RAD51D // RFFL	up	1.23	0.0469	chr17(-):33336131-33448541	UCSC	RAD51 homolog D (S. cerevisiae) // ring finger and FYVE-like domain containing 1	RAD51L3 // fring // HsTRAD // R51H3 // rififylin // RNF189 // RNF34L // Trad	AK097811	117584 // 5892	ENSG00000092871 // ENSG00000185379	7.39	7.69	Yes
GSHG0001895	SLC9A1	up	1.23	0.0082	chr1(-):27425306-27481403	UCSC	solute carrier family 9 (sodium/hydrogen exchanger), member 1	APNH // NHE1	S68616	6548	ENSG00000090020	8.42	8.72	No
GSHG0001890	GPN2	up	1.23	0.00438	chr1(-):27202624-27216788	UCSC	GPN-loop GTPase 2	ATPBD1B // FLJ10349	AY358864	54707	ENSG00000142751	7.69	7.98	No
GSHG0011766	GDPD3	up	1.23	0.00796	chr16(-):30116132-30124878	UCSC	glycerophosphodiester phosphodiesterase domain containing 3	MGC4171	BC002714	79153	ENSG00000102886	7.79	8.09	No
GSHG0001675	---	up	1.23	0.0332	chr1(-):1730379-1733912	UCSC	---	---	AK123609	---	---	8.2	8.49	Yes
GSHG0010241	ATP10A	up	1.23	0.0471	chr15(-):25922420-26110319	UCSC	ATPase, class V, type 10A	ATP10C // ATPVA // ATPVC // KIAA0566	AB051358	57194	ENSG00000206190	7.76	8.06	Yes
GSHG0006212	---	up	1.23	0.0448	chr11(-):117066329-117072630	UCSC	---	---	AK026219	---	---	6.96	7.26	No
GSHG0033166	KLC2	up	1.23	0.0183	chr11(+):66025229-66035330	UCSC	kinesin light chain 2	FLJ12387	AK022907	64837	ENSG00000174996	8.04	8.34	No
GSHG0004980	SLC22A20	up	1.23	0.0499	chr11(+):65003884-65010228	UCSC	solute carrier family 22, member 20	FLJ16331 // Oat6	AK094565	440044	ENSG00000197847	8.93	9.23	Yes
GSHG0004971	ZFPL1	up	1.23	0.0037	chr11(+):64851707-64855871	UCSC	zinc finger protein-like 1	D11S750 // MCG4	AF030291	7542	ENSG00000162300	8.25	8.54	Yes
GSHG0000776	AMPD2	up	1.23	0.0404	chr1(+):110162126-110174756	UCSC	adenosine monophosphate deaminase 2	---	AK025706	271	ENSG00000116337	8.77	9.07	Yes
GSHG0032499	AMELY	up	1.23	0.0323	chrY(-):6733959-6742068	UCSC	amelogenin, Y-linked	AMGL	M86933	266	ENSG00000099721	7.54	7.84	No
GSHG0031193	CCBL1	up	1.23	0.0044	chr9(-):131595223-131644348	UCSC	cysteine conjugate-beta lyase, cytoplasmic	GTK // KATI	BC021262	883	ENSG00000171097	7.29	7.59	No
GSHG0031088	HDHD3	up	1.23	0.0191	chr9(-):116135698-116156659	UCSC	haloacid dehalogenase-like hydrolase domain containing 3	C9orf158 // MGC12904	AK097067	81932	ENSG00000119431	7.2	7.49	Yes
GSHG0032706	WASH7P	up	1.23	0.0112	chr9(-):14515-25014	UCSC	WAS protein family homolog 7 pseudogene	FAM39F	BC027921	653635	ENSG00000227232	9.82	10.12	No
GSHG0029942	PARP10	up	1.23	0.0333	chr8(-):145051321-145064138	UCSC	poly (ADP-ribose) polymerase family, member 10	FLJ14464	BC035485	84875	ENSG00000178685	7.82	8.11	No
GSHG0029331	MFSD3	up	1.23	0.0372	chr8(+):145734552-145736589	UCSC	major facilitator superfamily domain containing 3	---	BC011982	113655	ENSG00000167700	7.74	8.04	No
GSHG0029298	GSDMD	up	1.23	0.000742	chr8(+):144635557-144645232	UCSC	gasdermin D	GSDMDC1 // DF5L // FLJ12150	AK291817	79792	ENSG00000104518	7.69	7.98	No
GSHG0027590	SRRT	up	1.23	0.0433	chr7(+):100472701-100486285	UCSC	serrate RNA effector molecule homolog (Arabidopsis)	ARS2 // Asr2 // serrate	AK302820	51593	ENSG00000087087	9.17	9.46	Yes
GSHG0027032	RSPH3	up	1.23	0.0123	chr6(-):159397866-159421219	UCSC	radial spoke 3 homolog (Chlamydomonas)	RSHL2 // dJ111C20.1 // RSP3	AK057655	83861	ENSG00000130363	6.97	7.27	No
GSHG0025379	---	up	1.23	0.0456	chr6(+):3231637-3271069	UCSC	---	---	AK125314	---	---	7.78	8.08	No
GSHG0025105	SLC23A1	up	1.23	0.0344	chr5(-):138702887-138719004	UCSC	solute carrier family 23 (nucleobase transporters), member 1	SLC23A2 // SVCT1 // YSPL3	BC019225	9963	ENSG00000170482	8.02	8.32	No
GSHG0024503	---	up	1.23	0.0445	chr5(+):175970632-175973613	UCSC	---	---	AK128446	---	---	7.16	7.47	No
GSHG0020402	---	up	1.23	0.0136	chr22(-):39532704-39537189	UCSC	---	---	AK124238	---	---	6.1	6.41	No
GSHG0020119	TBC1D22A	up	1.23	0.0434	chr22(+):47158527-47569735	UCSC	TBC1 domain family, member 22A	C22orf4	AK055591	25771	ENSG00000054611	7.99	8.29	No
GSHG0019848	CRKL	up	1.23	0.00524	chr22(+):21271697-21308037	UCSC	v-crk sarcoma virus CT10 oncogene homolog (avian)-like	---	BC026248	1399	ENSG00000099942	10.68	10.98	No
GSHG0018170	ATP5G3	up	1.23	0.012	chr2(-):176042795-176049335	UCSC	ATP synthase, H+ transporting, mitochondrial Fo complex, subunit C3 (subunit 9)	---	AK125917	518	ENSG00000154518	10	10.3	No
GSHG0016328	CAD	up	1.23	0.0117	chr2(+):27440258-27466653	UCSC	carbamoyl-phosphate synthetase 2, aspartate transcarbamylase, and dihydroorotase	---	BC065510	790	ENSG00000084774	8.02	8.32	No
GSHG0002113	LRP8	up	1.22	0.00172	chr1(-):53711217-53793726	UCSC	low density lipoprotein receptor-related protein 8, apolipoprotein e receptor	APOER2	D50678	7804	ENSG00000157193	9.44	9.72	No
GSHG0013587	TRIM25	up	1.22	0.0448	chr17(-):54968029-54991393	UCSC	tripartite motif containing 25	ZNF147 // EFP // RNF147	AB208994	7706	ENSG00000121060	8.95	9.24	No
GSHG0012436	TBC1D3 // TBC1D3F // TBC1D3G // TBC1D3H	up	1.22	0.0151	chr17(+):36284002-36294915	UCSC	TBC1 domain family, member 3 // TBC1 domain family, member 3F // TBC1 domain family, member 3G // TBC1 domain family, member 3H	DKFZp434P2235 // PRC17 // TBC1D3A	BC078140	654341 // 729873 // 729877 // 84218	ENSG00000161583 // ENSG00000185128 // ENSG00000197681 // ENSG00000242384	8.17	8.46	Yes
GSHG0013081	PIK3R5	up	1.22	0.0259	chr17(-):8608266-8869029	UCSC	phosphoinositide-3-kinase, regulatory subunit 5	p101 // P101-PI3K	AK129627	23533	ENSG00000141506	8.94	9.22	Yes
GSHG0012188	KCTD11	up	1.22	0.00688	chr17(+):7255481-7258260	UCSC	potassium channel tetramerisation domain containing 11	C17orf36 // KCASH1 // REN	AY646650	147040	ENSG00000213859	6.54	6.83	No
GSHG0001830	ECE1	up	1.22	0.0236	chr1(-):21545099-21671906	UCSC	endothelin converting enzyme 1	ECE	X98272	1889	ENSG00000117298	8.14	8.43	No
GSHG0010861	E4F1	up	1.22	0.00666	chr16(+):2273580-2285742	UCSC	E4F transcription factor 1	E4F	BC080524	1877	ENSG00000167967	8.03	8.31	No
GSHG0010634	ADAMTS7	up	1.22	0.0152	chr15(-):79051546-79120230	UCSC	ADAM metallopeptidase with thrombospondin type 1 motif, 7	ADAM-TS7 // DKFZp434H204	AK299844	11173	ENSG00000136378	7.62	7.91	No
GSHG0001023	HCN3	up	1.22	0.0161	chr1(+):155247245-155259638	UCSC	hyperpolarization activated cyclic nucleotide-gated potassium channel 3	KIAA1535	AK055840	57657	ENSG00000143630	7.21	7.49	No
GSHG0000819	MOV10	up	1.22	0.00884	chr1(+):113217043-113243357	UCSC	Mov10, Moloney leukemia virus 10, homolog (mouse)	fSAP113 // gb110 // MGC2948	AL833353	4343	ENSG00000155363	8.54	8.82	No
GSHG0030272	FAM120A	up	1.22	0.0174	chr9(+):96213978-96328389	UCSC	family with sequence similarity 120A	C9orf10 // DNAPTP1 // KIAA0183	BC075701	23196	ENSG00000048828	9.78	10.06	No
GSHG0029940	PLEC	up	1.22	0.0409	chr8(-):144989321-145050908	UCSC	plectin	EBS1 // PLEC1 // PCN // PLTN	U53204	5339	ENSG00000178209	7.92	8.21	No
GSHG0027249	PLEKHA8	up	1.22	0.0211	chr7(+):30068028-30170096	UCSC	pleckstrin homology domain containing, family A (phosphoinositide binding specific) member 8	FAPP2 // MGC3358	AK023180	84725	ENSG00000106086	7.15	7.43	No
GSHG0027153	ZDHHC4	up	1.22	0.000118	chr7(+):6617065-6628980	UCSC	zinc finger, DHHC-type containing 4	FLJ10479 // ZNF374	AK223532	55146	ENSG00000136247	8.84	9.13	Yes
GSHG0023754	PAPD7	up	1.22	0.0441	chr5(+):6714726-6757158	UCSC	PAP associated domain containing 7	POLS // LAK-1 // POLK // TRF4 // TRF4-1	AF089896	11044	ENSG00000112941	9	9.29	No
GSHG0023046	ATP5I	up	1.22	0.0498	chr4(-):666226-668099	UCSC	ATP synthase, H+ transporting, mitochondrial Fo complex, subunit E	---	D50371	521	ENSG00000169020	8.15	8.44	No
GSHG0022395	IDUA	up	1.22	0.0229	chr4(+):980785-998293	UCSC	iduronidase, alpha-L-	MPS1	M74715	3425	ENSG00000127415	8.52	8.81	Yes
GSHG0021699	SLC26A6	up	1.22	0.0112	chr3(-):48663158-48672926	UCSC	solute carrier family 26, member 6	DKFZp586E1422	AK056237	65010	ENSG00000225697	7.67	7.95	No
GSHG0020489	CERK	up	1.22	0.0188	chr22(-):47080308-47134165	UCSC	ceramide kinase	dA59H18.2 // dA59H18.3 // DKFZp434E0211 // FLJ21430 // FLJ23239 // hCERK // KIAA1646 // LK4	AB079066	64781	ENSG00000100422	8.81	9.09	No
GSHG0020444	RRP7B	up	1.22	0.000945	chr22(-):42951229-42984651	UCSC	ribosomal RNA processing 7 homolog B (S. cerevisiae)	dJ222E13.2	AK074492	91695	ENSG00000182841	8.52	8.81	Yes
GSHG0002103	CC2D1B	up	1.21	0.0323	chr1(-):52816267-52831841	UCSC	coiled-coil and C2 domain containing 1B	KIAA1836	AK130874	200014	ENSG00000154222	8.16	8.43	No
GSHG0013194	USP22	up	1.21	0.0256	chr17(-):20902910-20947073	UCSC	ubiquitin specific peptidase 22	USP3L // KIAA1063	AB028986	23326	ENSG00000124422	9.51	9.78	No
GSHG0012965	PRPF8	up	1.21	0.0212	chr17(-):1553924-1588141	UCSC	PRP8 pre-mRNA processing factor 8 homolog (S. cerevisiae)	RP13 // Prp8 // PRPC8	BC064370	10594	ENSG00000174231	10.14	10.41	No
GSHG0012887	RPTOR	up	1.21	0.0142	chr17(+):78518619-78940171	UCSC	regulatory associated protein of MTOR, complex 1	KIAA1303 // KOG1 // Mip1 // raptor	AY090663	57521	ENSG00000141564	8.33	8.6	No
GSHG0011078	ATP2A1	up	1.21	0.0202	chr16(+):28889809-28915830	UCSC	ATPase, Ca++ transporting, cardiac muscle, fast twitch 1	ATP2A // SERCA1	BX537784	487	ENSG00000196296	6.9	7.18	No
GSHG0001690	PANK4	up	1.21	0.0159	chr1(-):2439975-2458067	UCSC	pantothenate kinase 4	FLJ10782	AK001644	55229	ENSG00000157881	7.84	8.11	No
GSHG0010207	---	up	1.21	0.0371	chr15(+):101171533-101173061	UCSC	---	---	AK000966	---	---	6.38	6.66	No
GSHG0010123	---	up	1.21	0.0426	chr15(+):89110825-89111873	UCSC	---	---	AK129489	---	---	7.37	7.64	No
GSHG0006456	PHC1	up	1.21	0.0261	chr12(+):9067149-9094058	UCSC	polyhomeotic homolog 1 (Drosophila)	EDR1 // HPH1 // RAE28	BC073964	1911	ENSG00000111752	9.18	9.45	No
GSHG0031972	---	up	1.21	0.0394	chrX(-):11679220-11681048	UCSC	---	---	AK027253	---	---	7.39	7.66	No
GSHG0031556	---	up	1.21	0.0162	chrX(+):53123368-53172635	UCSC	---	---	EF565109	---	---	7.63	7.9	No
GSHG0030108	TMEM8B	up	1.21	0.0186	chr9(+):35814447-35854843	UCSC	transmembrane protein 8B	C9orf127 // NAG-5 // NGX6	AK074844	51754	ENSG00000137103	7.42	7.7	Yes
GSHG0026457	CCHCR1	up	1.21	0.00514	chr6(-):31110217-31125972	UCSC	coiled-coil alpha-helical rod protein 1	C6orf18 // HCR	AK000204	54535	ENSG00000204536	7.4	7.68	Yes
GSHG0025511	BTN2A1	up	1.21	0.0384	chr6(+):26458178-26476849	UCSC	butyrophilin, subfamily 2, member A1	BT2.1 // BTF1	AB209777	11120	ENSG00000112763	7.71	7.98	Yes
GSHG0022058	---	up	1.21	0.0116	chr3(-):129823524-129826996	UCSC	---	---	AK125025	---	---	7.15	7.42	No
GSHG0021148	---	up	1.21	0.0376	chr3(+):129612714-129627754	UCSC	---	---	AK127796	---	---	6.85	7.12	Yes
GSHG0019229	SLC35C2	up	1.21	0.0438	chr20(-):44978368-44993064	UCSC	solute carrier family 35, member C2	C20orf5 // OVCOV1 // bA394O2.1 // CGI-15	AF455052	51006	ENSG00000080189	8.2	8.48	No
GSHG0018012	---	up	1.21	0.0494	chr2(-):132722304-132737447	UCSC	---	---	AK123815	---	---	6.8	7.07	No
GSHG0017995	POTEF	up	1.21	0.0461	chr2(-):130831603-130886796	UCSC	POTE ankyrin domain family, member F	A26C1B // POTE2alpha // POTEACTIN	EF523384	728378	ENSG00000196604	7.45	7.73	Yes
GSHG0017738	DCTN1 // SLC4A5	up	1.21	0.0426	chr2(-):74438733-74618994	UCSC	dynactin 1 // solute carrier family 4, sodium bicarbonate cotransporter, member 5	NBC4	AF207661	1639 // 57835	ENSG00000188687 // ENSG00000204843	8.41	8.68	No
GSHG0015843	B9D2	up	1.21	0.0315	chr19(-):41860327-41870037	UCSC	B9 protein domain 2	MGC4093	BC004444	80776	ENSG00000123810	7.53	7.81	No
GSHG0009954	---	up	1.2	0.0305	chr15(+):67178484-67183189	UCSC	---	---	BX648316	---	---	6.62	6.89	Yes
GSHG0004955	GPR137	up	1.2	0.0321	chr11(+):64037534-64056965	UCSC	G protein-coupled receptor 137	C11orf4 // GPR137A // TM7SF1L1	BC029297	56834	ENSG00000173264	7.6	7.87	Yes
GSHG0024603	---	up	1.2	0.0362	chr5(-):8080299-8080874	UCSC	---	---	AF056453	---	---	7.66	7.93	No
GSHG0024238	TCF7	up	1.2	0.0266	chr5(+):133450402-133483927	UCSC	transcription factor 7 (T-cell specific, HMG-box)	TCF-1	BC048769	6932	ENSG00000081059	10.87	11.14	No
GSHG0021776	TKT	up	1.2	0.0213	chr3(-):53258730-53290047	UCSC	transketolase	---	BX647248	7086	ENSG00000163931	9.28	9.54	No
GSHG0020568	ARPC4 // TTLL3	up	1.2	0.0233	chr3(+):9834242-9896822	UCSC	actin related protein 2/3 complex, subunit 4, 20kDa // tubulin tyrosine ligase-like family, member 3	ARC20 // DKFZP434B103 // HOTTL // p20-Arc	AK024110	10093 // 26140	ENSG00000214021 // ENSG00000241553	8.53	8.8	No
GSHG0019509	UBASH3A	up	1.2	0.0366	chr21(+):43823990-43867774	UCSC	ubiquitin associated and SH3 domain containing A	CLIP4 // STS-2 // TULA	AJ277750	53347	ENSG00000160185	9.16	9.43	No

## Sheet: PATHWAY ANALYSIS (KEGG)
Human T-ALL from xenograft, ShRNA SNCRIP-SNHG5 (n=4) versus ShRNA LUC (Ctrl, n=4)
2. KEGG Pathway Analysis on Regulated Genes
Regulated Genes in Pathways (green, down-regulated; pink, up-regulated)
Link to KEGG Pathway	Pathway Description (KEGG)	FAST DB STABLE ID	Gene Symbol	Gene Name	Link to KEGG Gene	Regulation	Fold-Change	P-Value
hsa03010	Ribosome	GSHG0004510	RPLP2	ribosomal protein, large, P2	6181	down	1.24	0.00904
hsa03010	Ribosome	GSHG0012454	RPL19	ribosomal protein L19	6143	down	1.21	0.019
hsa03010	Ribosome	GSHG0008007	RPL21	ribosomal protein L21	6144	down	1.52	0.0294
hsa03010	Ribosome	GSHG0022779	RPL34	ribosomal protein L34	6164	down	1.34	0.00126
hsa03010	Ribosome	GSHG0026539	RPS10	ribosomal protein S10	6204	down	1.26	0.0243
hsa03010	Ribosome	GSHG0021470	RPL35A	ribosomal protein L35a	6165	down	1.35	0.0207
hsa03010	Ribosome	GSHG0010494	RPS27L	ribosomal protein S27-like	51065	down	2.08	0.0136
hsa03010	Ribosome	GSHG0012790	RPL38	ribosomal protein L38	6169	down	1.85	0.0213
hsa03010	Ribosome	GSHG0033284	RPL17	ribosomal protein L17	6139	down	1.35	0.00518
hsa03010	Ribosome	GSHG0031167	RPL12	ribosomal protein L12	6136	down	1.22	0.0128
hsa03010	Ribosome	GSHG0031920	RPL10	ribosomal protein L10	6134	down	1.29	0.0308
hsa03010	Ribosome	GSHG0029968	RPL8	ribosomal protein L8	6132	down	1.23	0.0283
hsa03010	Ribosome	GSHG0033322	RPL13A	ribosomal protein L13a	23521	down	1.3	0.00048
hsa03010	Ribosome	GSHG0030544	RPL7A	ribosomal protein L7a	6130	down	1.29	0.00564
hsa03010	Ribosome	GSHG0033247	RPS17	ribosomal protein S17	6218	down	1.33	2.02e-05
hsa03010	Ribosome	GSHG0001001	RPS27	ribosomal protein S27	6232	down	1.42	0.0179
hsa03010	Ribosome	GSHG0009970	RPLP1	ribosomal protein, large, P1	6176	down	1.44	0.00306
hsa03010	Ribosome	GSHG0029736	RPL30	ribosomal protein L30	6156	down	1.38	0.0094
hsa03010	Ribosome	GSHG0010437	RSL24D1	ribosomal L24 domain containing 1	51187	down	1.54	0.0281
hsa03010	Ribosome	GSHG0009333	RPL10L	ribosomal protein L10-like	140801	down	1.43	0.0121
hsa03010	Ribosome	GSHG0033410	RPL32P3 // SNORA7B	ribosomal protein L32 pseudogene 3 // small nucleolar RNA, H/ACA box 7B	677797	up	1.48	0.0438
hsa03010	Ribosome	GSHG0025647	RPS18	ribosomal protein S18	6222	down	1.22	0.0163
hsa03010	Ribosome	GSHG0032164	RPS4X	ribosomal protein S4, X-linked	6191	down	1.34	0.00324
hsa03010	Ribosome	GSHG0032455	RPS4Y1	ribosomal protein S4, Y-linked 1	6192	down	1.3	0.0468
hsa03010	Ribosome	GSHG0024473	RPL26L1	ribosomal protein L26-like 1	51121	down	1.25	0.00268
hsa03010	Ribosome	GSHG0007794	RPL6	ribosomal protein L6	6128	down	1.28	0.00998
hsa00190	Oxidative phosphorylation	GSHG0012241	COX10	COX10 homolog, cytochrome c oxidase assembly protein, heme A: farnesyltransferase (yeast)	1352	down	1.25	0.0398
hsa00190	Oxidative phosphorylation	GSHG0030393	ATP6V1G1	ATPase, H+ transporting, lysosomal 13kDa, V1 subunit G1	9550	down	1.27	0.0247
hsa00190	Oxidative phosphorylation	GSHG0019939	UQCR10	ubiquinol-cytochrome c reductase, complex III subunit X	29796	down	1.58	0.0109
hsa00190	Oxidative phosphorylation	GSHG0028007	NDUFA4	NADH dehydrogenase (ubiquinone) 1 alpha subcomplex, 4, 9kDa	4697	down	1.39	0.0101
hsa00190	Oxidative phosphorylation	GSHG0011713	NDUFAB1	NADH dehydrogenase (ubiquinone) 1, alpha/beta subcomplex, 1, 8kDa	4706	down	1.32	0.0287
hsa00190	Oxidative phosphorylation	GSHG0015458	NDUFA7	NADH dehydrogenase (ubiquinone) 1 alpha subcomplex, 7, 14.5kDa	4701	down	1.25	0.041
hsa00190	Oxidative phosphorylation	GSHG0020439	NDUFA6	NADH dehydrogenase (ubiquinone) 1 alpha subcomplex, 6, 14kDa	4700	down	1.87	0.0139
hsa00190	Oxidative phosphorylation	GSHG0031636	COX7B	cytochrome c oxidase subunit VIIb	1349	down	1.54	0.0383
hsa00190	Oxidative phosphorylation	GSHG0018170	ATP5G3	ATP synthase, H+ transporting, mitochondrial Fo complex, subunit C3 (subunit 9)	518	up	1.23	0.012
hsa00190	Oxidative phosphorylation	GSHG0015404	FUT5 // NDUFA11	fucosyltransferase 5 (alpha (1,3) fucosyltransferase) // NADH dehydrogenase (ubiquinone) 1 alpha subcomplex, 11, 14.7kDa	126328	down	1.32	0.0333
hsa00190	Oxidative phosphorylation	GSHG0012606	ATP5G1	ATP synthase, H+ transporting, mitochondrial Fo complex, subunit C1 (subunit 9)	516	down	1.38	0.0369
hsa00190	Oxidative phosphorylation	GSHG0007556	ATP5B	ATP synthase, H+ transporting, mitochondrial F1 complex, beta polypeptide	506	down	1.42	0.0258
hsa00190	Oxidative phosphorylation	GSHG0010593	COX5A	cytochrome c oxidase subunit Va	9377	down	1.26	0.0424
hsa00190	Oxidative phosphorylation	GSHG0003178	ATP5C1	ATP synthase, H+ transporting, mitochondrial F1 complex, gamma polypeptide 1	509	down	1.59	0.0271
hsa00190	Oxidative phosphorylation	GSHG0006045	NDUFC2	NADH dehydrogenase (ubiquinone) 1, subcomplex unknown, 2, 14.5kDa	4718	down	1.28	0.0268
hsa00190	Oxidative phosphorylation	GSHG0013906	NDUFV2	NADH dehydrogenase (ubiquinone) flavoprotein 2, 24kDa	4729	down	1.41	0.0103
hsa00190	Oxidative phosphorylation	GSHG0011422	COX4I1	cytochrome c oxidase subunit IV isoform 1	1327	down	1.36	0.00894
hsa00190	Oxidative phosphorylation	GSHG0009432	ATP6V1D	ATPase, H+ transporting, lysosomal 34kDa, V1 subunit D	51382	down	1.63	0.0152
hsa00190	Oxidative phosphorylation	GSHG0027707	ATP6V1F	ATPase, H+ transporting, lysosomal 14kDa, V1 subunit F	9296	down	1.49	0.0365
hsa00190	Oxidative phosphorylation	GSHG0007102	ATP6V0A2	ATPase, H+ transporting, lysosomal V0 subunit a2	23545	down	1.24	0.0164
hsa00190	Oxidative phosphorylation	GSHG0019602	ATP5J	ATP synthase, H+ transporting, mitochondrial Fo complex, subunit F6	522	down	2.33	0.0136
hsa00190	Oxidative phosphorylation	GSHG0023046	ATP5I	ATP synthase, H+ transporting, mitochondrial Fo complex, subunit E	521	up	1.22	0.0498
hsa00190	Oxidative phosphorylation	GSHG0023724	SDHA	succinate dehydrogenase complex, subunit A, flavoprotein (Fp)	6389	up	1.24	0.0436
hsa00190	Oxidative phosphorylation	GSHG0013720	ATP5H	ATP synthase, H+ transporting, mitochondrial Fo complex, subunit d	10476	down	1.23	0.0339
hsa00190	Oxidative phosphorylation	GSHG0013580	COX11	COX11 cytochrome c oxidase assembly homolog (yeast)	1353	down	1.39	0.0257
hsa00190	Oxidative phosphorylation	GSHG0020166	ATP6V1E1	ATPase, H+ transporting, lysosomal 31kDa, V1 subunit E1	529	down	1.31	0.0456
hsa00190	Oxidative phosphorylation	GSHG0015701	UQCRFS1	ubiquinol-cytochrome c reductase, Rieske iron-sulfur polypeptide 1	7386	down	1.31	0.02
hsa00190	Oxidative phosphorylation	GSHG0011019	UQCRC2	ubiquinol-cytochrome c reductase core protein II	7385	down	1.5	0.00394
hsa03018	RNA degradation	GSHG0008052	EXOSC8	exosome component 8	11340	down	1.64	0.0331
hsa03018	RNA degradation	GSHG0028103	LSM5	LSM5 homolog, U6 small nuclear RNA associated (S. cerevisiae)	23658	down	1.4	0.05
hsa03018	RNA degradation	GSHG0004286	EXOSC1	exosome component 1	51013	down	1.41	0.0121
hsa03018	RNA degradation	GSHG0011949	EXOSC6	exosome component 6	118460	down	1.58	0.0454
hsa03018	RNA degradation	GSHG0005805	PATL1	protein associated with topoisomerase II homolog 1 (yeast)	219988	down	1.27	0.0182
hsa03018	RNA degradation	GSHG0006838	CNOT2	CCR4-NOT transcription complex, subunit 2	4848	down	1.63	0.00788
hsa03018	RNA degradation	GSHG0029314	EXOSC4	exosome component 4	54512	down	1.42	0.0267
hsa03018	RNA degradation	GSHG0009097	PAPOLA	poly(A) polymerase alpha	10914	down	1.3	0.0191
hsa03018	RNA degradation	GSHG0011880	CNOT1	CCR4-NOT transcription complex, subunit 1	23019	down	1.26	0.0434
hsa03018	RNA degradation	GSHG0020607	LSM3	LSM3 homolog, U6 small nuclear RNA associated (S. cerevisiae)	27258	down	1.68	0.00458
hsa03018	RNA degradation	GSHG0015844	EXOSC5	exosome component 5	56915	down	1.42	0.0261
hsa03018	RNA degradation	GSHG0007175	DCP1B	DCP1 decapping enzyme homolog B (S. cerevisiae)	196513	down	1.56	0.0196
hsa03018	RNA degradation	GSHG0029427	CNOT7	CCR4-NOT transcription complex, subunit 7	29883	down	1.66	0.0054
hsa03018	RNA degradation	GSHG0023754	PAPD7	PAP associated domain containing 7	11044	up	1.22	0.0441
hsa03050	Proteasome	GSHG0013677	PSMD12	proteasome (prosome, macropain) 26S subunit, non-ATPase, 12	5718	down	1.66	0.0159
hsa03050	Proteasome	GSHG0012521	PSME3	proteasome (prosome, macropain) activator subunit 3 (PA28 gamma; Ki)	10197	down	1.63	0.0342
hsa03050	Proteasome	GSHG0012446	PSMB3	proteasome (prosome, macropain) subunit, beta type, 3	5691	down	1.4	0.016
hsa03050	Proteasome	GSHG0005610	COPB1 // PSMA1	coatomer protein complex, subunit beta 1 // proteasome (prosome, macropain) subunit, alpha type, 1	5682	down	1.49	0.0075
hsa03050	Proteasome	GSHG0008018	POMP	proteasome maturation protein	51371	down	2.05	0.011
hsa03050	Proteasome	GSHG0031146	PSMB7	proteasome (prosome, macropain) subunit, beta type, 7	5695	down	1.37	0.0322
hsa03050	Proteasome	GSHG0009050	PSMC1	proteasome (prosome, macropain) 26S subunit, ATPase, 1	5700	down	1.25	0.031
hsa03050	Proteasome	GSHG0011351	PSMD7	proteasome (prosome, macropain) 26S subunit, non-ATPase, 7	5713	down	1.42	0.0123
hsa03050	Proteasome	GSHG0027624	PSMC2	proteasome (prosome, macropain) 26S subunit, ATPase, 2	5701	down	1.39	0.0496
hsa03050	Proteasome	GSHG0010055	PSMA4	proteasome (prosome, macropain) subunit, alpha type, 4	5685	down	1.94	0.00482
hsa03050	Proteasome	GSHG0008867	PSMA3	proteasome (prosome, macropain) subunit, alpha type, 3	5684	down	1.53	0.00446
hsa03050	Proteasome	GSHG0011925	PSMB10	proteasome (prosome, macropain) subunit, beta type, 10	5699	up	1.28	0.00778
hsa04115	p53 signaling pathway	GSHG0012705	PPM1D	protein phosphatase, Mg2+/Mn2+ dependent, 1D	8493	down	1.31	0.0419
hsa04115	p53 signaling pathway	GSHG0020167	BID	BH3 interacting domain death agonist	637	down	1.51	0.0288
hsa04115	p53 signaling pathway	GSHG0030758	PTENP1	phosphatase and tensin homolog pseudogene 1	11191	down	1.51	0.0305
hsa04115	p53 signaling pathway	GSHG0006826	MDM2	Mdm2 p53 binding protein homolog (mouse)	4193	down	1.41	0.0336
hsa04115	p53 signaling pathway	GSHG0003392	CDK1	cyclin-dependent kinase 1	983	down	2.11	0.0112
hsa04115	p53 signaling pathway	GSHG0014085	PMAIP1	phorbol-12-myristate-13-acetate-induced protein 1	5366	down	1.83	0.000784
hsa04115	p53 signaling pathway	GSHG0014450	GADD45B	growth arrest and DNA-damage-inducible, beta	4616	down	1.34	0.00812
hsa04115	p53 signaling pathway	GSHG0029725	CCNE2	cyclin E2	9134	down	1.71	0.0295
hsa04115	p53 signaling pathway	GSHG0009902	CCNB2	cyclin B2	9133	down	1.76	0.00476
hsa04115	p53 signaling pathway	GSHG0029464	TNFRSF10B	tumor necrosis factor receptor superfamily, member 10b	8795	down	1.55	0.0358
hsa04115	p53 signaling pathway	GSHG0005373	EI24	etoposide induced 2.4 mRNA	9538	down	1.34	0.0272
hsa04115	p53 signaling pathway	GSHG0029761	RRM2B	ribonucleotide reductase M2 B (TP53 inducible)	50484	down	1.43	0.0233
hsa04115	p53 signaling pathway	GSHG0024431	CCNG1	cyclin G1	900	down	1.42	0.0168
hsa04110	Cell cycle	GSHG0018774	YWHAB	tyrosine 3-monooxygenase/tryptophan 5-monooxygenase activation protein, beta polypeptide	7529	down	1.84	0.00838
hsa04110	Cell cycle	GSHG0023506	CCNA2	cyclin A2	890	down	1.37	0.0393
hsa04110	Cell cycle	GSHG0004629	WEE1	WEE1 homolog (S. pombe)	7465	down	1.45	0.0233
hsa04110	Cell cycle	GSHG0006826	MDM2	Mdm2 p53 binding protein homolog (mouse)	4193	down	1.41	0.0336
hsa04110	Cell cycle	GSHG0008105	RB1	retinoblastoma 1	5925	down	1.45	0.0469
hsa04110	Cell cycle	GSHG0025066	SKP1	S-phase kinase-associated protein 1	6500	down	1.33	0.0143
hsa04110	Cell cycle	GSHG0003392	CDK1	cyclin-dependent kinase 1	983	down	2.11	0.0112
hsa04110	Cell cycle	GSHG0014450	GADD45B	growth arrest and DNA-damage-inducible, beta	4616	down	1.34	0.00812
hsa04110	Cell cycle	GSHG0029725	CCNE2	cyclin E2	9134	down	1.71	0.0295
hsa04110	Cell cycle	GSHG0009902	CCNB2	cyclin B2	9133	down	1.76	0.00476
hsa04110	Cell cycle	GSHG0012477	CDC6	cell division cycle 6 homolog (S. cerevisiae)	990	down	1.35	0.0219
hsa04110	Cell cycle	GSHG0003752	BUB3	budding uninhibited by benzimidazoles 3 homolog (yeast)	9184	down	1.35	0.0261
hsa04110	Cell cycle	GSHG0029753	YWHAZ	tyrosine 3-monooxygenase/tryptophan 5-monooxygenase activation protein, zeta polypeptide	7534	down	1.59	0.0233
hsa04110	Cell cycle	GSHG0019965	YWHAH	tyrosine 3-monooxygenase/tryptophan 5-monooxygenase activation protein, eta polypeptide	7533	down	1.6	0.0373
hsa04110	Cell cycle	GSHG0029795	RAD21	RAD21 homolog (S. pombe)	5885	down	1.63	0.0104
hsa04110	Cell cycle	GSHG0018989	PCNA	proliferating cell nuclear antigen	5111	down	1.44	0.0386
hsa04110	Cell cycle	GSHG0023497	MAD2L1	MAD2 mitotic arrest deficient-like 1 (yeast)	4085	down	1.83	0.0439
hsa04110	Cell cycle	GSHG0012908	ANAPC11	anaphase promoting complex subunit 11	51529	down	1.24	0.0373
hsa04110	Cell cycle	GSHG0031799	STAG2	stromal antigen 2	10735	down	1.61	0.0174
hsa04120	Ubiquitin mediated proteolysis	GSHG0009960	PIAS1	protein inhibitor of activated STAT, 1	8554	down	1.59	0.00588
hsa04120	Ubiquitin mediated proteolysis	GSHG0010031	UBE2Q2	ubiquitin-conjugating enzyme E2Q family member 2	92912	down	1.52	0.0432
hsa04120	Ubiquitin mediated proteolysis	GSHG0005295	UBE4A	ubiquitination factor E4A	9354	down	1.3	0.0271
hsa04120	Ubiquitin mediated proteolysis	GSHG0013004	UBE2G1	ubiquitin-conjugating enzyme E2G 1	7326	down	1.49	0.0346
hsa04120	Ubiquitin mediated proteolysis	GSHG0033096	UBE2NL	ubiquitin-conjugating enzyme E2N-like	389898	down	1.34	0.0318
hsa04120	Ubiquitin mediated proteolysis	GSHG0006826	MDM2	Mdm2 p53 binding protein homolog (mouse)	4193	down	1.41	0.0336
hsa04120	Ubiquitin mediated proteolysis	GSHG0010445	NEDD4	neural precursor cell expressed, developmentally down-regulated 4	4734	down	1.42	0.0479
hsa04120	Ubiquitin mediated proteolysis	GSHG0023898	FBXO4	F-box protein 4	26272	down	1.54	0.0103
hsa04120	Ubiquitin mediated proteolysis	GSHG0010237	UBE3A	ubiquitin protein ligase E3A	7337	down	1.63	0.0412
hsa04120	Ubiquitin mediated proteolysis	GSHG0025066	SKP1	S-phase kinase-associated protein 1	6500	down	1.33	0.0143
hsa04120	Ubiquitin mediated proteolysis	GSHG0014285	PIAS2	protein inhibitor of activated STAT, 2	9063	down	1.26	0.0415
hsa04120	Ubiquitin mediated proteolysis	GSHG0031781	UBE2A	ubiquitin-conjugating enzyme E2A	7319	down	1.4	0.0268
hsa04120	Ubiquitin mediated proteolysis	GSHG0003380	UBE2D1	ubiquitin-conjugating enzyme E2D 1	7321	down	1.4	0.027
hsa04120	Ubiquitin mediated proteolysis	GSHG0029655	UBE2W	ubiquitin-conjugating enzyme E2W (putative)	55284	down	1.65	0.0154
hsa04120	Ubiquitin mediated proteolysis	GSHG0007683	UBE2N	ubiquitin-conjugating enzyme E2N	7334	down	1.71	0.00138
hsa04120	Ubiquitin mediated proteolysis	GSHG0003999	CUL2	cullin 2	8453	down	1.47	0.0496
hsa04120	Ubiquitin mediated proteolysis	GSHG0018382	CUL3	cullin 3	8452	down	1.28	0.0198
hsa04120	Ubiquitin mediated proteolysis	GSHG0024277	UBE2D2	ubiquitin-conjugating enzyme E2D 2	7322	down	1.26	0.0225
hsa04120	Ubiquitin mediated proteolysis	GSHG0029657	TCEB1	transcription elongation factor B (SIII), polypeptide 1 (15kDa, elongin C)	6921	down	1.36	0.0389
hsa04120	Ubiquitin mediated proteolysis	GSHG0012908	ANAPC11	anaphase promoting complex subunit 11	51529	down	1.24	0.0373
Significant Pathways (19)
Link to KEGG Pathway	Pathway Description (KEGG)	Nb Genes in Pathway	Nb Regulated Genes (Up / Down)	P-Value (All)	P-Value (Up)	P-Value (Down)	Min P-Value
hsa03010	Ribosome	87	26 (1/25)	2.84e-08	NA	1.73e-09	1.73e-09
hsa00190	Oxidative phosphorylation	130	28 (3/25)	9.29e-06	NA	5.87e-06	5.87e-06
hsa03018	RNA degradation	57	14 (1/13)	0.000795	NA	0.000381	0.000381
hsa03050	Proteasome	47	12 (1/11)	0.00159	NA	0.00107	0.00107
hsa04115	p53 signaling pathway	68	13 (0/13)	0.0114	NA	0.00198	0.00198
hsa04110	Cell cycle	125	19 (0/19)	0.0185	NA	0.00198	0.00198
hsa04120	Ubiquitin mediated proteolysis	137	20 (0/20)	0.0227	NA	0.00234	0.00234
